# Supplementary material
Source: PubMed Central journal article supplement (PMC9017059)
Supplement: mmc1.pdf [file mmc1.pdf]

# Correlates of COVID-19 Vaccination Intentions: Attitudes, Institutional Trust, Fear, Conspiracy Beliefs, and Vaccine Skepticism

Daniel Seddig, Dina Maskileyson, Eldad Davidov, Icek Ajzen, & Peter Schmidt

## Online Appendix

(Containing variable descriptions, R codes, and output)

| Content                                                                                                                                            | Page |
|----------------------------------------------------------------------------------------------------------------------------------------------------|------|
| <a href="#">A1. Variables and descriptive statistics.</a>                                                                                          | 1    |
| R code and output:                                                                                                                                 |      |
| <a href="#">A2. Exploratory factor analysis.</a>                                                                                                   | 4    |
| <a href="#">A3. Confirmatory factor analysis.</a>                                                                                                  | 7    |
| <a href="#">A4. SEM “Model 1”.</a>                                                                                                                 | 17   |
| <a href="#">A5. Robustness analysis “Model 1”, WLSMV estimator.</a>                                                                                | 19   |
| <a href="#">A6. Robustness analysis “Model 1”, omitting subjective norm.</a>                                                                       | 21   |
| <a href="#">A7. Robustness analysis “Model 1”, omitting perceived behavioral control.</a>                                                          | 23   |
| <a href="#">A8. SEM “Model 2” (latent interactions).</a>                                                                                           | 25   |
| <a href="#">A9. SEM “Model 3”.</a>                                                                                                                 | 29   |
| <a href="#">A10. Robustness analysis “Model 3”, WLSMV estimator.</a>                                                                               | 39   |
| <a href="#">A11. Power analysis “Model 3”.</a>                                                                                                     | 44   |
| <a href="#">A12. Additional models predicting COVID-19 conspiracy beliefs, skepticism toward vaccines, fear of COVID-19, and trust in science.</a> | 45   |

A1. Variables and descriptive statistics.

| Construct                          | Indicator | Wording                                                                                                                | Responses                                                                      | n    | Mean | Standard deviation | Skewness | Kurtosis |
|------------------------------------|-----------|------------------------------------------------------------------------------------------------------------------------|--------------------------------------------------------------------------------|------|------|--------------------|----------|----------|
| Intention (INT)                    | int1      | How likely are you to get vaccinated against the coronavirus?                                                          | 1 <i>very unlikely</i> to 7 <i>very likely</i>                                 | 3498 | 4.75 | 2.46               | -0.48    | -1.47    |
|                                    | int2      | I intend to get vaccinated against the coronavirus.                                                                    | 1 <i>not true at all</i> to 7 <i>completely true</i>                           | 3492 | 4.83 | 2.43               | -0.55    | -1.37    |
|                                    | int3*     | I will try to get a vaccination against the coronavirus.                                                               | 1 <i>definitely yes</i> to 7 <i>definitely not</i>                             | 3461 | 5.08 | 2.27               | -0.76    | -0.98    |
| Attitude (ATT)                     | att1*     | For me, vaccination against the coronavirus is ...                                                                     | 1 <i>good</i> to 7 <i>bad</i>                                                  | 3425 | 5.3  | 2.06               | -0.92    | -0.51    |
|                                    | att2*     | If I get vaccinated against the coronavirus, it will be ...                                                            | 1 <i>beneficial</i> to 7 <i>disadvantageous</i>                                | 3419 | 5.48 | 1.96               | -1.09    | -0.06    |
|                                    | att3*     | Getting vaccinated against the coronavirus is ...                                                                      | 1 <i>gratifying</i> to 7 <i>not gratifying</i>                                 | 3424 | 5.01 | 2.17               | -0.72    | -0.9     |
|                                    | att4      | Getting a vaccination against the coronavirus is ...                                                                   | 1 <i>unpleasant</i> to 7 <i>pleasant</i>                                       | 3286 | 4.28 | 1.91               | -0.27    | -0.91    |
| Subjective norm (SN)               | sn1*      | Most of people who means something to me would find it very good if I got the coronavirus vaccine.                     | 1 <i>completely true</i> to 7 <i>not true at all</i>                           | 3327 | 5.03 | 2.09               | -0.69    | -0.88    |
|                                    | sn2*      | Most people whose opinion is important to me expect me to get the coronavirus vaccination.                             | 1 <i>completely true</i> to 7 <i>not true at all</i>                           | 3339 | 4.44 | 2.14               | -0.38    | -1.18    |
|                                    | sn3*      | Most people like me will get the coronavirus vaccine.                                                                  | 1 <i>very likely</i> to 7 <i>very unlikely</i>                                 | 3373 | 5.06 | 1.94               | -0.8     | -0.5     |
|                                    | sn4*      | Most of the people whose opinion I care about will get the coronavirus vaccine when it is their turn.                  | 1 <i>completely true</i> to 7 <i>not true at all</i>                           | 3360 | 5.14 | 1.86               | -0.83    | -0.34    |
| Perceived behavioral control (PBC) | pb1*      | To what extent do you feel that - when it is your turn - a vaccination against the coronavirus is within your control? | 1 <i>completely within my control</i> to 7 <i>completely out of my control</i> | 3369 | 4.75 | 1.95               | -0.55    | -0.82    |
|                                    | pb2*      | If I wanted to and it was my turn, I could easily get vaccinated against the coronavirus.                              | 1 <i>completely true</i> to 7 <i>not true at all</i>                           | 3404 | 5.24 | 2.05               | -0.88    | -0.57    |
|                                    | pb3*      | How sure are you that you could get the coronavirus vaccine when it is your turn?                                      | 1 <i>very sure</i> to 7 <i>not sure at all</i>                                 | 3447 | 5.32 | 2.04               | -1.01    | -0.31    |
|                                    | pb4*      | When it is my turn, it is entirely up to me whether I can get vaccinated against the coronavirus.                      | 1 <i>completely true</i> to 7 <i>not true at all</i>                           | 3456 | 5.94 | 1.57               | -1.53    | 1.48     |
| COVID-19 conspiracy beliefs (CCB)  | ccb1      | The virus is a hoax.                                                                                                   | 1 <i>not true at all</i> to 7 <i>completely true</i>                           | 3461 | 1.98 | 1.60               | 1.63     | 1.69     |
|                                    | ccb2      | COVID-19 is a bio-weapon developed by China to destroy the West.                                                       | 1 <i>not true at all</i> to 7 <i>completely true</i>                           | 3321 | 2.22 | 1.69               | 1.28     | 0.63     |
|                                    | ccb3      | The corona vaccine is a biological weapon made by the United States.                                                   | 1 <i>not true at all</i> to 7 <i>completely true</i>                           | 3303 | 1.76 | 1.31               | 1.90     | 3.16     |
|                                    | ccb4      | Jews created the virus to benefit from the economic collapse.                                                          | 1 <i>not true at all</i> to 7 <i>completely true</i>                           | 3354 | 1.43 | 1.09               | 3.07     | 9.83     |
|                                    | ccb5      | Bill Gates developed the corona vaccine to reduce the world's population.                                              | 1 <i>not true at all</i> to 7 <i>completely true</i>                           | 3367 | 1.62 | 1.35               | 2.43     | 5.32     |
|                                    | ccb6      | The pharmaceutical industry developed COVID-19 to benefit from the vaccines.                                           | 1 <i>not true at all</i> to 7 <i>completely true</i>                           | 3369 | 2.04 | 1.64               | 1.57     | 1.53     |

|                                     |        |                                                                                                                                       |                                               |      |      |      |       |       |
|-------------------------------------|--------|---------------------------------------------------------------------------------------------------------------------------------------|-----------------------------------------------|------|------|------|-------|-------|
|                                     | ccb7   | COVID-19 is being used by the government to establish a police state.                                                                 | <i>1 not true at all to 7 completely true</i> | 3370 | 2.01 | 1.68 | 1.65  | 1.62  |
|                                     | ccb8   | The vaccine is used for mass sterilization.                                                                                           | <i>1 not true at all to 7 completely true</i> | 3321 | 1.70 | 1.41 | 2.21  | 4.26  |
| General conspiracy mindedness (GCM) | gcm1   | There are many very important things happening in the world that the public is never informed about.                                  | <i>1 not true at all to 7 completely true</i> | 3490 | 5.40 | 1.55 | -0.77 | -0.14 |
|                                     | gcm2   | Politicians usually do not give us any information about the real motives for their decisions.                                        | <i>1 not true at all to 7 completely true</i> | 3479 | 5.16 | 1.53 | -0.58 | -0.29 |
|                                     | gcm3   | Government agencies closely monitor all citizens.                                                                                     | <i>1 not true at all to 7 completely true</i> | 3453 | 3.96 | 1.75 | 0.10  | -0.84 |
|                                     | gcm4   | Events that at first glance seem unrelated are often the result of secret activities.                                                 | <i>1 not true at all to 7 completely true</i> | 3351 | 3.85 | 1.75 | 0.09  | -0.80 |
|                                     | gcm5   | There are secret organizations that have a great influence on political decisions.                                                    | <i>1 not true at all to 7 completely true</i> | 3361 | 4.15 | 1.84 | -0.09 | -0.95 |
| Skepticism toward vaccines (SKV)    | skv1   | Vaccination safety data is often faked.                                                                                               | <i>1 not true at all to 7 completely true</i> | 3156 | 3.23 | 1.71 | 0.51  | -0.55 |
|                                     | skv2   | Pharmaceutical companies conceal the dangers of vaccines.                                                                             | <i>1 not true at all to 7 completely true</i> | 3360 | 3.93 | 1.81 | 0.09  | -0.96 |
|                                     | skv3   | People are being deceived about the effectiveness of the vaccine.                                                                     | <i>1 not true at all to 7 completely true</i> | 3329 | 3.60 | 1.81 | 0.32  | -0.86 |
| Skepticism toward doctors (SKD)     | skd1   | Most diseases heal on their own without consulting a doctor.                                                                          | <i>1 not true at all to 7 completely true</i> | 3473 | 3.62 | 1.56 | 0.02  | -0.49 |
|                                     | sdkd2  | People rely too heavily on their doctors instead of themselves to live healthy lives.                                                 | <i>1 not true at all to 7 completely true</i> | 3465 | 4.21 | 1.59 | -0.16 | -0.47 |
|                                     | sdkd3* | It is best to follow the doctor's instructions.                                                                                       | <i>1 not true at all to 7 completely true</i> | 3471 | 2.78 | 1.27 | 0.71  | 0.53  |
| Fear of COVID-19 (FCV)              | fcv1   | When I think about the coronavirus, I feel threatened.                                                                                | <i>1 not true at all to 7 completely true</i> | 3497 | 4.49 | 1.85 | -0.41 | -0.85 |
|                                     | fcv2   | I worry that I or people I love could get sick from the coronavirus.                                                                  | <i>1 not true at all to 7 completely true</i> | 3499 | 5.14 | 1.83 | -0.84 | -0.33 |
|                                     | fcv3   | I am stressed around other people because I fear I might catch the coronavirus.                                                       | <i>1 not true at all to 7 completely true</i> | 3498 | 3.54 | 1.87 | 0.19  | -1.03 |
| Trust in politics (TPO)             |        | We name a number of institutions, public institutions or groups of people. Please tell us how much you personally trust each of them. |                                               |      |      |      |       |       |
|                                     | tpo1   | Federal government                                                                                                                    | <i>1 no trust at all to 7 a lot of trust</i>  | 3484 | 3.37 | 1.88 | 0.12  | -1.26 |
|                                     | tpo2   | Parliament (Bundestag)                                                                                                                | <i>1 no trust at all to 7 a lot of trust</i>  | 3478 | 3.36 | 1.84 | 0.13  | -1.18 |
|                                     | tpo3   | Government of your federal state                                                                                                      | <i>1 no trust at all to 7 a lot of trust</i>  | 3477 | 3.54 | 1.88 | 0.05  | -1.21 |
|                                     | tpo4   | Local administration                                                                                                                  | <i>1 no trust at all to 7 a lot of trust</i>  | 3462 | 3.74 | 1.78 | -0.14 | -1.04 |
|                                     | tpo5   | Politicians                                                                                                                           | <i>1 no trust at all to 7 a lot of trust</i>  | 3477 | 2.89 | 1.69 | 0.40  | -0.97 |
|                                     | tpo6   | European Union                                                                                                                        | <i>1 no trust at all to 7 a lot of trust</i>  | 3466 | 3.07 | 1.76 | 0.31  | -1.07 |
| Trust in science (TSC)              | tsc1   | Doctors/Medical professionals                                                                                                         | <i>1 no trust at all to 7 a lot of trust</i>  | 3492 | 5.15 | 1.60 | -0.86 | 0.18  |
|                                     | tsc2   | Science                                                                                                                               | <i>1 no trust at all to 7 a lot of trust</i>  | 3488 | 4.90 | 1.77 | -0.68 | -0.43 |
|                                     | tsc3   | Robert Koch Institute (RKI)                                                                                                           | <i>1 no trust at all to 7 a lot of trust</i>  | 3488 | 4.51 | 2.02 | -0.49 | -1.03 |
|                                     | tsc4   | Conventional medicine                                                                                                                 | <i>1 no trust at all to 7 a lot of trust</i>  | 3440 | 4.48 | 1.76 | -0.48 | -0.65 |

|                        |         |                                                                                                                                                     |                                                                                                    |      |      |      |       |       |
|------------------------|---------|-----------------------------------------------------------------------------------------------------------------------------------------------------|----------------------------------------------------------------------------------------------------|------|------|------|-------|-------|
| Self-rated health      | health* | Overall, how do you rate your state of health?<br>Would you say it is ...                                                                           | 1 <i>very bad</i> to 5 <i>very good</i>                                                            | 3517 | 3.43 | 0.92 | -0.42 | -0.03 |
| COVID-19 risk          | risk    | Are you exposed to a higher risk of a severe course of COVID-19 (e.g. over 70 years of age, previous illness, pregnancy)?                           | 1 <i>low risk</i> (53.74 %)<br>2 <i>medium risk</i> (31.00 %)<br>3 <i>very high risk</i> (15.27 %) | 3413 |      |      |       |       |
| Religiosity            | rel     | How important is religion in your life?                                                                                                             | 1 <i>not important at all</i> to 7 <i>very important</i>                                           | 3458 | 2.67 | 1.90 | 0.83  | -0.56 |
| Political orientation  | pol     | In politics, people sometimes talk about "left" and "right". Where on this scale would you classify yourself if 0 stands for left and 10 for right? | 0 <i>left</i> to 10 <i>right</i>                                                                   | 3261 | 4.86 | 1.95 | -0.12 | 0.62  |
| Age                    | age     |                                                                                                                                                     | 1 < 30 <i>age</i> (20.70 %)<br>2 ≥ 30 <i>age</i> < 60 (60.82 %)<br>3 ≥ 60 <i>age</i> (19.17 %)     | 3532 |      |      |       |       |
| Gender                 | male    |                                                                                                                                                     | 0 <i>female</i> (50.43 %)<br>1 <i>male</i> (49.57 %)                                               | 3532 |      |      |       |       |
| Education              | edu     |                                                                                                                                                     | 0 <i>below tertiary</i> (77.66 %)<br>1 <i>lower and higher tertiary</i> (22.34 %)                  | 3532 |      |      |       |       |
| Income                 | inc     |                                                                                                                                                     | 0 ≤ 4000€ (75.57 %)<br>1 > 4000€ (24.43 %)                                                         | 3532 |      |      |       |       |
| Immigration background | imm     |                                                                                                                                                     | 0 <i>no immigration background</i> (81.91 %)<br>1 <i>immigration background</i> (18.09 %)          | 3532 |      |      |       |       |
| Partnership status     | part    |                                                                                                                                                     | 0 <i>single/divorced/widowed</i> (39.59 %)<br>1 <i>married/cohabitating</i> (60.41 %)              | 3511 |      |      |       |       |
| Living with kids       | kids    | Do you have a child who is going to kindergarten or school?                                                                                         | 0 <i>no</i> (75.42 %)<br>1 <i>yes</i> (24.58 %)                                                    | 3507 |      |      |       |       |

\* Indicator was reversely coded in the questionnaire.

## A2. Exploratory factor analysis.

```

> ### EFA for the TPB indicators
> x1<-data.frame(int1,int2,int3,att1,att2,att3,att4,sn1,sn2,sn3,sn4,pcb1,pcb2,pcb3,pcb4)
> efa1<-fa(x1,nfactors=4,fm="pa",rotate="oblimin")
> efa1
Factor Analysis using method = pa
Call: fa(r = x1, nfactors = 4, rotate = "oblimin", fm = "pa")
Standardized loadings (pattern matrix) based upon correlation matrix
      PA1  PA3  PA4  PA2  h2  u2  com
int1 0.12 0.07 0.14 0.60 0.65 0.35 1.2
int2 0.28 0.01 0.09 0.60 0.74 0.26 1.5
int3 0.71 0.13 0.04 0.14 0.90 0.10 1.1
att1 0.89 0.04 -0.02 0.05 0.89 0.11 1.0
att2 0.74 0.13 0.02 0.06 0.82 0.18 1.1
att3 0.91 0.03 0.01 0.01 0.90 0.10 1.0
att4 0.69 -0.03 0.02 0.08 0.53 0.47 1.0
sn1  0.19 0.69 -0.01 -0.04 0.67 0.33 1.2
sn2 -0.03 0.84 -0.01 0.02 0.66 0.34 1.0
sn3  0.11 0.61 0.13 0.09 0.73 0.27 1.2
sn4 -0.02 0.88 0.03 -0.03 0.74 0.26 1.0
pcb1 0.55 -0.06 0.25 -0.24 0.36 0.64 1.8
pcb2 -0.07 0.09 0.72 0.03 0.54 0.46 1.1
pcb3 0.11 0.06 0.64 0.13 0.67 0.33 1.2
pcb4 0.32 -0.09 0.33 -0.24 0.21 0.79 3.0

      PA1  PA3  PA4  PA2
SS loadings      4.44 2.83 1.54 1.20
Proportion Var   0.30 0.19 0.10 0.08
Cumulative Var   0.30 0.48 0.59 0.67
Proportion Explained 0.44 0.28 0.15 0.12
Cumulative Proportion 0.44 0.73 0.88 1.00

With factor correlations of
      PA1  PA3  PA4  PA2
PA1 1.00 0.84 0.71 0.65
PA3 0.84 1.00 0.60 0.48
PA4 0.71 0.60 1.00 0.29
PA2 0.65 0.48 0.29 1.00

Mean item complexity = 1.3
Test of the hypothesis that 4 factors are sufficient.

The degrees of freedom for the null model are 105 and the objective function was 12.89 with
Chi Square of 45438.4
The degrees of freedom for the model are 51 and the objective function was 0.24

The root mean square of the residuals (RMSR) is 0.02
The df corrected root mean square of the residuals is 0.02

The harmonic number of observations is 3330 with the empirical chi square 167.31 with prob
< 2.7e-14
The total number of observations was 3532 with Likelihood Chi Square = 851.19 with prob <
1.3e-145

Tucker Lewis Index of factoring reliability = 0.964
RMSEA index = 0.067 and the 90 % confidence intervals are 0.063 0.071
BIC = 434.54
Fit based upon off diagonal values = 1
Measures of factor score adequacy
      PA1  PA3  PA4  PA2
Correlation of (regression) scores with factors 0.98 0.96 0.88 0.88
Multiple R square of scores with factors 0.97 0.91 0.78 0.78
Minimum correlation of possible factor scores 0.94 0.83 0.56 0.55
>
> ### EFA for the background factor indicators
> x2<-
data.frame(ccb1,ccb2,ccb3,ccb4,ccb5,ccb6,ccb7,ccb8,gcm1,gcm2,gcm3,gcm4,gcm5,skv1,skv2,skv3,skd
1,skd2,skd3,fcv1,fcv2,fcv3,tpo1,tpo2,tpo3,tpo4,tpo5,tpo6,tsc1,tsc2,tsc3,tsc4)
> efa2<-fa(x2,7,fm="pa",rotate="oblimin")
> efa2
Factor Analysis using method = pa
Call: fa(r = x2, nfactors = 7, rotate = "oblimin", fm = "pa")
Standardized loadings (pattern matrix) based upon correlation matrix
      PA2  PA1  PA4  PA5  PA7  PA3  PA6  h2  u2  com

```

|      |       |       |       |       |       |       |       |      |       |     |
|------|-------|-------|-------|-------|-------|-------|-------|------|-------|-----|
| ccb1 | 0.58  | -0.04 | 0.06  | -0.13 | 0.02  | -0.17 | 0.04  | 0.63 | 0.372 | 1.3 |
| ccb2 | 0.61  | -0.03 | 0.16  | -0.02 | 0.06  | 0.11  | -0.02 | 0.53 | 0.474 | 1.2 |
| ccb3 | 0.82  | -0.01 | 0.05  | -0.01 | -0.03 | 0.07  | 0.02  | 0.70 | 0.303 | 1.0 |
| ccb4 | 0.84  | 0.02  | -0.12 | 0.04  | 0.00  | 0.08  | 0.05  | 0.63 | 0.371 | 1.1 |
| ccb5 | 0.86  | -0.02 | -0.04 | 0.00  | 0.00  | -0.04 | 0.01  | 0.74 | 0.263 | 1.0 |
| ccb6 | 0.73  | -0.05 | 0.06  | 0.00  | 0.08  | -0.04 | 0.02  | 0.70 | 0.295 | 1.1 |
| ccb7 | 0.68  | -0.10 | 0.08  | 0.03  | 0.07  | -0.14 | -0.01 | 0.68 | 0.324 | 1.2 |
| ccb8 | 0.83  | 0.01  | 0.04  | -0.04 | -0.01 | -0.04 | 0.00  | 0.74 | 0.263 | 1.0 |
| gcm1 | -0.12 | -0.11 | 0.74  | 0.01  | -0.02 | -0.01 | 0.09  | 0.61 | 0.389 | 1.1 |
| gcm2 | -0.07 | -0.24 | 0.69  | 0.08  | 0.02  | -0.03 | 0.06  | 0.66 | 0.343 | 1.3 |
| gcm3 | 0.14  | 0.01  | 0.63  | -0.10 | 0.09  | 0.00  | 0.01  | 0.65 | 0.348 | 1.2 |
| gcm4 | 0.15  | 0.09  | 0.73  | -0.11 | 0.11  | 0.01  | -0.01 | 0.76 | 0.238 | 1.2 |
| gcm5 | 0.11  | 0.06  | 0.68  | -0.05 | 0.08  | -0.01 | 0.04  | 0.63 | 0.365 | 1.1 |
| skv1 | 0.08  | 0.03  | 0.01  | -0.07 | 0.74  | 0.04  | 0.04  | 0.70 | 0.300 | 1.1 |
| skv2 | -0.06 | -0.02 | 0.01  | 0.04  | 0.95  | 0.00  | 0.01  | 0.85 | 0.155 | 1.0 |
| skv3 | 0.01  | -0.01 | 0.00  | -0.01 | 0.91  | -0.03 | 0.00  | 0.88 | 0.125 | 1.0 |
| skd1 | 0.05  | 0.01  | -0.03 | -0.01 | -0.01 | -0.04 | 0.71  | 0.53 | 0.465 | 1.0 |
| skd2 | -0.02 | 0.00  | 0.04  | 0.00  | 0.03  | 0.02  | 0.75  | 0.60 | 0.403 | 1.0 |
| skd3 | 0.05  | 0.02  | -0.05 | -0.33 | 0.06  | -0.12 | 0.15  | 0.26 | 0.735 | 1.9 |
| fcv1 | -0.01 | -0.02 | 0.00  | 0.00  | 0.01  | 0.84  | -0.01 | 0.69 | 0.310 | 1.0 |
| fcv2 | -0.07 | 0.00  | 0.05  | 0.05  | -0.05 | 0.80  | -0.01 | 0.72 | 0.279 | 1.0 |
| fcv3 | 0.09  | 0.04  | -0.05 | -0.01 | 0.04  | 0.73  | -0.03 | 0.55 | 0.454 | 1.1 |
| tpo1 | -0.03 | 0.93  | -0.01 | -0.02 | -0.01 | 0.03  | -0.02 | 0.91 | 0.091 | 1.0 |
| tpo2 | -0.02 | 0.92  | -0.01 | 0.01  | -0.01 | 0.01  | -0.01 | 0.91 | 0.090 | 1.0 |
| tpo3 | -0.05 | 0.86  | 0.05  | 0.05  | -0.03 | -0.01 | -0.01 | 0.80 | 0.195 | 1.0 |
| tpo4 | -0.03 | 0.70  | 0.06  | 0.19  | -0.04 | -0.06 | 0.00  | 0.69 | 0.314 | 1.2 |
| tpo5 | 0.02  | 0.92  | -0.06 | -0.05 | 0.01  | 0.02  | 0.00  | 0.84 | 0.156 | 1.0 |
| tpo6 | 0.04  | 0.78  | -0.06 | 0.06  | -0.02 | -0.01 | 0.00  | 0.72 | 0.283 | 1.0 |
| tsc1 | -0.01 | -0.01 | 0.01  | 0.85  | 0.02  | 0.00  | -0.05 | 0.73 | 0.267 | 1.0 |
| tsc2 | -0.02 | 0.00  | -0.05 | 0.82  | -0.04 | 0.02  | 0.01  | 0.77 | 0.226 | 1.0 |
| tsc3 | -0.02 | 0.22  | -0.03 | 0.57  | -0.06 | 0.15  | 0.00  | 0.75 | 0.247 | 1.5 |
| tsc4 | 0.04  | 0.09  | -0.03 | 0.72  | -0.03 | -0.02 | -0.01 | 0.63 | 0.372 | 1.0 |

|                       | PA2  | PA1  | PA4  | PA5  | PA7  | PA3  | PA6  |
|-----------------------|------|------|------|------|------|------|------|
| SS loadings           | 5.00 | 4.99 | 2.96 | 3.02 | 2.77 | 2.13 | 1.32 |
| Proportion Var        | 0.16 | 0.16 | 0.09 | 0.09 | 0.09 | 0.07 | 0.04 |
| Cumulative Var        | 0.16 | 0.31 | 0.40 | 0.50 | 0.59 | 0.65 | 0.69 |
| Proportion Explained  | 0.23 | 0.23 | 0.13 | 0.14 | 0.12 | 0.10 | 0.06 |
| Cumulative Proportion | 0.23 | 0.45 | 0.58 | 0.72 | 0.84 | 0.94 | 1.00 |

With factor correlations of

|     | PA2   | PA1   | PA4   | PA5   | PA7   | PA3   | PA6   |
|-----|-------|-------|-------|-------|-------|-------|-------|
| PA2 | 1.00  | -0.25 | 0.37  | -0.45 | 0.51  | -0.19 | 0.36  |
| PA1 | -0.25 | 1.00  | -0.49 | 0.65  | -0.52 | 0.34  | -0.31 |
| PA4 | 0.37  | -0.49 | 1.00  | -0.37 | 0.64  | -0.14 | 0.39  |
| PA5 | -0.45 | 0.65  | -0.37 | 1.00  | -0.61 | 0.38  | -0.41 |
| PA7 | 0.51  | -0.52 | 0.64  | -0.61 | 1.00  | -0.24 | 0.51  |
| PA3 | -0.19 | 0.34  | -0.14 | 0.38  | -0.24 | 1.00  | -0.33 |
| PA6 | 0.36  | -0.31 | 0.39  | -0.41 | 0.51  | -0.33 | 1.00  |

Mean item complexity = 1.1

Test of the hypothesis that 7 factors are sufficient.

The degrees of freedom for the null model are 496 and the objective function was 27.17 with Chi Square of 95619.98

The degrees of freedom for the model are 293 and the objective function was 0.98

The root mean square of the residuals (RMSR) is 0.01

The df corrected root mean square of the residuals is 0.02

The harmonic number of observations is 3352 with the empirical chi square 606.15 with prob < 5.4e-24

The total number of observations was 3532 with Likelihood Chi Square = 3442.98 with prob < 0

Tucker Lewis Index of factoring reliability = 0.944

RMSEA index = 0.055 and the 90 % confidence intervals are 0.054 0.057

BIC = 1049.28

Fit based upon off diagonal values = 1

Measures of factor score adequacy

|                                                 | PA2  | PA1  | PA4  | PA5  | PA7  | PA3  | PA6  |
|-------------------------------------------------|------|------|------|------|------|------|------|
| Correlation of (regression) scores with factors | 0.97 | 0.98 | 0.95 | 0.95 | 0.97 | 0.93 | 0.87 |
| Multiple R square of scores with factors        | 0.94 | 0.97 | 0.89 | 0.91 | 0.94 | 0.86 | 0.75 |
| Minimum correlation of possible factor scores   | 0.88 | 0.94 | 0.79 | 0.82 | 0.88 | 0.73 | 0.51 |

Variable abbreviations are presented in A1.

The EFA for the TPB indicators showed that most indicators loaded on their respective factors and all factors had Eigenvalues  $> 1$ . Indicator int3 had a strong cross-loading on the attitude factor (PA1). Indicator int2—although loading on one factor with int1—had strong bivariate correlations with the attitude indicators, while indicator int1 was least strongly correlated with the attitude indicators. Therefore, we decided to use only indicator int1 as the dependent variable for our analyses and to exclude int2 and int3 from further considerations. For the remaining constructs we use only two indicators per construct, those with the highest factor loadings and the least overlap with other constructs: att1 (instrumental) & att3 (experiential), sn2 (injunctive) & sn4 (descriptive), pbc2 (capacity) & pbc3 (autonomy).

The EFA for the background factor indicators showed a simple structure with Eigenvalues  $> 1$  for all factors with one exception: indicator skd3 had a negative cross-loading on the trust in science factor (PA5). Therefore, this indicator was not considered any further.

### A3. Confirmatory factor analysis.

```

> ##### Measurement models (CFA)
> ### CFA
> cfal <- '
+ INT=~1*int1
+ int1~~0*int1
+ ATT=~att1+att3
+ SN =~sn2 + sn4
+ PBC=~pbc2+pbc3'
> fcfal <- cfa(cfal,data=tpb_data,missing="FIML",estimator="MLR")
Warnmeldung:
In lav_data_full(data = data, group = group, cluster = cluster, :
lavaan WARNING: some cases are empty and will be ignored:
173 262 470 1001 1141 1610 1811 2366 2375 2400 2650 2651 2657 2674 2688 2702 2710 2813 2833
2848 2865 3009 3153 3340 3511
> summary(fcfal,fit.measures=TRUE,standardized=TRUE)
lavaan 0.6-9 ended normally after 61 iterations

Estimator ML
Optimization method NLMINB
Number of model parameters 26

Number of observations Used Total
Number of missing patterns 52 3507 3532

Model Test User Model:

Test Statistic Standard Robust
Degrees of freedom 32.268 27.274
P-value (Chi-square) 9 9
Scaling correction factor 0.000 0.001
Yuan-Bentler correction (Mplus variant) 1.183

Model Test Baseline Model:

Test statistic 15963.289 9323.875
Degrees of freedom 21 21
P-value 0.000 0.000
Scaling correction factor 1.712

User Model versus Baseline Model:

Comparative Fit Index (CFI) 0.999 0.998
Tucker-Lewis Index (TLI) 0.997 0.995

Robust Comparative Fit Index (CFI) 0.999
Robust Tucker-Lewis Index (TLI) 0.997

Loglikelihood and Information Criteria:

Loglikelihood user model (H0) -43723.806 -43723.806
Scaling correction factor 1.411
for the MLR correction
Loglikelihood unrestricted model (H1) -43707.672 -43707.672
Scaling correction factor 1.352
for the MLR correction

Akaike (AIC) 87499.611 87499.611
Bayesian (BIC) 87659.837 87659.837
Sample-size adjusted Bayesian (BIC) 87577.222 87577.222

Root Mean Square Error of Approximation:

RMSEA 0.027 0.024
90 Percent confidence interval - lower 0.017 0.015
90 Percent confidence interval - upper 0.038 0.034
P-value RMSEA <= 0.05 1.000 1.000

Robust RMSEA 0.026
90 Percent confidence interval - lower 0.015
90 Percent confidence interval - upper 0.038

Standardized Root Mean Square Residual:

```



SRMR 0.006 0.006

Parameter Estimates:

Standard errors Sandwich  
 Information bread Observed  
 Observed information based on Hessian

Latent Variables:

|        | Estimate | Std.Err | z-value | P(> z ) | Std.lv | Std.all |
|--------|----------|---------|---------|---------|--------|---------|
| INT =~ |          |         |         |         |        |         |
| int1   | 1.000    |         |         |         | 2.456  | 1.000   |
| ATT =~ |          |         |         |         |        |         |
| att1   | 1.000    |         |         |         | 1.949  | 0.940   |
| att3   | 1.057    | 0.010   | 103.535 | 0.000   | 2.060  | 0.944   |
| SN =~  |          |         |         |         |        |         |
| sn2    | 1.000    |         |         |         | 1.741  | 0.816   |
| sn4    | 0.911    | 0.020   | 46.338  | 0.000   | 1.586  | 0.850   |
| PBC =~ |          |         |         |         |        |         |
| pbc2   | 1.000    |         |         |         | 1.425  | 0.691   |
| pbc3   | 1.291    | 0.041   | 31.459  | 0.000   | 1.840  | 0.895   |

Covariances:

|        | Estimate | Std.Err | z-value | P(> z ) | Std.lv | Std.all |
|--------|----------|---------|---------|---------|--------|---------|
| INT ~~ |          |         |         |         |        |         |
| ATT    | 3.307    | 0.090   | 36.786  | 0.000   | 0.691  | 0.691   |
| SN     | 2.391    | 0.084   | 28.373  | 0.000   | 0.559  | 0.559   |
| PBC    | 1.879    | 0.081   | 23.304  | 0.000   | 0.537  | 0.537   |
| ATT ~~ |          |         |         |         |        |         |
| SN     | 2.880    | 0.077   | 37.581  | 0.000   | 0.849  | 0.849   |
| PBC    | 2.210    | 0.084   | 26.326  | 0.000   | 0.796  | 0.796   |
| SN ~~  |          |         |         |         |        |         |
| PBC    | 1.710    | 0.074   | 23.090  | 0.000   | 0.690  | 0.690   |

Intercepts:

|       | Estimate | Std.Err | z-value | P(> z ) | Std.lv | Std.all |
|-------|----------|---------|---------|---------|--------|---------|
| .int1 | 4.752    | 0.041   | 114.514 | 0.000   | 4.752  | 1.935   |
| .att1 | 5.246    | 0.035   | 148.460 | 0.000   | 5.246  | 2.529   |
| .att3 | 4.975    | 0.037   | 134.254 | 0.000   | 4.975  | 2.278   |
| .sn2  | 4.436    | 0.036   | 121.570 | 0.000   | 4.436  | 2.078   |
| .sn4  | 5.104    | 0.032   | 159.395 | 0.000   | 5.104  | 2.736   |
| .pbc2 | 5.193    | 0.035   | 146.575 | 0.000   | 5.193  | 2.518   |
| .pbc3 | 5.282    | 0.035   | 150.184 | 0.000   | 5.282  | 2.569   |
| INT   | 0.000    |         |         |         | 0.000  | 0.000   |
| ATT   | 0.000    |         |         |         | 0.000  | 0.000   |
| SN    | 0.000    |         |         |         | 0.000  | 0.000   |
| PBC   | 0.000    |         |         |         | 0.000  | 0.000   |

Variances:

|       | Estimate | Std.Err | z-value | P(> z ) | Std.lv | Std.all |
|-------|----------|---------|---------|---------|--------|---------|
| .int1 | 0.000    |         |         |         | 0.000  | 0.000   |
| .att1 | 0.504    | 0.035   | 14.540  | 0.000   | 0.504  | 0.117   |
| .att3 | 0.522    | 0.040   | 13.216  | 0.000   | 0.522  | 0.110   |
| .sn2  | 1.526    | 0.078   | 19.455  | 0.000   | 1.526  | 0.335   |
| .sn4  | 0.965    | 0.063   | 15.405  | 0.000   | 0.965  | 0.277   |
| .pbc2 | 2.225    | 0.097   | 22.950  | 0.000   | 2.225  | 0.523   |
| .pbc3 | 0.843    | 0.093   | 9.071   | 0.000   | 0.843  | 0.199   |
| INT   | 6.031    | 0.074   | 80.980  | 0.000   | 1.000  | 1.000   |
| ATT   | 3.800    | 0.093   | 40.656  | 0.000   | 1.000  | 1.000   |
| SN    | 3.029    | 0.095   | 32.003  | 0.000   | 1.000  | 1.000   |
| PBC   | 2.030    | 0.108   | 18.792  | 0.000   | 1.000  | 1.000   |

> reliability(fcfal,return.total=TRUE)

|        | ATT       | SN        | PBC       | total     |
|--------|-----------|-----------|-----------|-----------|
| alpha  | 0.9392933 | 0.8144894 | 0.7639231 | 0.9035970 |
| omega  | 0.9399827 | 0.8163134 | 0.7764513 | 0.9530377 |
| omega2 | 0.9399827 | 0.8163134 | 0.7764513 | 0.9530377 |
| omega3 | 0.9398696 | 0.8164165 | 0.7764710 | 0.9529424 |
| avevar | 0.8868386 | 0.6900957 | 0.6383003 | 0.7917502 |

>

> cfa2 <-'

+ CCB=~ccb1+ccb2+ccb3+ccb4+ccb5+ccb6+ccb7+ccb8  
 + GCM=~gcm1+gcm2+gcm3+gcm4+gcm5  
 + SKV=~skv1+skv2+skv3

```

+ SKD=~skd1+skd2
+ FCV=~fcv1+fcv2+fcv3
+ TPO=~tpo1+tpo2+tpo3+tpo4+tpo5+tpo6
+ TSC=~tsc1+tsc2+tsc3+tsc4'
> fcfa2 <- cfa(cfa2,data=tpb_data,missing="FIML",estimator="MLR")
Warnmeldung:
In lav_data_full(data = data, group = group, cluster = cluster, :
lavaan WARNING: some cases are empty and will be ignored:
173 2174 2216 2366 2375 2400 2650 2651 2657 2702 2710 2813 2833 3153 3511
> summary(fcfa2,fit.measures=TRUE,standardized=TRUE)
lavaan 0.6-9 ended normally after 116 iterations

```

|                            |        |       |
|----------------------------|--------|-------|
| Estimator                  | ML     |       |
| Optimization method        | NLMINB |       |
| Number of model parameters | 114    |       |
|                            | Used   | Total |
| Number of observations     | 3517   | 3532  |
| Number of missing patterns | 335    |       |

Model Test User Model:

|                                         |          |          |
|-----------------------------------------|----------|----------|
|                                         | Standard | Robust   |
| Test Statistic                          | 6272.432 | 4984.719 |
| Degrees of freedom                      | 413      | 413      |
| P-value (Chi-square)                    | 0.000    | 0.000    |
| Scaling correction factor               |          | 1.258    |
| Yuan-Bentler correction (Mplus variant) |          |          |

Model Test Baseline Model:

|                           |           |           |
|---------------------------|-----------|-----------|
| Test statistic            | 90989.877 | 67559.172 |
| Degrees of freedom        | 465       | 465       |
| P-value                   | 0.000     | 0.000     |
| Scaling correction factor |           | 1.347     |

User Model versus Baseline Model:

|                                    |       |       |
|------------------------------------|-------|-------|
| Comparative Fit Index (CFI)        | 0.935 | 0.932 |
| Tucker-Lewis Index (TLI)           | 0.927 | 0.923 |
| Robust Comparative Fit Index (CFI) |       | 0.936 |
| Robust Tucker-Lewis Index (TLI)    |       | 0.928 |

Loglikelihood and Information Criteria:

|                                       |             |             |
|---------------------------------------|-------------|-------------|
| Loglikelihood user model (H0)         | -162638.089 | -162638.089 |
| Scaling correction factor             |             | 1.526       |
| for the MLR correction                |             |             |
| Loglikelihood unrestricted model (H1) | -159501.872 | -159501.872 |
| Scaling correction factor             |             | 1.316       |
| for the MLR correction                |             |             |
| Akaike (AIC)                          | 325504.177  | 325504.177  |
| Bayesian (BIC)                        | 326207.029  | 326207.029  |
| Sample-size adjusted Bayesian (BIC)   | 325844.795  | 325844.795  |

Root Mean Square Error of Approximation:

|                                        |       |       |
|----------------------------------------|-------|-------|
| RMSEA                                  | 0.064 | 0.056 |
| 90 Percent confidence interval - lower | 0.062 | 0.055 |
| 90 Percent confidence interval - upper | 0.065 | 0.057 |
| P-value RMSEA <= 0.05                  | 0.000 | 0.000 |
| Robust RMSEA                           |       | 0.063 |
| 90 Percent confidence interval - lower |       | 0.061 |
| 90 Percent confidence interval - upper |       | 0.065 |

Standardized Root Mean Square Residual:

|      |       |       |
|------|-------|-------|
| SRMR | 0.053 | 0.053 |
|------|-------|-------|

Parameter Estimates:

|                   |          |
|-------------------|----------|
| Standard errors   | Sandwich |
| Information bread | Observed |

| Observed information based on |          |         |         | Hessian |        |         |
|-------------------------------|----------|---------|---------|---------|--------|---------|
| Latent Variables:             |          |         |         |         |        |         |
|                               | Estimate | Std.Err | z-value | P(> z ) | Std.lv | Std.all |
| CCB =~                        |          |         |         |         |        |         |
| ccb1                          | 1.000    |         |         |         | 1.230  | 0.767   |
| ccb2                          | 0.977    | 0.027   | 35.999  | 0.000   | 1.201  | 0.706   |
| ccb3                          | 0.890    | 0.027   | 33.412  | 0.000   | 1.094  | 0.822   |
| ccb4                          | 0.678    | 0.031   | 21.978  | 0.000   | 0.834  | 0.750   |
| ccb5                          | 0.949    | 0.028   | 33.521  | 0.000   | 1.167  | 0.852   |
| ccb6                          | 1.143    | 0.027   | 41.713  | 0.000   | 1.405  | 0.852   |
| ccb7                          | 1.130    | 0.028   | 39.827  | 0.000   | 1.390  | 0.821   |
| ccb8                          | 1.011    | 0.026   | 39.201  | 0.000   | 1.244  | 0.866   |
| GCM =~                        |          |         |         |         |        |         |
| gcm1                          | 1.000    |         |         |         | 1.102  | 0.713   |
| gcm2                          | 1.034    | 0.018   | 57.582  | 0.000   | 1.139  | 0.743   |
| gcm3                          | 1.305    | 0.031   | 41.857  | 0.000   | 1.438  | 0.822   |
| gcm4                          | 1.390    | 0.034   | 41.336  | 0.000   | 1.532  | 0.879   |
| gcm5                          | 1.333    | 0.031   | 42.469  | 0.000   | 1.469  | 0.803   |
| SKV =~                        |          |         |         |         |        |         |
| skv1                          | 1.000    |         |         |         | 1.408  | 0.828   |
| skv2                          | 1.166    | 0.019   | 62.387  | 0.000   | 1.641  | 0.908   |
| skv3                          | 1.198    | 0.019   | 63.200  | 0.000   | 1.687  | 0.938   |
| SKD =~                        |          |         |         |         |        |         |
| skd1                          | 1.000    |         |         |         | 1.126  | 0.723   |
| skd2                          | 1.093    | 0.042   | 25.939  | 0.000   | 1.231  | 0.776   |
| FCV =~                        |          |         |         |         |        |         |
| fcv1                          | 1.000    |         |         |         | 1.535  | 0.828   |
| fcv2                          | 1.020    | 0.025   | 40.844  | 0.000   | 1.566  | 0.854   |
| fcv3                          | 0.873    | 0.019   | 45.366  | 0.000   | 1.340  | 0.716   |
| TPO =~                        |          |         |         |         |        |         |
| tpo1                          | 1.000    |         |         |         | 1.815  | 0.964   |
| tpo2                          | 0.975    | 0.005   | 211.036 | 0.000   | 1.769  | 0.965   |
| tpo3                          | 0.919    | 0.008   | 109.235 | 0.000   | 1.668  | 0.887   |
| tpo4                          | 0.784    | 0.011   | 71.906  | 0.000   | 1.422  | 0.802   |
| tpo5                          | 0.841    | 0.007   | 120.067 | 0.000   | 1.526  | 0.902   |
| tpo6                          | 0.808    | 0.010   | 83.576  | 0.000   | 1.466  | 0.836   |
| TSC =~                        |          |         |         |         |        |         |
| tsc1                          | 1.000    |         |         |         | 1.305  | 0.814   |
| tsc2                          | 1.197    | 0.021   | 57.437  | 0.000   | 1.562  | 0.880   |
| tsc3                          | 1.367    | 0.027   | 50.015  | 0.000   | 1.784  | 0.883   |
| tsc4                          | 1.051    | 0.020   | 52.767  | 0.000   | 1.372  | 0.779   |
| Covariances:                  |          |         |         |         |        |         |
|                               | Estimate | Std.Err | z-value | P(> z ) | Std.lv | Std.all |
| CCB ~~                        |          |         |         |         |        |         |
| GCM                           | 0.772    | 0.034   | 22.596  | 0.000   | 0.570  | 0.570   |
| SKV                           | 1.012    | 0.048   | 21.288  | 0.000   | 0.584  | 0.584   |
| SKD                           | 0.616    | 0.041   | 15.138  | 0.000   | 0.445  | 0.445   |
| FCV                           | -0.571   | 0.048   | -11.766 | 0.000   | -0.302 | -0.302  |
| TPO                           | -0.839   | 0.052   | -16.177 | 0.000   | -0.376 | -0.376  |
| TSC                           | -0.885   | 0.047   | -18.764 | 0.000   | -0.551 | -0.551  |
| GCM ~~                        |          |         |         |         |        |         |
| SKV                           | 1.142    | 0.040   | 28.477  | 0.000   | 0.736  | 0.736   |
| SKD                           | 0.611    | 0.033   | 18.593  | 0.000   | 0.493  | 0.493   |
| FCV                           | -0.378   | 0.036   | -10.588 | 0.000   | -0.224 | -0.224  |
| TPO                           | -1.133   | 0.045   | -25.064 | 0.000   | -0.566 | -0.566  |
| TSC                           | -0.792   | 0.034   | -23.500 | 0.000   | -0.551 | -0.551  |
| SKV ~~                        |          |         |         |         |        |         |
| SKD                           | 0.861    | 0.043   | 19.976  | 0.000   | 0.543  | 0.543   |
| FCV                           | -0.628   | 0.047   | -13.348 | 0.000   | -0.291 | -0.291  |
| TPO                           | -1.412   | 0.050   | -28.476 | 0.000   | -0.552 | -0.552  |
| TSC                           | -1.220   | 0.046   | -26.345 | 0.000   | -0.664 | -0.664  |
| SKD ~~                        |          |         |         |         |        |         |
| FCV                           | -0.638   | 0.047   | -13.500 | 0.000   | -0.369 | -0.369  |
| TPO                           | -0.717   | 0.046   | -15.712 | 0.000   | -0.351 | -0.351  |
| TSC                           | -0.691   | 0.039   | -17.534 | 0.000   | -0.470 | -0.470  |
| FCV ~~                        |          |         |         |         |        |         |
| TPO                           | 1.030    | 0.053   | 19.408  | 0.000   | 0.370  | 0.370   |
| TSC                           | 0.937    | 0.046   | 20.547  | 0.000   | 0.468  | 0.468   |
| TPO ~~                        |          |         |         |         |        |         |
| TSC                           | 1.735    | 0.048   | 35.816  | 0.000   | 0.732  | 0.732   |
| Intercepts:                   |          |         |         |         |        |         |
|                               | Estimate | Std.Err | z-value | P(> z ) | Std.lv | Std.all |

|       |       |       |         |       |       |       |
|-------|-------|-------|---------|-------|-------|-------|
| .ccb1 | 1.992 | 0.027 | 72.919  | 0.000 | 1.992 | 1.242 |
| .ccb2 | 2.256 | 0.029 | 76.710  | 0.000 | 2.256 | 1.327 |
| .ccb3 | 1.813 | 0.023 | 77.457  | 0.000 | 1.813 | 1.362 |
| .ccb4 | 1.476 | 0.020 | 72.843  | 0.000 | 1.476 | 1.327 |
| .ccb5 | 1.666 | 0.024 | 69.075  | 0.000 | 1.666 | 1.216 |
| .ccb6 | 2.077 | 0.028 | 72.987  | 0.000 | 2.077 | 1.259 |
| .ccb7 | 2.040 | 0.029 | 69.942  | 0.000 | 2.040 | 1.205 |
| .ccb8 | 1.763 | 0.025 | 69.618  | 0.000 | 1.763 | 1.228 |
| .gcm1 | 5.396 | 0.026 | 206.307 | 0.000 | 5.396 | 3.491 |
| .gcm2 | 5.158 | 0.026 | 198.703 | 0.000 | 5.158 | 3.364 |
| .gcm3 | 3.969 | 0.030 | 133.877 | 0.000 | 3.969 | 2.270 |
| .gcm4 | 3.858 | 0.030 | 129.748 | 0.000 | 3.858 | 2.213 |
| .gcm5 | 4.154 | 0.031 | 133.011 | 0.000 | 4.154 | 2.270 |
| .skv1 | 3.277 | 0.030 | 110.784 | 0.000 | 3.277 | 1.928 |
| .skv2 | 3.936 | 0.031 | 127.679 | 0.000 | 3.936 | 2.178 |
| .skv3 | 3.612 | 0.031 | 117.669 | 0.000 | 3.612 | 2.009 |
| .skd1 | 3.619 | 0.026 | 137.113 | 0.000 | 3.619 | 2.324 |
| .skd2 | 4.212 | 0.027 | 156.543 | 0.000 | 4.212 | 2.655 |
| .fcv1 | 4.491 | 0.031 | 143.195 | 0.000 | 4.491 | 2.421 |
| .fcv2 | 5.135 | 0.031 | 165.596 | 0.000 | 5.135 | 2.800 |
| .fcv3 | 3.538 | 0.032 | 111.843 | 0.000 | 3.538 | 1.890 |
| .tpo1 | 3.371 | 0.032 | 105.870 | 0.000 | 3.371 | 1.790 |
| .tpo2 | 3.364 | 0.031 | 108.515 | 0.000 | 3.364 | 1.835 |
| .tpo3 | 3.534 | 0.032 | 111.124 | 0.000 | 3.534 | 1.880 |
| .tpo4 | 3.743 | 0.030 | 124.582 | 0.000 | 3.743 | 2.110 |
| .tpo5 | 2.891 | 0.029 | 101.061 | 0.000 | 2.891 | 1.710 |
| .tpo6 | 3.075 | 0.030 | 103.588 | 0.000 | 3.075 | 1.754 |
| .tsc1 | 5.145 | 0.027 | 189.745 | 0.000 | 5.145 | 3.209 |
| .tsc2 | 4.897 | 0.030 | 163.160 | 0.000 | 4.897 | 2.759 |
| .tsc3 | 4.504 | 0.034 | 131.866 | 0.000 | 4.504 | 2.229 |
| .tsc4 | 4.481 | 0.030 | 150.046 | 0.000 | 4.481 | 2.546 |
| CCB   | 0.000 |       |         |       | 0.000 | 0.000 |
| GCM   | 0.000 |       |         |       | 0.000 | 0.000 |
| SKV   | 0.000 |       |         |       | 0.000 | 0.000 |
| SKD   | 0.000 |       |         |       | 0.000 | 0.000 |
| FCV   | 0.000 |       |         |       | 0.000 | 0.000 |
| TPO   | 0.000 |       |         |       | 0.000 | 0.000 |
| TSC   | 0.000 |       |         |       | 0.000 | 0.000 |

Variiances:

|       | Estimate | Std.Err | z-value | P(> z ) | Std.lv | Std.all |
|-------|----------|---------|---------|---------|--------|---------|
| .ccb1 | 1.059    | 0.054   | 19.498  | 0.000   | 1.059  | 0.412   |
| .ccb2 | 1.448    | 0.065   | 22.397  | 0.000   | 1.448  | 0.501   |
| .ccb3 | 0.576    | 0.035   | 16.435  | 0.000   | 0.576  | 0.325   |
| .ccb4 | 0.540    | 0.029   | 18.690  | 0.000   | 0.540  | 0.437   |
| .ccb5 | 0.516    | 0.032   | 15.936  | 0.000   | 0.516  | 0.275   |
| .ccb6 | 0.748    | 0.041   | 18.287  | 0.000   | 0.748  | 0.275   |
| .ccb7 | 0.934    | 0.054   | 17.184  | 0.000   | 0.934  | 0.326   |
| .ccb8 | 0.514    | 0.033   | 15.708  | 0.000   | 0.514  | 0.249   |
| .gcm1 | 1.176    | 0.038   | 30.693  | 0.000   | 1.176  | 0.492   |
| .gcm2 | 1.054    | 0.038   | 27.679  | 0.000   | 1.054  | 0.449   |
| .gcm3 | 0.990    | 0.038   | 26.061  | 0.000   | 0.990  | 0.324   |
| .gcm4 | 0.694    | 0.034   | 20.549  | 0.000   | 0.694  | 0.228   |
| .gcm5 | 1.191    | 0.048   | 24.898  | 0.000   | 1.191  | 0.356   |
| .skv1 | 0.907    | 0.041   | 21.990  | 0.000   | 0.907  | 0.314   |
| .skv2 | 0.572    | 0.029   | 19.931  | 0.000   | 0.572  | 0.175   |
| .skv3 | 0.387    | 0.027   | 14.303  | 0.000   | 0.387  | 0.120   |
| .skd1 | 1.158    | 0.057   | 20.351  | 0.000   | 1.158  | 0.478   |
| .skd2 | 1.002    | 0.061   | 16.439  | 0.000   | 1.002  | 0.398   |
| .fcv1 | 1.084    | 0.075   | 14.395  | 0.000   | 1.084  | 0.315   |
| .fcv2 | 0.910    | 0.051   | 17.994  | 0.000   | 0.910  | 0.271   |
| .fcv3 | 1.706    | 0.053   | 32.380  | 0.000   | 1.706  | 0.487   |
| .tpo1 | 0.251    | 0.017   | 15.043  | 0.000   | 0.251  | 0.071   |
| .tpo2 | 0.230    | 0.016   | 14.669  | 0.000   | 0.230  | 0.069   |
| .tpo3 | 0.754    | 0.036   | 20.799  | 0.000   | 0.754  | 0.213   |
| .tpo4 | 1.124    | 0.039   | 28.640  | 0.000   | 1.124  | 0.357   |
| .tpo5 | 0.531    | 0.020   | 26.656  | 0.000   | 0.531  | 0.186   |
| .tpo6 | 0.925    | 0.039   | 23.867  | 0.000   | 0.925  | 0.301   |
| .tsc1 | 0.868    | 0.036   | 24.407  | 0.000   | 0.868  | 0.338   |
| .tsc2 | 0.710    | 0.034   | 21.181  | 0.000   | 0.710  | 0.225   |
| .tsc3 | 0.901    | 0.044   | 20.338  | 0.000   | 0.901  | 0.221   |
| .tsc4 | 1.216    | 0.047   | 25.809  | 0.000   | 1.216  | 0.393   |
| CCB   | 1.512    | 0.078   | 19.486  | 0.000   | 1.000  | 1.000   |
| GCM   | 1.214    | 0.053   | 22.769  | 0.000   | 1.000  | 1.000   |
| SKV   | 1.983    | 0.067   | 29.489  | 0.000   | 1.000  | 1.000   |

```

SKD      1.267    0.069    18.301    0.000    1.000    1.000
FCV      2.356    0.091    25.964    0.000    1.000    1.000
TPO      3.295    0.053    61.765    0.000    1.000    1.000
TSC      1.703    0.068    25.173    0.000    1.000    1.000

> reliability(fcfa2,return.total=TRUE)
      CCB      GCM      SKV      SKD      FCV      TPO      TSC      total
alpha 0.9315852 0.8941570 0.9197330 0.7185974 0.8413552 0.9601136 0.9033503 0.6963075
omega 0.9352467 0.8973172 0.9231695 0.7198406 0.8420976 0.9607750 0.9075272 0.9030232
omega2 0.9352467 0.8973172 0.9231695 0.7198406 0.8420976 0.9607750 0.9075272 0.9030232
omega3 0.9431022 0.8953625 0.9251837 0.7196196 0.8407858 0.9573677 0.9069426 0.9087809
avevar 0.6480421 0.6401758 0.8011592 0.5627936 0.6410348 0.8045864 0.7135561 0.7010890
>
> cfa3 <- '
+ INT=~1*int1
+ int1~~0*int1
+ ATT=~att1+att3
+ SN =~sn2 + sn4
+ PBC=~pbc2+pbc3
+ CCB=~ccb1+ccb2+ccb3+ccb4+ccb5+ccb6+ccb7+ccb8
+ GCM=~gcm1+gcm2+gcm3+gcm4+gcm5
+ SKV=~skv1+skv2+skv3
+ SKD=~skd1+skd2
+ FCV=~fcv1+fcv2+fcv3
+ TPO=~tpo1+tpo2+tpo3+tpo4+tpo5+tpo6
+ TSC=~tsc1+tsc2+tsc3+tsc4'
> fcfa3 <- cfa(cfa3,data=tpb_data,missing="FIML",estimator="MLR")
Warnmeldung:
In lav_data_full(data = data, group = group, cluster = cluster, :
lavaan WARNING: some cases are empty and will be ignored:
173 2366 2375 2400 2650 2651 2657 2702 2710 2813 2833 3153 3511
> summary(fcfa3,fit.measures=TRUE,standardized=TRUE)
lavaan 0.6-9 ended normally after 157 iterations

Estimator              ML
Optimization method    NLMINB
Number of model parameters 168

Number of observations  Used      Total
Number of missing patterns 463

Model Test User Model:

Test Statistic          Standard      Robust
Degrees of freedom          611          611
P-value (Chi-square)      0.000        0.000
Scaling correction factor          1.228
Yuan-Bentler correction (Mplus variant)

Model Test Baseline Model:

Test statistic          110469.375    84960.613
Degrees of freedom          703          703
P-value          0.000        0.000
Scaling correction factor          1.300

User Model versus Baseline Model:

Comparative Fit Index (CFI)          0.943        0.941
Tucker-Lewis Index (TLI)          0.935        0.932

Robust Comparative Fit Index (CFI)          0.944
Robust Tucker-Lewis Index (TLI)          0.936

Loglikelihood and Information Criteria:

Loglikelihood user model (H0)          -204879.423 -204879.423
Scaling correction factor          1.445
for the MLR correction
Loglikelihood unrestricted model (H1)          -201451.440 -201451.440
Scaling correction factor          1.275
for the MLR correction

Akaike (AIC)          410094.845    410094.845

```

|                                     |            |            |
|-------------------------------------|------------|------------|
| Bayesian (BIC)                      | 411130.722 | 411130.722 |
| Sample-size adjusted Bayesian (BIC) | 410596.904 | 410596.904 |

Root Mean Square Error of Approximation:

|                                        |       |       |
|----------------------------------------|-------|-------|
| RMSEA                                  | 0.054 | 0.048 |
| 90 Percent confidence interval - lower | 0.053 | 0.047 |
| 90 Percent confidence interval - upper | 0.055 | 0.049 |
| P-value RMSEA <= 0.05                  | 0.000 | 0.999 |
| Robust RMSEA                           |       | 0.053 |
| 90 Percent confidence interval - lower |       | 0.052 |
| 90 Percent confidence interval - upper |       | 0.055 |

Standardized Root Mean Square Residual:

|      |       |       |
|------|-------|-------|
| SRMR | 0.047 | 0.047 |
|------|-------|-------|

Parameter Estimates:

|                               |          |
|-------------------------------|----------|
| Standard errors               | Sandwich |
| Information bread             | Observed |
| Observed information based on | Hessian  |

Latent Variables:

|        | Estimate | Std.Err | z-value | P(> z ) | Std.lv | Std.all |
|--------|----------|---------|---------|---------|--------|---------|
| INT =~ |          |         |         |         |        |         |
| int1   | 1.000    |         |         |         | 2.456  | 1.000   |
| ATT =~ |          |         |         |         |        |         |
| att1   | 1.000    |         |         |         | 1.957  | 0.942   |
| att3   | 1.051    | 0.010   | 110.478 | 0.000   | 2.056  | 0.941   |
| SN =~  |          |         |         |         |        |         |
| sn2    | 1.000    |         |         |         | 1.736  | 0.813   |
| sn4    | 0.917    | 0.020   | 46.839  | 0.000   | 1.592  | 0.853   |
| PBC =~ |          |         |         |         |        |         |
| pbc2   | 1.000    |         |         |         | 1.432  | 0.694   |
| pbc3   | 1.279    | 0.040   | 32.134  | 0.000   | 1.832  | 0.891   |
| CCB =~ |          |         |         |         |        |         |
| ccb1   | 1.000    |         |         |         | 1.232  | 0.768   |
| ccb2   | 0.974    | 0.027   | 35.953  | 0.000   | 1.200  | 0.706   |
| ccb3   | 0.887    | 0.027   | 33.344  | 0.000   | 1.093  | 0.821   |
| ccb4   | 0.676    | 0.031   | 21.899  | 0.000   | 0.833  | 0.749   |
| ccb5   | 0.948    | 0.028   | 33.514  | 0.000   | 1.167  | 0.852   |
| ccb6   | 1.141    | 0.027   | 41.788  | 0.000   | 1.406  | 0.852   |
| ccb7   | 1.129    | 0.028   | 39.860  | 0.000   | 1.391  | 0.822   |
| ccb8   | 1.011    | 0.026   | 39.181  | 0.000   | 1.245  | 0.867   |
| GCM =~ |          |         |         |         |        |         |
| gcm1   | 1.000    |         |         |         | 1.102  | 0.713   |
| gcm2   | 1.034    | 0.018   | 57.546  | 0.000   | 1.139  | 0.743   |
| gcm3   | 1.305    | 0.031   | 41.857  | 0.000   | 1.438  | 0.822   |
| gcm4   | 1.390    | 0.034   | 41.326  | 0.000   | 1.531  | 0.878   |
| gcm5   | 1.333    | 0.031   | 42.468  | 0.000   | 1.469  | 0.803   |
| SKV =~ |          |         |         |         |        |         |
| skv1   | 1.000    |         |         |         | 1.405  | 0.827   |
| skv2   | 1.167    | 0.019   | 62.379  | 0.000   | 1.641  | 0.908   |
| skv3   | 1.201    | 0.019   | 63.104  | 0.000   | 1.688  | 0.939   |
| SKD =~ |          |         |         |         |        |         |
| skd1   | 1.000    |         |         |         | 1.124  | 0.722   |
| skd2   | 1.096    | 0.042   | 26.101  | 0.000   | 1.232  | 0.777   |
| FCV =~ |          |         |         |         |        |         |
| fcv1   | 1.000    |         |         |         | 1.520  | 0.819   |
| fcv2   | 1.041    | 0.025   | 42.192  | 0.000   | 1.582  | 0.863   |
| fcv3   | 0.879    | 0.019   | 46.558  | 0.000   | 1.336  | 0.714   |
| TPO =~ |          |         |         |         |        |         |
| tpo1   | 1.000    |         |         |         | 1.815  | 0.964   |
| tpo2   | 0.975    | 0.005   | 211.036 | 0.000   | 1.769  | 0.965   |
| tpo3   | 0.919    | 0.008   | 109.309 | 0.000   | 1.668  | 0.887   |
| tpo4   | 0.784    | 0.011   | 71.921  | 0.000   | 1.423  | 0.802   |
| tpo5   | 0.841    | 0.007   | 120.076 | 0.000   | 1.526  | 0.902   |
| tpo6   | 0.808    | 0.010   | 83.547  | 0.000   | 1.466  | 0.836   |
| TSC =~ |          |         |         |         |        |         |
| tsc1   | 1.000    |         |         |         | 1.309  | 0.817   |
| tsc2   | 1.189    | 0.020   | 58.047  | 0.000   | 1.557  | 0.877   |
| tsc3   | 1.364    | 0.027   | 50.863  | 0.000   | 1.786  | 0.884   |
| tsc4   | 1.048    | 0.020   | 53.306  | 0.000   | 1.372  | 0.779   |

## Covariances:

|        | Estimate | Std.Err | z-value | P(> z ) | Std.lv | Std.all |
|--------|----------|---------|---------|---------|--------|---------|
| INT ~~ |          |         |         |         |        |         |
| ATT    | 3.325    | 0.089   | 37.246  | 0.000   | 0.692  | 0.692   |
| SN     | 2.384    | 0.084   | 28.442  | 0.000   | 0.559  | 0.559   |
| PBC    | 1.897    | 0.080   | 23.692  | 0.000   | 0.539  | 0.539   |
| CCB    | -1.110   | 0.065   | -17.187 | 0.000   | -0.367 | -0.367  |
| GCM    | -0.807   | 0.051   | -15.737 | 0.000   | -0.298 | -0.298  |
| SKV    | -1.427   | 0.064   | -22.233 | 0.000   | -0.413 | -0.413  |
| SKD    | -0.832   | 0.061   | -13.685 | 0.000   | -0.301 | -0.301  |
| FCV    | 1.377    | 0.073   | 18.939  | 0.000   | 0.369  | 0.369   |
| TPO    | 1.617    | 0.075   | 21.526  | 0.000   | 0.363  | 0.363   |
| TSC    | 1.527    | 0.064   | 23.802  | 0.000   | 0.475  | 0.475   |
| ATT ~~ |          |         |         |         |        |         |
| SN     | 2.880    | 0.076   | 37.735  | 0.000   | 0.848  | 0.848   |
| PBC    | 2.235    | 0.083   | 26.973  | 0.000   | 0.797  | 0.797   |
| CCB    | -1.339   | 0.065   | -20.569 | 0.000   | -0.556 | -0.556  |
| GCM    | -1.025   | 0.045   | -22.632 | 0.000   | -0.475 | -0.475  |
| SKV    | -1.683   | 0.059   | -28.686 | 0.000   | -0.612 | -0.612  |
| SKD    | -1.037   | 0.054   | -19.123 | 0.000   | -0.471 | -0.471  |
| FCV    | 1.580    | 0.066   | 24.080  | 0.000   | 0.531  | 0.531   |
| TPO    | 1.891    | 0.063   | 30.088  | 0.000   | 0.533  | 0.533   |
| TSC    | 1.807    | 0.062   | 28.990  | 0.000   | 0.705  | 0.705   |
| SN ~~  |          |         |         |         |        |         |
| PBC    | 1.721    | 0.073   | 23.477  | 0.000   | 0.692  | 0.692   |
| CCB    | -1.062   | 0.057   | -18.747 | 0.000   | -0.497 | -0.497  |
| GCM    | -0.833   | 0.043   | -19.481 | 0.000   | -0.435 | -0.435  |
| SKV    | -1.327   | 0.053   | -25.078 | 0.000   | -0.544 | -0.544  |
| SKD    | -0.811   | 0.050   | -16.127 | 0.000   | -0.416 | -0.416  |
| FCV    | 1.419    | 0.061   | 23.110  | 0.000   | 0.538  | 0.538   |
| TPO    | 1.567    | 0.062   | 25.428  | 0.000   | 0.497  | 0.497   |
| TSC    | 1.414    | 0.054   | 25.990  | 0.000   | 0.622  | 0.622   |
| PBC ~~ |          |         |         |         |        |         |
| CCB    | -0.818   | 0.051   | -16.028 | 0.000   | -0.464 | -0.464  |
| GCM    | -0.551   | 0.035   | -15.740 | 0.000   | -0.349 | -0.349  |
| SKV    | -0.977   | 0.050   | -19.639 | 0.000   | -0.485 | -0.485  |
| SKD    | -0.552   | 0.043   | -12.970 | 0.000   | -0.343 | -0.343  |
| FCV    | 0.718    | 0.052   | 13.721  | 0.000   | 0.330  | 0.330   |
| TPO    | 1.040    | 0.054   | 19.262  | 0.000   | 0.400  | 0.400   |
| TSC    | 1.044    | 0.053   | 19.870  | 0.000   | 0.557  | 0.557   |
| CCB ~~ |          |         |         |         |        |         |
| GCM    | 0.775    | 0.034   | 22.650  | 0.000   | 0.571  | 0.571   |
| SKV    | 1.011    | 0.047   | 21.307  | 0.000   | 0.584  | 0.584   |
| SKD    | 0.616    | 0.041   | 15.171  | 0.000   | 0.445  | 0.445   |
| FCV    | -0.572   | 0.048   | -11.879 | 0.000   | -0.306 | -0.306  |
| TPO    | -0.843   | 0.052   | -16.232 | 0.000   | -0.377 | -0.377  |
| TSC    | -0.890   | 0.047   | -18.842 | 0.000   | -0.552 | -0.552  |
| GCM ~~ |          |         |         |         |        |         |
| SKV    | 1.139    | 0.040   | 28.398  | 0.000   | 0.735  | 0.735   |
| SKD    | 0.610    | 0.033   | 18.575  | 0.000   | 0.493  | 0.493   |
| FCV    | -0.376   | 0.035   | -10.635 | 0.000   | -0.224 | -0.224  |
| TPO    | -1.133   | 0.045   | -25.099 | 0.000   | -0.567 | -0.567  |
| TSC    | -0.795   | 0.034   | -23.588 | 0.000   | -0.551 | -0.551  |
| SKV ~~ |          |         |         |         |        |         |
| SKD    | 0.859    | 0.043   | 19.994  | 0.000   | 0.544  | 0.544   |
| FCV    | -0.623   | 0.046   | -13.416 | 0.000   | -0.292 | -0.292  |
| TPO    | -1.410   | 0.049   | -28.489 | 0.000   | -0.553 | -0.553  |
| TSC    | -1.221   | 0.046   | -26.436 | 0.000   | -0.664 | -0.664  |
| SKD ~~ |          |         |         |         |        |         |
| FCV    | -0.632   | 0.047   | -13.504 | 0.000   | -0.370 | -0.370  |
| TPO    | -0.717   | 0.046   | -15.715 | 0.000   | -0.351 | -0.351  |
| TSC    | -0.693   | 0.039   | -17.546 | 0.000   | -0.471 | -0.471  |
| FCV ~~ |          |         |         |         |        |         |
| TPO    | 1.023    | 0.053   | 19.442  | 0.000   | 0.371  | 0.371   |
| TSC    | 0.937    | 0.045   | 20.658  | 0.000   | 0.471  | 0.471   |
| TPO ~~ |          |         |         |         |        |         |
| TSC    | 1.742    | 0.048   | 36.062  | 0.000   | 0.733  | 0.733   |

## Intercepts:

|       | Estimate | Std.Err | z-value | P(> z ) | Std.lv | Std.all |
|-------|----------|---------|---------|---------|--------|---------|
| .int1 | 4.749    | 0.041   | 114.463 | 0.000   | 4.749  | 1.933   |
| .att1 | 5.241    | 0.035   | 148.322 | 0.000   | 5.241  | 2.524   |
| .att3 | 4.969    | 0.037   | 134.195 | 0.000   | 4.969  | 2.275   |
| .sn2  | 4.430    | 0.036   | 121.430 | 0.000   | 4.430  | 2.075   |

|       |       |       |         |       |       |       |
|-------|-------|-------|---------|-------|-------|-------|
| .sn4  | 5.100 | 0.032 | 159.205 | 0.000 | 5.100 | 2.733 |
| .pbc2 | 5.190 | 0.035 | 146.370 | 0.000 | 5.190 | 2.515 |
| .pbc3 | 5.278 | 0.035 | 149.935 | 0.000 | 5.278 | 2.565 |
| .ccb1 | 1.993 | 0.027 | 72.938  | 0.000 | 1.993 | 1.243 |
| .ccb2 | 2.257 | 0.029 | 76.705  | 0.000 | 2.257 | 1.327 |
| .ccb3 | 1.815 | 0.023 | 77.437  | 0.000 | 1.815 | 1.363 |
| .ccb4 | 1.477 | 0.020 | 72.773  | 0.000 | 1.477 | 1.328 |
| .ccb5 | 1.668 | 0.024 | 69.058  | 0.000 | 1.668 | 1.217 |
| .ccb6 | 2.079 | 0.028 | 73.025  | 0.000 | 2.079 | 1.259 |
| .ccb7 | 2.042 | 0.029 | 69.966  | 0.000 | 2.042 | 1.206 |
| .ccb8 | 1.765 | 0.025 | 69.622  | 0.000 | 1.765 | 1.229 |
| .gcm1 | 5.397 | 0.026 | 206.373 | 0.000 | 5.397 | 3.491 |
| .gcm2 | 5.159 | 0.026 | 198.755 | 0.000 | 5.159 | 3.365 |
| .gcm3 | 3.969 | 0.030 | 133.906 | 0.000 | 3.969 | 2.270 |
| .gcm4 | 3.858 | 0.030 | 129.773 | 0.000 | 3.858 | 2.213 |
| .gcm5 | 4.154 | 0.031 | 133.035 | 0.000 | 4.154 | 2.271 |
| .skv1 | 3.279 | 0.030 | 110.841 | 0.000 | 3.279 | 1.928 |
| .skv2 | 3.937 | 0.031 | 127.847 | 0.000 | 3.937 | 2.179 |
| .skv3 | 3.614 | 0.031 | 117.826 | 0.000 | 3.614 | 2.010 |
| .skd1 | 3.620 | 0.026 | 137.141 | 0.000 | 3.620 | 2.325 |
| .skd2 | 4.212 | 0.027 | 156.600 | 0.000 | 4.212 | 2.655 |
| .fcv1 | 4.490 | 0.031 | 143.146 | 0.000 | 4.490 | 2.420 |
| .fcv2 | 5.134 | 0.031 | 165.537 | 0.000 | 5.134 | 2.799 |
| .fcv3 | 3.537 | 0.032 | 111.817 | 0.000 | 3.537 | 1.890 |
| .tpo1 | 3.369 | 0.032 | 105.872 | 0.000 | 3.369 | 1.789 |
| .tpo2 | 3.362 | 0.031 | 108.518 | 0.000 | 3.362 | 1.834 |
| .tpo3 | 3.533 | 0.032 | 111.124 | 0.000 | 3.533 | 1.879 |
| .tpo4 | 3.742 | 0.030 | 124.574 | 0.000 | 3.742 | 2.109 |
| .tpo5 | 2.890 | 0.029 | 101.072 | 0.000 | 2.890 | 1.709 |
| .tpo6 | 3.074 | 0.030 | 103.586 | 0.000 | 3.074 | 1.753 |
| .tsc1 | 5.144 | 0.027 | 189.670 | 0.000 | 5.144 | 3.208 |
| .tsc2 | 4.896 | 0.030 | 163.092 | 0.000 | 4.896 | 2.758 |
| .tsc3 | 4.501 | 0.034 | 131.821 | 0.000 | 4.501 | 2.227 |
| .tsc4 | 4.479 | 0.030 | 150.010 | 0.000 | 4.479 | 2.545 |
| INT   | 0.000 |       |         |       | 0.000 | 0.000 |
| ATT   | 0.000 |       |         |       | 0.000 | 0.000 |
| SN    | 0.000 |       |         |       | 0.000 | 0.000 |
| PBC   | 0.000 |       |         |       | 0.000 | 0.000 |
| CCB   | 0.000 |       |         |       | 0.000 | 0.000 |
| GCM   | 0.000 |       |         |       | 0.000 | 0.000 |
| SKV   | 0.000 |       |         |       | 0.000 | 0.000 |
| SKD   | 0.000 |       |         |       | 0.000 | 0.000 |
| FCV   | 0.000 |       |         |       | 0.000 | 0.000 |
| TPO   | 0.000 |       |         |       | 0.000 | 0.000 |
| TSC   | 0.000 |       |         |       | 0.000 | 0.000 |

Variances:

|       | Estimate | Std.Err | z-value | P(> z ) | Std.lv | Std.all |
|-------|----------|---------|---------|---------|--------|---------|
| .int1 | 0.000    |         |         |         | 0.000  | 0.000   |
| .att1 | 0.484    | 0.033   | 14.728  | 0.000   | 0.484  | 0.112   |
| .att3 | 0.545    | 0.038   | 14.192  | 0.000   | 0.545  | 0.114   |
| .sn2  | 1.543    | 0.077   | 19.987  | 0.000   | 1.543  | 0.339   |
| .sn4  | 0.949    | 0.062   | 15.232  | 0.000   | 0.949  | 0.272   |
| .pbc2 | 2.206    | 0.097   | 22.815  | 0.000   | 2.206  | 0.518   |
| .pbc3 | 0.876    | 0.091   | 9.638   | 0.000   | 0.876  | 0.207   |
| .ccb1 | 1.055    | 0.054   | 19.471  | 0.000   | 1.055  | 0.410   |
| .ccb2 | 1.453    | 0.065   | 22.448  | 0.000   | 1.453  | 0.502   |
| .ccb3 | 0.579    | 0.035   | 16.475  | 0.000   | 0.579  | 0.326   |
| .ccb4 | 0.542    | 0.029   | 18.699  | 0.000   | 0.542  | 0.439   |
| .ccb5 | 0.515    | 0.032   | 15.997  | 0.000   | 0.515  | 0.274   |
| .ccb6 | 0.747    | 0.041   | 18.314  | 0.000   | 0.747  | 0.274   |
| .ccb7 | 0.932    | 0.054   | 17.166  | 0.000   | 0.932  | 0.325   |
| .ccb8 | 0.512    | 0.033   | 15.746  | 0.000   | 0.512  | 0.248   |
| .gcm1 | 1.176    | 0.038   | 30.701  | 0.000   | 1.176  | 0.492   |
| .gcm2 | 1.054    | 0.038   | 27.623  | 0.000   | 1.054  | 0.448   |
| .gcm3 | 0.990    | 0.038   | 26.083  | 0.000   | 0.990  | 0.324   |
| .gcm4 | 0.695    | 0.034   | 20.524  | 0.000   | 0.695  | 0.229   |
| .gcm5 | 1.190    | 0.048   | 24.903  | 0.000   | 1.190  | 0.356   |
| .skv1 | 0.916    | 0.041   | 22.122  | 0.000   | 0.916  | 0.317   |
| .skv2 | 0.572    | 0.029   | 19.883  | 0.000   | 0.572  | 0.175   |
| .skv3 | 0.381    | 0.027   | 14.295  | 0.000   | 0.381  | 0.118   |
| .skd1 | 1.161    | 0.056   | 20.606  | 0.000   | 1.161  | 0.479   |
| .skd2 | 0.999    | 0.061   | 16.423  | 0.000   | 0.999  | 0.397   |
| .fcv1 | 1.130    | 0.074   | 15.288  | 0.000   | 1.130  | 0.328   |
| .fcv2 | 0.861    | 0.049   | 17.725  | 0.000   | 0.861  | 0.256   |



|       |       |       |        |       |       |       |
|-------|-------|-------|--------|-------|-------|-------|
| .fcv3 | 1.718 | 0.052 | 32.751 | 0.000 | 1.718 | 0.490 |
| .tpo1 | 0.251 | 0.017 | 15.039 | 0.000 | 0.251 | 0.071 |
| .tpo2 | 0.230 | 0.016 | 14.677 | 0.000 | 0.230 | 0.068 |
| .tpo3 | 0.754 | 0.036 | 20.818 | 0.000 | 0.754 | 0.213 |
| .tpo4 | 1.124 | 0.039 | 28.652 | 0.000 | 1.124 | 0.357 |
| .tpo5 | 0.531 | 0.020 | 26.650 | 0.000 | 0.531 | 0.186 |
| .tpo6 | 0.926 | 0.039 | 23.863 | 0.000 | 0.926 | 0.301 |
| .tsc1 | 0.857 | 0.035 | 24.614 | 0.000 | 0.857 | 0.333 |
| .tsc2 | 0.729 | 0.034 | 21.549 | 0.000 | 0.729 | 0.231 |
| .tsc3 | 0.895 | 0.043 | 20.697 | 0.000 | 0.895 | 0.219 |
| .tsc4 | 1.216 | 0.047 | 26.044 | 0.000 | 1.216 | 0.392 |
| INT   | 6.032 | 0.074 | 81.046 | 0.000 | 1.000 | 1.000 |
| ATT   | 3.828 | 0.093 | 41.313 | 0.000 | 1.000 | 1.000 |
| SN    | 3.014 | 0.094 | 32.134 | 0.000 | 1.000 | 1.000 |
| PBC   | 2.052 | 0.108 | 19.020 | 0.000 | 1.000 | 1.000 |
| CCB   | 1.517 | 0.078 | 19.544 | 0.000 | 1.000 | 1.000 |
| GCM   | 1.214 | 0.053 | 22.773 | 0.000 | 1.000 | 1.000 |
| SKV   | 1.975 | 0.067 | 29.377 | 0.000 | 1.000 | 1.000 |
| SKD   | 1.264 | 0.069 | 18.360 | 0.000 | 1.000 | 1.000 |
| FCV   | 2.311 | 0.089 | 25.988 | 0.000 | 1.000 | 1.000 |
| TPO   | 3.295 | 0.053 | 61.760 | 0.000 | 1.000 | 1.000 |
| TSC   | 1.714 | 0.067 | 25.468 | 0.000 | 1.000 | 1.000 |

## A4. SEM "Model 1".

```

> ##### SEM for the TPB
> ml <- '
+ ATT=~att1+att3
+ SN =~sn2 + sn4
+ PBC=~pbc2+pbc3
+ # STRUCTURAL PART
+ int1 ~ ATT+SN+PBC'
> fl.1 <- sem(ml,data=tpb_data,missing="FIML",estimator="MLR")
Warnmeldung:
In lav_data_full(data = data, group = group, cluster = cluster, :
lavaan WARNING: some cases are empty and will be ignored:
173 262 470 1001 1141 1610 1811 2366 2375 2400 2650 2651 2657 2674 2688 2702 2710 2813 2833
2848 2865 3009 3153 3340 3511
> summary(fl.1,standardized=TRUE,fit.measures=TRUE,rsquare=TRUE)
lavaan 0.6-9 ended normally after 63 iterations

Estimator                      ML
Optimization method             NLMINB
Number of model parameters      26

                                Used      Total
Number of observations          3507     3532
Number of missing patterns      52

Model Test User Model:

                                Standard      Robust
Test Statistic                  32.268     27.274
Degrees of freedom               9          9
P-value (Chi-square)            0.000     0.001
Scaling correction factor        1.183
Yuan-Bentler correction (Mplus variant)

Model Test Baseline Model:

Test statistic                   15963.289   9323.875
Degrees of freedom               21         21
P-value                          0.000     0.000
Scaling correction factor        1.712

User Model versus Baseline Model:

Comparative Fit Index (CFI)     0.999     0.998
Tucker-Lewis Index (TLI)       0.997     0.995

Robust Comparative Fit Index (CFI) 0.999
Robust Tucker-Lewis Index (TLI)  0.997

Loglikelihood and Information Criteria:

Loglikelihood user model (H0)    -43723.806 -43723.806
Scaling correction factor        1.411
for the MLR correction
Loglikelihood unrestricted model (H1) -43707.672 -43707.672
Scaling correction factor        1.352
for the MLR correction

Akaike (AIC)                    87499.611  87499.611
Bayesian (BIC)                  87659.837  87659.837
Sample-size adjusted Bayesian (BIC) 87577.222  87577.222

Root Mean Square Error of Approximation:

RMSEA                           0.027     0.024
90 Percent confidence interval - lower 0.017     0.015
90 Percent confidence interval - upper 0.038     0.034
P-value RMSEA <= 0.05           1.000     1.000

Robust RMSEA                     0.026
90 Percent confidence interval - lower 0.015
90 Percent confidence interval - upper 0.038

Standardized Root Mean Square Residual:

```

SRMR 0.006 0.006

Parameter Estimates:

Standard errors Sandwich  
 Information bread Observed  
 Observed information based on Hessian

Latent Variables:

|        | Estimate | Std.Err | z-value | P(> z ) | Std.lv | Std.all |
|--------|----------|---------|---------|---------|--------|---------|
| ATT =~ |          |         |         |         |        |         |
| att1   | 1.000    |         |         |         | 1.949  | 0.940   |
| att3   | 1.057    | 0.010   | 103.535 | 0.000   | 2.060  | 0.944   |
| SN =~  |          |         |         |         |        |         |
| sn2    | 1.000    |         |         |         | 1.741  | 0.816   |
| sn4    | 0.911    | 0.020   | 46.338  | 0.000   | 1.586  | 0.850   |
| PBC =~ |          |         |         |         |        |         |
| pbc2   | 1.000    |         |         |         | 1.425  | 0.691   |
| pbc3   | 1.291    | 0.041   | 31.459  | 0.000   | 1.840  | 0.895   |

Regressions:

|        | Estimate | Std.Err | z-value | P(> z ) | Std.lv | Std.all |
|--------|----------|---------|---------|---------|--------|---------|
| int1 ~ |          |         |         |         |        |         |
| ATT    | 1.002    | 0.050   | 20.022  | 0.000   | 1.953  | 0.795   |
| SN     | -0.133   | 0.046   | -2.880  | 0.004   | -0.232 | -0.094  |
| PBC    | -0.053   | 0.043   | -1.212  | 0.226   | -0.075 | -0.031  |

Covariances:

|        | Estimate | Std.Err | z-value | P(> z ) | Std.lv | Std.all |
|--------|----------|---------|---------|---------|--------|---------|
| ATT ~~ |          |         |         |         |        |         |
| SN     | 2.880    | 0.077   | 37.581  | 0.000   | 0.849  | 0.849   |
| PBC    | 2.210    | 0.084   | 26.326  | 0.000   | 0.796  | 0.796   |
| SN ~~  |          |         |         |         |        |         |
| PBC    | 1.710    | 0.074   | 23.090  | 0.000   | 0.690  | 0.690   |

Intercepts:

|       | Estimate | Std.Err | z-value | P(> z ) | Std.lv | Std.all |
|-------|----------|---------|---------|---------|--------|---------|
| .att1 | 5.246    | 0.035   | 148.460 | 0.000   | 5.246  | 2.529   |
| .att3 | 4.975    | 0.037   | 134.254 | 0.000   | 4.975  | 2.278   |
| .sn2  | 4.436    | 0.036   | 121.570 | 0.000   | 4.436  | 2.078   |
| .sn4  | 5.104    | 0.032   | 159.395 | 0.000   | 5.104  | 2.736   |
| .pbc2 | 5.193    | 0.035   | 146.575 | 0.000   | 5.193  | 2.518   |
| .pbc3 | 5.282    | 0.035   | 150.184 | 0.000   | 5.282  | 2.569   |
| .int1 | 4.752    | 0.041   | 114.514 | 0.000   | 4.752  | 1.935   |
| ATT   | 0.000    |         |         |         | 0.000  | 0.000   |
| SN    | 0.000    |         |         |         | 0.000  | 0.000   |
| PBC   | 0.000    |         |         |         | 0.000  | 0.000   |

Variances:

|       | Estimate | Std.Err | z-value | P(> z ) | Std.lv | Std.all |
|-------|----------|---------|---------|---------|--------|---------|
| .att1 | 0.504    | 0.035   | 14.540  | 0.000   | 0.504  | 0.117   |
| .att3 | 0.522    | 0.040   | 13.216  | 0.000   | 0.522  | 0.110   |
| .sn2  | 1.526    | 0.078   | 19.455  | 0.000   | 1.526  | 0.335   |
| .sn4  | 0.965    | 0.063   | 15.405  | 0.000   | 0.965  | 0.277   |
| .pbc2 | 2.225    | 0.097   | 22.950  | 0.000   | 2.225  | 0.523   |
| .pbc3 | 0.843    | 0.093   | 9.071   | 0.000   | 0.843  | 0.199   |
| .int1 | 3.136    | 0.120   | 26.069  | 0.000   | 3.136  | 0.520   |
| ATT   | 3.800    | 0.093   | 40.656  | 0.000   | 1.000  | 1.000   |
| SN    | 3.029    | 0.095   | 32.003  | 0.000   | 1.000  | 1.000   |
| PBC   | 2.030    | 0.108   | 18.792  | 0.000   | 1.000  | 1.000   |

R-Square:

|      | Estimate |
|------|----------|
| att1 | 0.883    |
| att3 | 0.890    |
| sn2  | 0.665    |
| sn4  | 0.723    |
| pbc2 | 0.477    |
| pbc3 | 0.801    |
| int1 | 0.480    |

## A5. Robustness analysis “Model 1”, WLSMV estimator.

```

> # WLSMV (for robustness)
> f1.1 <- sem(m1,data=tpb_data,ordered = c("int1"),estimator="WLSMV")
> summary(f1.1,standardized=TRUE,fit.measures=TRUE,rsquare=TRUE)
lavaan 0.6-9 ended normally after 111 iterations

Estimator                      DWLS
Optimization method             NLMINB
Number of model parameters      30

Number of observations          Used      Total
                               3107     3532

Model Test User Model:

Test Statistic                  Standard      Robust
Degrees of freedom              1.105        28.383
P-value (Chi-square)           9            9
Scaling correction factor       0.999        0.001
Shift parameter                 0.042        2.228
    simple second-order correction

Model Test Baseline Model:

Test statistic                   7869.304     2555.197
Degrees of freedom               21           21
P-value                          0.000        0.000
Scaling correction factor        3.097

User Model versus Baseline Model:

Comparative Fit Index (CFI)     1.000        0.992
Tucker-Lewis Index (TLI)       1.002        0.982

Robust Comparative Fit Index (CFI)      NA
Robust Tucker-Lewis Index (TLI)        NA

Root Mean Square Error of Approximation:

RMSEA                           0.000        0.026
90 Percent confidence interval - lower 0.000        0.016
90 Percent confidence interval - upper 0.000        0.038
P-value RMSEA <= 0.05            1.000        1.000

Robust RMSEA                      NA
90 Percent confidence interval - lower NA
90 Percent confidence interval - upper NA

Standardized Root Mean Square Residual:

SRMR                             0.006        0.006

Parameter Estimates:

Standard errors                   Robust.sem
Information                       Expected
Information saturated (h1) model   Unstructured

Latent Variables:

Estimate  Std.Err  z-value  P(>|z|)  Std.lv  Std.all
ATT =~
  att1    1.000
  att3    1.061    0.029   37.217   0.000   1.888   0.937
SN =~
  sn2     1.000
  sn4     0.907    0.030   30.670   0.000   1.689   0.808
PBC =~
  pbc2    1.000
  pbc3    1.259    0.048   25.992   0.000   1.532   0.843
  pbc3    1.000
  pbc3    1.259    0.048   25.992   0.000   1.389   0.694
  pbc3    1.259    0.048   25.992   0.000   1.748   0.882

Regressions:

Estimate  Std.Err  z-value  P(>|z|)  Std.lv  Std.all
int1 ~
  ATT     0.375    0.023   16.458   0.000   0.708   0.708

```

|              |          |         |         |         |        |         |
|--------------|----------|---------|---------|---------|--------|---------|
| SN           | -0.009   | 0.024   | -0.372  | 0.710   | -0.015 | -0.015  |
| PBC          | 0.003    | 0.021   | 0.168   | 0.867   | 0.005  | 0.005   |
| Covariances: |          |         |         |         |        |         |
|              | Estimate | Std.Err | z-value | P(> z ) | Std.lv | Std.all |
| ATT ~~       |          |         |         |         |        |         |
| SN           | 2.700    | 0.140   | 19.275  | 0.000   | 0.847  | 0.847   |
| PBC          | 2.042    | 0.124   | 16.472  | 0.000   | 0.779  | 0.779   |
| SN ~~        |          |         |         |         |        |         |
| PBC          | 1.603    | 0.104   | 15.463  | 0.000   | 0.683  | 0.683   |
| Intercepts:  |          |         |         |         |        |         |
|              | Estimate | Std.Err | z-value | P(> z ) | Std.lv | Std.all |
| .att1        | 5.383    | 0.056   | 95.504  | 0.000   | 5.383  | 2.671   |
| .att3        | 5.124    | 0.055   | 93.797  | 0.000   | 5.124  | 2.408   |
| .sn2         | 4.571    | 0.043   | 107.513 | 0.000   | 4.571  | 2.188   |
| .sn4         | 5.222    | 0.044   | 120.025 | 0.000   | 5.222  | 2.874   |
| .pbc2        | 5.311    | 0.054   | 98.301  | 0.000   | 5.311  | 2.653   |
| .pbc3        | 5.421    | 0.058   | 92.886  | 0.000   | 5.421  | 2.734   |
| .int1        | 0.000    |         |         |         | 0.000  | 0.000   |
| ATT          | 0.000    |         |         |         | 0.000  | 0.000   |
| SN           | 0.000    |         |         |         | 0.000  | 0.000   |
| PBC          | 0.000    |         |         |         | 0.000  | 0.000   |
| Thresholds:  |          |         |         |         |        |         |
|              | Estimate | Std.Err | z-value | P(> z ) | Std.lv | Std.all |
| int1 t1      | -0.908   | 0.026   | -34.660 | 0.000   | -0.908 | -0.908  |
| int1 t2      | -0.635   | 0.024   | -26.231 | 0.000   | -0.635 | -0.635  |
| int1 t3      | -0.469   | 0.023   | -20.026 | 0.000   | -0.469 | -0.469  |
| int1 t4      | -0.279   | 0.023   | -12.236 | 0.000   | -0.279 | -0.279  |
| int1 t5      | -0.149   | 0.023   | -6.617  | 0.000   | -0.149 | -0.149  |
| int1 t6      | 0.059    | 0.023   | 2.637   | 0.008   | 0.059  | 0.059   |
| Variances:   |          |         |         |         |        |         |
|              | Estimate | Std.Err | z-value | P(> z ) | Std.lv | Std.all |
| .att1        | 0.497    | 0.026   | 19.237  | 0.000   | 0.497  | 0.122   |
| .att3        | 0.518    | 0.028   | 18.518  | 0.000   | 0.518  | 0.114   |
| .sn2         | 1.513    | 0.045   | 33.408  | 0.000   | 1.513  | 0.346   |
| .sn4         | 0.953    | 0.037   | 25.999  | 0.000   | 0.953  | 0.289   |
| .pbc2        | 2.079    | 0.061   | 33.882  | 0.000   | 2.079  | 0.519   |
| .pbc3        | 0.875    | 0.057   | 15.221  | 0.000   | 0.875  | 0.222   |
| .int1        | 0.512    |         |         |         | 0.512  | 0.512   |
| ATT          | 3.565    | 0.186   | 19.200  | 0.000   | 1.000  | 1.000   |
| SN           | 2.854    | 0.177   | 16.144  | 0.000   | 1.000  | 1.000   |
| PBC          | 1.930    | 0.139   | 13.872  | 0.000   | 1.000  | 1.000   |
| Scales y*:   |          |         |         |         |        |         |
|              | Estimate | Std.Err | z-value | P(> z ) | Std.lv | Std.all |
| int1         | 1.000    |         |         |         | 1.000  | 1.000   |
| R-Square:    |          |         |         |         |        |         |
|              | Estimate |         |         |         |        |         |
| att1         | 0.878    |         |         |         |        |         |
| att3         | 0.886    |         |         |         |        |         |
| sn2          | 0.654    |         |         |         |        |         |
| sn4          | 0.711    |         |         |         |        |         |
| pbc2         | 0.481    |         |         |         |        |         |
| pbc3         | 0.778    |         |         |         |        |         |
| int1         | 0.488    |         |         |         |        |         |

A6. Robustness analysis "Model 1", omitting subjective norm.

```
> ### TPB without SN (for robustness)
> m1.2 <- '
+ ATT=~att1+att3
+ SN =~sn2 + sn4
+ int1 ~ ATT+SN'
> f1.2 <- sem(m1.2,data=tpb_data,missing="FIML",estimator="MLR")
Warnmeldung:
In lav_data_full(data = data, group = group, cluster = cluster, :
lavaan WARNING: some cases are empty and will be ignored:
173 262 470 680 1001 1141 1610 1811 2366 2375 2400 2650 2651 2657 2674 2688 2702 2710 2813
2833 2848 2865 3009 3153 3331 3340 3511
> summary(f1.2,standardized=TRUE,rsquare=TRUE)
lavaan 0.6-9 ended normally after 46 iterations
```

|                            |        |       |
|----------------------------|--------|-------|
| Estimator                  | ML     |       |
| Optimization method        | NLMINB |       |
| Number of model parameters | 17     |       |
|                            | Used   | Total |
| Number of observations     | 3505   | 3532  |
| Number of missing patterns | 22     |       |

Model Test User Model:

|                                         |          |        |
|-----------------------------------------|----------|--------|
|                                         | Standard | Robust |
| Test Statistic                          | 15.658   | 13.739 |
| Degrees of freedom                      | 3        | 3      |
| P-value (Chi-square)                    | 0.001    | 0.003  |
| Scaling correction factor               |          | 1.140  |
| Yuan-Bentler correction (Mplus variant) |          |        |

Parameter Estimates:

|                               |          |
|-------------------------------|----------|
| Standard errors               | Sandwich |
| Information bread             | Observed |
| Observed information based on | Hessian  |

Latent Variables:

|        | Estimate | Std.Err | z-value | P(> z ) | Std.lv | Std.all |
|--------|----------|---------|---------|---------|--------|---------|
| ATT =~ |          |         |         |         |        |         |
| att1   | 1.000    |         |         |         | 1.956  | 0.944   |
| att3   | 1.048    | 0.011   | 99.206  | 0.000   | 2.049  | 0.939   |
| SN =~  |          |         |         |         |        |         |
| sn2    | 1.000    |         |         |         | 1.739  | 0.815   |
| sn4    | 0.912    | 0.020   | 46.396  | 0.000   | 1.586  | 0.850   |

Regressions:

|        | Estimate | Std.Err | z-value | P(> z ) | Std.lv | Std.all |
|--------|----------|---------|---------|---------|--------|---------|
| int1 ~ |          |         |         |         |        |         |
| ATT    | 0.971    | 0.039   | 24.718  | 0.000   | 1.900  | 0.774   |
| SN     | -0.137   | 0.046   | -2.955  | 0.003   | -0.238 | -0.097  |

Covariances:

|        | Estimate | Std.Err | z-value | P(> z ) | Std.lv | Std.all |
|--------|----------|---------|---------|---------|--------|---------|
| ATT ~~ |          |         |         |         |        |         |
| SN     | 2.884    | 0.076   | 37.773  | 0.000   | 0.848  | 0.848   |

Intercepts:

|       | Estimate | Std.Err | z-value | P(> z ) | Std.lv | Std.all |
|-------|----------|---------|---------|---------|--------|---------|
| .att1 | 5.248    | 0.035   | 148.478 | 0.000   | 5.248  | 2.532   |
| .att3 | 4.976    | 0.037   | 134.272 | 0.000   | 4.976  | 2.281   |
| .sn2  | 4.436    | 0.036   | 121.581 | 0.000   | 4.436  | 2.079   |
| .sn4  | 5.105    | 0.032   | 159.454 | 0.000   | 5.105  | 2.738   |
| .int1 | 4.751    | 0.042   | 114.485 | 0.000   | 4.751  | 1.935   |
| ATT   | 0.000    |         |         |         | 0.000  | 0.000   |
| SN    | 0.000    |         |         |         | 0.000  | 0.000   |

Variances:

|       | Estimate | Std.Err | z-value | P(> z ) | Std.lv | Std.all |
|-------|----------|---------|---------|---------|--------|---------|
| .att1 | 0.471    | 0.037   | 12.893  | 0.000   | 0.471  | 0.110   |
| .att3 | 0.559    | 0.042   | 13.315  | 0.000   | 0.559  | 0.118   |
| .sn2  | 1.530    | 0.079   | 19.417  | 0.000   | 1.530  | 0.336   |
| .sn4  | 0.962    | 0.062   | 15.399  | 0.000   | 0.962  | 0.277   |
| .int1 | 3.133    | 0.120   | 26.113  | 0.000   | 3.133  | 0.519   |

|           |          |       |        |       |       |       |
|-----------|----------|-------|--------|-------|-------|-------|
| ATT       | 3.825    | 0.094 | 40.587 | 0.000 | 1.000 | 1.000 |
| SN        | 3.022    | 0.094 | 31.987 | 0.000 | 1.000 | 1.000 |
| R-Square: |          |       |        |       |       |       |
|           | Estimate |       |        |       |       |       |
| att1      | 0.890    |       |        |       |       |       |
| att3      | 0.882    |       |        |       |       |       |
| sn2       | 0.664    |       |        |       |       |       |
| sn4       | 0.723    |       |        |       |       |       |
| int1      | 0.481    |       |        |       |       |       |

## A7. Robustness analysis "Model 1", omitting perceived behavioral control.

```

> ### TPB without PBC (for robustness)
> ml.3 <- '
+ ATT=~att1+att3
+ PBC=~pbc2+pbc3
+ int1 ~ ATT+PBC'
> f1.3 <- sem(ml.3,data=tpb_data,missing="FIML",estimator="MLR")
Warnmeldung:
In lav_data_full(data = data, group = group, cluster = cluster, :
lavaan WARNING: some cases are empty and will be ignored:
173 262 470 1001 1141 1610 1811 2366 2375 2400 2650 2651 2657 2674 2688 2702 2710 2813 2833
2848 2865 3009 3153 3340 3511
> summary(f1.3,standardized=TRUE,rsquare=TRUE)
lavaan 0.6-9 ended normally after 47 iterations

Estimator ML
Optimization method NLMINB
Number of model parameters 17

Number of observations Used Total
3507 3532
Number of missing patterns 22

Model Test User Model:

Test Statistic Standard Robust
24.495 21.807
Degrees of freedom 3 3
P-value (Chi-square) 0.000 0.000
Scaling correction factor 1.123
Yuan-Bentler correction (Mplus variant)

Parameter Estimates:

Standard errors Sandwich
Information bread Observed
Observed information based on Hessian

Latent Variables:
Estimate Std.Err z-value P(>|z|) Std.lv Std.all
ATT =~
att1 1.000 1.954 0.943
att3 1.050 0.011 92.988 0.000 2.053 0.941
PBC =~
pbc2 1.000 1.422 0.689
pbc3 1.296 0.042 31.216 0.000 1.842 0.896

Regressions:
Estimate Std.Err z-value P(>|z|) Std.lv Std.all
int1 ~
ATT 0.900 0.030 29.725 0.000 1.759 0.716
PBC -0.057 0.043 -1.333 0.183 -0.081 -0.033

Covariances:
Estimate Std.Err z-value P(>|z|) Std.lv Std.all
ATT ~~
PBC 2.208 0.085 26.048 0.000 0.794 0.794

Intercepts:
Estimate Std.Err z-value P(>|z|) Std.lv Std.all
.att1 5.249 0.035 148.534 0.000 5.249 2.531
.att3 4.978 0.037 134.335 0.000 4.978 2.281
.pbc2 5.194 0.035 146.642 0.000 5.194 2.518
.pbc3 5.283 0.035 150.274 0.000 5.283 2.570
.int1 4.753 0.041 114.527 0.000 4.753 1.935
ATT 0.000 0.000
PBC 0.000 0.000

Variances:
Estimate Std.Err z-value P(>|z|) Std.lv Std.all
.att1 0.480 0.036 13.472 0.000 0.480 0.112
.att3 0.547 0.045 12.063 0.000 0.547 0.115
.pbc2 2.232 0.097 22.922 0.000 2.232 0.525
.pbc3 0.831 0.094 8.868 0.000 0.831 0.197
.int1 3.155 0.120 26.285 0.000 3.155 0.523

```



|           |          |       |        |       |       |       |
|-----------|----------|-------|--------|-------|-------|-------|
| ATT       | 3.820    | 0.095 | 40.270 | 0.000 | 1.000 | 1.000 |
| PBC       | 2.022    | 0.108 | 18.696 | 0.000 | 1.000 | 1.000 |
| R-Square: |          |       |        |       |       |       |
|           | Estimate |       |        |       |       |       |
| att1      | 0.888    |       |        |       |       |       |
| att3      | 0.885    |       |        |       |       |       |
| pbc2      | 0.475    |       |        |       |       |       |
| pbc3      | 0.803    |       |        |       |       |       |
| int1      | 0.477    |       |        |       |       |       |

## A8. SEM "Model 2" (latent interactions).

```

> ### Testing latent interactions: PBC*ATT + PBC*SN
> # Compute products of indicators
> tpb.indprod.df <-
indProd(data=tpb_data, var1=c("att1", "att3"), var2=c("sn2", "sn4"), var3=c("pbc2", "pbc3"),
+       match=FALSE, meanC=FALSE, residualC=TRUE, doubleMC=FALSE)
> # The model:
> m2 <- '
+ # MEASUREMENT PART
+ ATT=~att1+att3
+ SN =~sn2 + sn4
+ PBC=~pbc2+pbc3
+ # INTERACTION TERMS
+ ATT_PBC=~att1.pbc2+att1.pbc3+att3.pbc2+att3.pbc3
+ SN_PBC =~sn2.pbc2+sn2.pbc3+sn4.pbc2+sn4.pbc3
+ # STRUCTURAL PART
+ int1~ATT+SN+PBC+ATT_PBC+SN_PBC
+ # RESIDUAL COVARIANCES
+ att1.pbc2~~ att3.pbc2+sn2.pbc2+sn4.pbc2+att1.pbc3
+ att3.pbc2~~ sn2.pbc2 +sn4.pbc2+att3.pbc3
+ sn2.pbc2 ~~ sn4.pbc2 +sn2.pbc3
+ att1.pbc3~~ att3.pbc3+sn2.pbc3+sn4.pbc3
+ att3.pbc3~~ sn2.pbc3 +sn4.pbc3
+ sn2.pbc3 ~~ sn4.pbc3
+ # COVARIANCES
+ PBC~~0*ATT_PBC+0*SN_PBC
+ ATT~~0*ATT_PBC
+ SN ~~0*SN_PBC'
> f2 <- sem(m2, data=tpb.indprod.df, missing="fiml", estimator="mlr")
Warnmeldung:
In lav_data_full(data = data, group = group, cluster = cluster, :
lavaan WARNING: some cases are empty and will be ignored:
173 262 470 1001 1141 1610 1811 2366 2375 2400 2650 2651 2657 2674 2688 2702 2710 2813 2833
2848 2865 3009 3153 3340 3511
> summary(f2, standardized=TRUE, fit.measures=TRUE, rsquare=TRUE)
lavaan 0.6-9 ended normally after 300 iterations

Estimator ML
Optimization method NLMINB
Number of model parameters 70

Number of observations Used Total
Number of missing patterns 52 3507 3532

Model Test User Model:

Test Statistic Standard Robust
Degrees of freedom 553.858 255.015 65 65
P-value (Chi-square) 0.000 0.000
Scaling correction factor 2.172
Yuan-Bentler correction (Mplus variant)

Model Test Baseline Model:

Test statistic 59161.185 17696.741
Degrees of freedom 105 105
P-value 0.000 0.000
Scaling correction factor 3.343

User Model versus Baseline Model:

Comparative Fit Index (CFI) 0.992 0.989
Tucker-Lewis Index (TLI) 0.987 0.983

Robust Comparative Fit Index (CFI) 0.993
Robust Tucker-Lewis Index (TLI) 0.989

Loglikelihood and Information Criteria:

Loglikelihood user model (H0) -113967.356 -113967.356
Scaling correction factor 4.312
for the MLR correction
Loglikelihood unrestricted model (H1) -113690.427 -113690.427

```

|                                                     |          |            |         |         |        |            |
|-----------------------------------------------------|----------|------------|---------|---------|--------|------------|
| Scaling correction factor<br>for the MLR correction |          |            |         |         |        | 3.281      |
| Akaike (AIC)                                        |          | 228074.712 |         |         |        | 228074.712 |
| Bayesian (BIC)                                      |          | 228506.088 |         |         |        | 228506.088 |
| Sample-size adjusted Bayesian (BIC)                 |          | 228283.664 |         |         |        | 228283.664 |
| Root Mean Square Error of Approximation:            |          |            |         |         |        |            |
| RMSEA                                               |          | 0.046      |         |         |        | 0.029      |
| 90 Percent confidence interval - lower              |          | 0.043      |         |         |        | 0.026      |
| 90 Percent confidence interval - upper              |          | 0.050      |         |         |        | 0.031      |
| P-value RMSEA <= 0.05                               |          | 0.954      |         |         |        | 1.000      |
| Robust RMSEA                                        |          |            |         |         |        | 0.043      |
| 90 Percent confidence interval - lower              |          |            |         |         |        | 0.037      |
| 90 Percent confidence interval - upper              |          |            |         |         |        | 0.048      |
| Standardized Root Mean Square Residual:             |          |            |         |         |        |            |
| SRMR                                                |          | 0.032      |         |         |        | 0.032      |
| Parameter Estimates:                                |          |            |         |         |        |            |
| Standard errors                                     |          |            |         |         |        | Sandwich   |
| Information bread                                   |          |            |         |         |        | Observed   |
| Observed information based on                       |          |            |         |         |        | Hessian    |
| Latent Variables:                                   |          |            |         |         |        |            |
|                                                     | Estimate | Std.Err    | z-value | P(> z ) | Std.lv | Std.all    |
| ATT =~                                              |          |            |         |         |        |            |
| att1                                                | 1.000    |            |         |         | 1.949  | 0.940      |
| att3                                                | 1.057    | 0.010      | 102.931 | 0.000   | 2.060  | 0.944      |
| SN =~                                               |          |            |         |         |        |            |
| sn2                                                 | 1.000    |            |         |         | 1.746  | 0.817      |
| sn4                                                 | 0.913    | 0.020      | 45.117  | 0.000   | 1.595  | 0.853      |
| PBC =~                                              |          |            |         |         |        |            |
| pbc2                                                | 1.000    |            |         |         | 1.425  | 0.691      |
| pbc3                                                | 1.291    | 0.041      | 31.600  | 0.000   | 1.840  | 0.895      |
| ATT_PBC =~                                          |          |            |         |         |        |            |
| att1.pbc2                                           | 1.000    |            |         |         | 8.378  | 0.908      |
| att1.pbc3                                           | 1.069    | 0.291      | 3.673   | 0.000   | 8.957  | 0.937      |
| att3.pbc2                                           | 0.953    | 0.013      | 71.968  | 0.000   | 7.984  | 0.893      |
| att3.pbc3                                           | 1.020    | 0.278      | 3.667   | 0.000   | 8.543  | 0.930      |
| SN_PBC =~                                           |          |            |         |         |        |            |
| sn2.pbc2                                            | 1.000    |            |         |         | 5.916  | 0.803      |
| sn2.pbc3                                            | 1.087    | 0.298      | 3.646   | 0.000   | 6.432  | 0.847      |
| sn4.pbc2                                            | 1.300    | 0.058      | 22.453  | 0.000   | 7.691  | 0.917      |
| sn4.pbc3                                            | 1.388    | 0.384      | 3.617   | 0.000   | 8.212  | 0.951      |
| Regressions:                                        |          |            |         |         |        |            |
|                                                     | Estimate | Std.Err    | z-value | P(> z ) | Std.lv | Std.all    |
| intl ~                                              |          |            |         |         |        |            |
| ATT                                                 | 1.009    | 0.052      | 19.216  | 0.000   | 1.966  | 0.801      |
| SN                                                  | -0.141   | 0.048      | -2.920  | 0.004   | -0.246 | -0.100     |
| PBC                                                 | -0.054   | 0.044      | -1.234  | 0.217   | -0.077 | -0.031     |
| ATT_PBC                                             | -0.015   | 0.016      | -0.929  | 0.353   | -0.123 | -0.050     |
| SN_PBC                                              | 0.023    | 0.023      | 1.009   | 0.313   | 0.136  | 0.055      |
| Covariances:                                        |          |            |         |         |        |            |
|                                                     | Estimate | Std.Err    | z-value | P(> z ) | Std.lv | Std.all    |
| .att1.pbc2 ~~                                       |          |            |         |         |        |            |
| .att3.pbc2                                          | 12.692   | 18.240     | 0.696   | 0.487   | 12.692 | 0.814      |
| .sn2.pbc2                                           | 8.952    | 12.602     | 0.710   | 0.477   | 8.952  | 0.526      |
| .sn4.pbc2                                           | 8.773    | 16.450     | 0.533   | 0.594   | 8.773  | 0.675      |
| .att1.pbc3                                          | 1.749    | 0.514      | 3.405   | 0.001   | 1.749  | 0.135      |
| .att3.pbc2 ~~                                       |          |            |         |         |        |            |
| .sn2.pbc2                                           | 9.034    | 12.018     | 0.752   | 0.452   | 9.034  | 0.510      |
| .sn4.pbc2                                           | 8.766    | 15.690     | 0.559   | 0.576   | 8.766  | 0.649      |
| .att3.pbc3                                          | 2.371    | 0.476      | 4.986   | 0.000   | 2.371  | 0.174      |
| .sn2.pbc2 ~~                                        |          |            |         |         |        |            |
| .sn4.pbc2                                           | 8.862    | 12.267     | 0.722   | 0.470   | 8.862  | 0.600      |
| .sn2.pbc3                                           | 8.195    | 0.743      | 11.028  | 0.000   | 8.195  | 0.462      |
| .att1.pbc3 ~~                                       |          |            |         |         |        |            |
| .att3.pbc3                                          | 7.939    | 20.804     | 0.382   | 0.703   | 7.939  | 0.703      |

|               |          |         |         |         |        |         |
|---------------|----------|---------|---------|---------|--------|---------|
| .sn2.pbc3     | 5.769    | 14.769  | 0.391   | 0.696   | 5.769  | 0.429   |
| .sn4.pbc3     | 5.302    | 18.918  | 0.280   | 0.779   | 5.302  | 0.598   |
| .att3.pbc3 ~~ |          |         |         |         |        |         |
| .sn2.pbc3     | 5.816    | 14.100  | 0.412   | 0.680   | 5.816  | 0.426   |
| .sn4.pbc3     | 4.814    | 18.054  | 0.267   | 0.790   | 4.814  | 0.535   |
| .sn2.pbc3 ~~  |          |         |         |         |        |         |
| .sn4.pbc3     | 5.088    | 14.404  | 0.353   | 0.724   | 5.088  | 0.475   |
| PBC ~~        |          |         |         |         |        |         |
| ATT_PBC       | 0.000    |         |         |         | 0.000  | 0.000   |
| SN_PBC        | 0.000    |         |         |         | 0.000  | 0.000   |
| ATT ~~        |          |         |         |         |        |         |
| ATT_PBC       | 0.000    |         |         |         | 0.000  | 0.000   |
| SN ~~         |          |         |         |         |        |         |
| SN_PBC        | 0.000    |         |         |         | 0.000  | 0.000   |
| ATT ~~        |          |         |         |         |        |         |
| SN            | 2.880    | 0.077   | 37.308  | 0.000   | 0.846  | 0.846   |
| PBC           | 2.208    | 0.084   | 26.147  | 0.000   | 0.795  | 0.795   |
| SN_PBC        | -0.181   | 0.081   | -2.229  | 0.026   | -0.016 | -0.016  |
| SN ~~         |          |         |         |         |        |         |
| PBC           | 1.715    | 0.074   | 23.069  | 0.000   | 0.689  | 0.689   |
| ATT_PBC       | -0.504   | 0.160   | -3.153  | 0.002   | -0.034 | -0.034  |
| ATT_PBC ~~    |          |         |         |         |        |         |
| SN_PBC        | 46.704   | 13.429  | 3.478   | 0.001   | 0.942  | 0.942   |
| Intercepts:   |          |         |         |         |        |         |
|               | Estimate | Std.Err | z-value | P(> z ) | Std.lv | Std.all |
| .att1         | 5.246    | 0.035   | 148.335 | 0.000   | 5.246  | 2.529   |
| .att3         | 4.974    | 0.037   | 134.161 | 0.000   | 4.974  | 2.279   |
| .sn2          | 4.433    | 0.036   | 121.605 | 0.000   | 4.433  | 2.073   |
| .sn4          | 5.100    | 0.032   | 158.749 | 0.000   | 5.100  | 2.727   |
| .pbc2         | 5.193    | 0.035   | 146.569 | 0.000   | 5.193  | 2.518   |
| .pbc3         | 5.282    | 0.035   | 150.186 | 0.000   | 5.282  | 2.569   |
| .att1.pbc2    | 2.119    | 0.161   | 13.187  | 0.000   | 2.119  | 0.230   |
| .att1.pbc3    | 2.298    | 0.164   | 14.011  | 0.000   | 2.298  | 0.240   |
| .att3.pbc2    | 1.991    | 0.156   | 12.786  | 0.000   | 1.991  | 0.223   |
| .att3.pbc3    | 2.153    | 0.158   | 13.627  | 0.000   | 2.153  | 0.234   |
| .sn2.pbc2     | 1.516    | 0.140   | 10.807  | 0.000   | 1.516  | 0.206   |
| .sn2.pbc3     | 1.655    | 0.142   | 11.617  | 0.000   | 1.655  | 0.218   |
| .sn4.pbc2     | 1.956    | 0.149   | 13.126  | 0.000   | 1.956  | 0.233   |
| .sn4.pbc3     | 2.068    | 0.151   | 13.683  | 0.000   | 2.068  | 0.240   |
| .int1         | 4.752    | 0.041   | 114.512 | 0.000   | 4.752  | 1.936   |
| ATT           | 0.000    |         |         |         | 0.000  | 0.000   |
| SN            | 0.000    |         |         |         | 0.000  | 0.000   |
| PBC           | 0.000    |         |         |         | 0.000  | 0.000   |
| ATT_PBC       | 0.000    |         |         |         | 0.000  | 0.000   |
| SN_PBC        | 0.000    |         |         |         | 0.000  | 0.000   |
| Variances:    |          |         |         |         |        |         |
|               | Estimate | Std.Err | z-value | P(> z ) | Std.lv | Std.all |
| .att1         | 0.504    | 0.035   | 14.521  | 0.000   | 0.504  | 0.117   |
| .att3         | 0.521    | 0.039   | 13.194  | 0.000   | 0.521  | 0.109   |
| .sn2          | 1.521    | 0.080   | 19.132  | 0.000   | 1.521  | 0.333   |
| .sn4          | 0.955    | 0.063   | 15.269  | 0.000   | 0.955  | 0.273   |
| .pbc2         | 2.225    | 0.097   | 22.915  | 0.000   | 2.225  | 0.523   |
| .pbc3         | 0.843    | 0.093   | 9.070   | 0.000   | 0.843  | 0.199   |
| .att1.pbc2    | 14.998   | 19.136  | 0.784   | 0.433   | 14.998 | 0.176   |
| .att1.pbc3    | 11.133   | 21.762  | 0.512   | 0.609   | 11.133 | 0.122   |
| .att3.pbc2    | 16.212   | 17.411  | 0.931   | 0.352   | 16.212 | 0.203   |
| .att3.pbc3    | 11.453   | 19.903  | 0.575   | 0.565   | 11.453 | 0.136   |
| .sn2.pbc2     | 19.342   | 9.483   | 2.040   | 0.041   | 19.342 | 0.356   |
| .sn2.pbc3     | 16.272   | 11.335  | 1.436   | 0.151   | 16.272 | 0.282   |
| .sn4.pbc2     | 11.265   | 16.023  | 0.703   | 0.482   | 11.265 | 0.160   |
| .sn4.pbc3     | 7.058    | 18.408  | 0.383   | 0.701   | 7.058  | 0.095   |
| .int1         | 3.135    | 0.120   | 26.081  | 0.000   | 3.135  | 0.520   |
| ATT           | 3.798    | 0.094   | 40.250  | 0.000   | 1.000  | 1.000   |
| SN            | 3.050    | 0.097   | 31.507  | 0.000   | 1.000  | 1.000   |
| PBC           | 2.030    | 0.108   | 18.826  | 0.000   | 1.000  | 1.000   |
| ATT_PBC       | 70.196   | 19.795  | 3.546   | 0.000   | 1.000  | 1.000   |
| SN_PBC        | 35.004   | 10.444  | 3.352   | 0.001   | 1.000  | 1.000   |
| R-Square:     |          |         |         |         |        |         |
|               | Estimate |         |         |         |        |         |
| att1          | 0.883    |         |         |         |        |         |
| att3          | 0.891    |         |         |         |        |         |
| sn2           | 0.667    |         |         |         |        |         |

|           |       |
|-----------|-------|
| sn4       | 0.727 |
| pbc2      | 0.477 |
| pbc3      | 0.801 |
| att1.pbc2 | 0.824 |
| att1.pbc3 | 0.878 |
| att3.pbc2 | 0.797 |
| att3.pbc3 | 0.864 |
| sn2.pbc2  | 0.644 |
| sn2.pbc3  | 0.718 |
| sn4.pbc2  | 0.840 |
| sn4.pbc3  | 0.905 |
| int1      | 0.480 |

## A9. SEM "Model 3".

```

> ##### TESTING THE TPB (ATTITUDE) AND BACKGROUND FACTORS (main model)
> m3 <- '
+ # MEASUREMENT PART
+ ATT=~att1+att3
+ CCB=~ccb1+ccb2+ccb3+ccb4+ccb5+ccb6+ccb7+ccb8
+ SKV=~skv1+skv2+skv3
+ SKD=~skd1+skd2
+ FCV=~fcv1+fcv2+fcv3
+ TPO=~tpo1+tpo2+tpo3+tpo4+tpo5+tpo6
+ TSC=~tsc1+tsc2+tsc3+tsc4
+ # STRUCTURAL PART
+ int1 ~ a*ATT
+ int1 ~
b1*CCB+c1*SKV+d1*SKD+e1*FCV+f1*TPO+g1*TSC+h1*health+i1*risk2+j1*risk3+k1*rel+l1*pol+m1*age2+n1
*age3+o1*male+p1*edu+q1*inc+r1*imm+s1*part+t1*kids
+ ATT ~
b2*CCB+c2*SKV+d2*SKD+e2*FCV+f2*TPO+g2*TSC+h2*health+i2*risk2+j2*risk3+k2*rel+l2*pol+m2*age2+n2
*age3+o2*male+p2*edu+q2*inc+r2*imm+s2*part+t2*kids
+ # INDIRECT EFFECTS
+ i_ccb := a*b2
+ i_skv := a*c2
+ i_skd := a*d2
+ i_fcv := a*e2
+ i_tpo := a*f2
+ i_tsc := a*g2
+ i_hea := a*h2
+ i_ri2 := a*i2
+ i_ri3 := a*j2
+ i_rel := a*k2
+ i_pol := a*l2
+ i_ag2 := a*m2
+ i_ag3 := a*n2
+ i_mal := a*o2
+ i_edu := a*p2
+ i_inc := a*q2
+ i_imm := a*r2
+ i_par := a*s2
+ i_kid := a*t2
+ # TOTAL EFFECTS
+ t_ccb := (a*b2)+b1
+ t_skv := (a*c2)+c1
+ t_skd := (a*d2)+d1
+ t_fcv := (a*e2)+e1
+ t_tpo := (a*f2)+f1
+ t_tsc := (a*g2)+g1
+ t_hea := (a*h2)+h1
+ t_ri2 := (a*i2)+i1
+ t_ri3 := (a*j2)+j1
+ t_rel := (a*k2)+k1
+ t_pol := (a*l2)+l1
+ t_ag2 := (a*m2)+m1
+ t_ag3 := (a*n2)+n1
+ t_mal := (a*o2)+o1
+ t_edu := (a*p2)+p1
+ t_inc := (a*q2)+q1
+ t_imm := (a*r2)+r1
+ t_par := (a*s2)+s1
+ t_kid := (a*t2)+t1
+ '
> f3 <- sem(m3,data=tpb_data,missing="FIML",estimator="MLR")
Warnmeldung:
In lav_data_full(data = data, group = group, cluster = cluster, :
lavaan WARNING: 422 cases were deleted due to missing values in
exogenous variable(s), while fixed.x = TRUE.
> summary(f3,standardized=TRUE,fit.measures=TRUE,rsquare=TRUE)
lavaan 0.6-9 ended normally after 121 iterations

Estimator                               ML
Optimization method                     NLMINB
Number of model parameters               140

Used Total
Number of observations                   3110 3532

```

|                                                     |          |             |         |             |        |         |
|-----------------------------------------------------|----------|-------------|---------|-------------|--------|---------|
| Number of missing patterns                          | 220      |             |         |             |        |         |
| Model Test User Model:                              |          |             |         |             |        |         |
|                                                     |          | Standard    |         | Robust      |        |         |
| Test Statistic                                      |          | 6256.439    |         | 5357.172    |        |         |
| Degrees of freedom                                  |          | 701         |         | 701         |        |         |
| P-value (Chi-square)                                |          | 0.000       |         | 0.000       |        |         |
| Scaling correction factor                           |          |             |         | 1.168       |        |         |
| Yuan-Bentler correction (Mplus variant)             |          |             |         |             |        |         |
| Model Test Baseline Model:                          |          |             |         |             |        |         |
| Test statistic                                      |          | 79212.762   |         | 64785.667   |        |         |
| Degrees of freedom                                  |          | 783         |         | 783         |        |         |
| P-value                                             |          | 0.000       |         | 0.000       |        |         |
| Scaling correction factor                           |          |             |         | 1.223       |        |         |
| User Model versus Baseline Model:                   |          |             |         |             |        |         |
| Comparative Fit Index (CFI)                         |          | 0.929       |         | 0.927       |        |         |
| Tucker-Lewis Index (TLI)                            |          | 0.921       |         | 0.919       |        |         |
| Robust Comparative Fit Index (CFI)                  |          |             |         | 0.931       |        |         |
| Robust Tucker-Lewis Index (TLI)                     |          |             |         | 0.922       |        |         |
| Loglikelihood and Information Criteria:             |          |             |         |             |        |         |
| Loglikelihood user model (H0)                       |          | -136218.027 |         | -136218.027 |        |         |
| Scaling correction factor<br>for the MLR correction |          |             |         | 1.457       |        |         |
| Loglikelihood unrestricted model (H1)               |          | -133089.808 |         | -133089.808 |        |         |
| Scaling correction factor<br>for the MLR correction |          |             |         | 1.216       |        |         |
| Akaike (AIC)                                        |          | 272716.055  |         | 272716.055  |        |         |
| Bayesian (BIC)                                      |          | 273561.988  |         | 273561.988  |        |         |
| Sample-size adjusted Bayesian (BIC)                 |          | 273117.150  |         | 273117.150  |        |         |
| Root Mean Square Error of Approximation:            |          |             |         |             |        |         |
| RMSEA                                               |          | 0.050       |         | 0.046       |        |         |
| 90 Percent confidence interval - lower              |          | 0.049       |         | 0.045       |        |         |
| 90 Percent confidence interval - upper              |          | 0.052       |         | 0.047       |        |         |
| P-value RMSEA <= 0.05                               |          | 0.244       |         | 1.000       |        |         |
| Robust RMSEA                                        |          |             |         | 0.050       |        |         |
| 90 Percent confidence interval - lower              |          |             |         | 0.049       |        |         |
| 90 Percent confidence interval - upper              |          |             |         | 0.051       |        |         |
| Standardized Root Mean Square Residual:             |          |             |         |             |        |         |
| SRMR                                                |          | 0.061       |         | 0.061       |        |         |
| Parameter Estimates:                                |          |             |         |             |        |         |
| Standard errors                                     |          |             |         | Sandwich    |        |         |
| Information bread                                   |          |             |         | Observed    |        |         |
| Observed information based on                       |          |             |         | Hessian     |        |         |
| Latent Variables:                                   |          |             |         |             |        |         |
|                                                     | Estimate | Std.Err     | z-value | P(> z )     | Std.lv | Std.all |
| ATT =~                                              |          |             |         |             |        |         |
| att1                                                | 1.000    |             |         |             | 1.931  | 0.950   |
| att3                                                | 1.028    | 0.011       | 94.045  | 0.000       | 1.985  | 0.929   |
| CCB =~                                              |          |             |         |             |        |         |
| ccb1                                                | 1.000    |             |         |             | 1.191  | 0.759   |
| ccb2                                                | 0.972    | 0.030       | 32.515  | 0.000       | 1.158  | 0.690   |
| ccb3                                                | 0.889    | 0.029       | 30.226  | 0.000       | 1.059  | 0.816   |
| ccb4                                                | 0.678    | 0.034       | 20.063  | 0.000       | 0.807  | 0.749   |
| ccb5                                                | 0.932    | 0.032       | 29.528  | 0.000       | 1.110  | 0.845   |
| ccb6                                                | 1.158    | 0.030       | 38.078  | 0.000       | 1.379  | 0.849   |
| ccb7                                                | 1.144    | 0.032       | 36.249  | 0.000       | 1.362  | 0.820   |
| ccb8                                                | 0.995    | 0.029       | 34.735  | 0.000       | 1.185  | 0.858   |
| SKV =~                                              |          |             |         |             |        |         |
| skv1                                                | 1.000    |             |         |             | 1.393  | 0.828   |

|              |          |         |         |         |        |         |
|--------------|----------|---------|---------|---------|--------|---------|
| skv2         | 1.176    | 0.020   | 57.564  | 0.000   | 1.638  | 0.907   |
| skv3         | 1.206    | 0.021   | 58.159  | 0.000   | 1.680  | 0.939   |
| SKD =~       |          |         |         |         |        |         |
| skd1         | 1.000    |         |         |         | 1.130  | 0.726   |
| skd2         | 1.067    | 0.044   | 24.405  | 0.000   | 1.206  | 0.764   |
| FCV =~       |          |         |         |         |        |         |
| fcv1         | 1.000    |         |         |         | 1.518  | 0.823   |
| fcv2         | 1.017    | 0.026   | 38.631  | 0.000   | 1.544  | 0.858   |
| fcv3         | 0.878    | 0.020   | 44.170  | 0.000   | 1.332  | 0.713   |
| TPO =~       |          |         |         |         |        |         |
| tpo1         | 1.000    |         |         |         | 1.815  | 0.963   |
| tpo2         | 0.974    | 0.005   | 196.226 | 0.000   | 1.767  | 0.964   |
| tpo3         | 0.919    | 0.009   | 103.931 | 0.000   | 1.667  | 0.887   |
| tpo4         | 0.779    | 0.012   | 66.873  | 0.000   | 1.413  | 0.800   |
| tpo5         | 0.845    | 0.007   | 114.059 | 0.000   | 1.534  | 0.904   |
| tpo6         | 0.810    | 0.010   | 79.337  | 0.000   | 1.470  | 0.835   |
| TSC =~       |          |         |         |         |        |         |
| tsc1         | 1.000    |         |         |         | 1.293  | 0.819   |
| tsc2         | 1.189    | 0.021   | 55.697  | 0.000   | 1.537  | 0.880   |
| tsc3         | 1.364    | 0.029   | 47.408  | 0.000   | 1.763  | 0.881   |
| tsc4         | 1.045    | 0.021   | 50.309  | 0.000   | 1.351  | 0.777   |
| Regressions: |          |         |         |         |        |         |
|              | Estimate | Std.Err | z-value | P(> z ) | Std.lv | Std.all |
| int1 ~       |          |         |         |         |        |         |
| ATT (a)      | 0.895    | 0.032   | 28.358  | 0.000   | 1.729  | 0.709   |
| CCB (b1)     | 0.062    | 0.039   | 1.603   | 0.109   | 0.074  | 0.030   |
| SKV (c1)     | -0.015   | 0.042   | -0.368  | 0.713   | -0.021 | -0.009  |
| SKD (d1)     | 0.026    | 0.048   | 0.534   | 0.593   | 0.029  | 0.012   |
| FCV (e1)     | 0.020    | 0.032   | 0.644   | 0.519   | 0.031  | 0.013   |
| TPO (f1)     | 0.014    | 0.031   | 0.458   | 0.647   | 0.026  | 0.011   |
| TSC (g1)     | -0.065   | 0.056   | -1.164  | 0.244   | -0.085 | -0.035  |
| health (h1)  | 0.013    | 0.043   | 0.306   | 0.759   | 0.013  | 0.005   |
| risk2 (i1)   | -0.003   | 0.080   | -0.041  | 0.968   | -0.003 | -0.001  |
| risk3 (j1)   | -0.142   | 0.115   | -1.227  | 0.220   | -0.142 | -0.021  |
| rel (k1)     | -0.001   | 0.018   | -0.080  | 0.936   | -0.001 | -0.001  |
| pol (l1)     | 0.009    | 0.017   | 0.521   | 0.602   | 0.009  | 0.007   |
| age2 (m1)    | -0.043   | 0.089   | -0.477  | 0.633   | -0.043 | -0.009  |
| age3 (n1)    | 0.087    | 0.116   | 0.748   | 0.455   | 0.087  | 0.014   |
| male (o1)    | -0.105   | 0.069   | -1.522  | 0.128   | -0.105 | -0.022  |
| edu (p1)     | 0.024    | 0.087   | 0.270   | 0.787   | 0.024  | 0.004   |
| inc (q1)     | 0.017    | 0.084   | 0.205   | 0.838   | 0.017  | 0.003   |
| imm (r1)     | -0.041   | 0.093   | -0.442  | 0.658   | -0.041 | -0.006  |
| part (s1)    | -0.042   | 0.074   | -0.577  | 0.564   | -0.042 | -0.008  |
| kids (t1)    | 0.024    | 0.082   | 0.297   | 0.766   | 0.024  | 0.004   |
| ATT ~        |          |         |         |         |        |         |
| CCB (b2)     | -0.232   | 0.034   | -6.802  | 0.000   | -0.143 | -0.143  |
| SKV (c2)     | -0.292   | 0.037   | -7.861  | 0.000   | -0.211 | -0.211  |
| SKD (d2)     | -0.045   | 0.036   | -1.227  | 0.220   | -0.026 | -0.026  |
| FCV (e2)     | 0.334    | 0.027   | 12.199  | 0.000   | 0.262  | 0.262   |
| TPO (f2)     | 0.016    | 0.022   | 0.747   | 0.455   | 0.015  | 0.015   |
| TSC (g2)     | 0.503    | 0.047   | 10.667  | 0.000   | 0.337  | 0.337   |
| health (h2)  | -0.032   | 0.033   | -0.968  | 0.333   | -0.016 | -0.015  |
| risk2 (i2)   | 0.020    | 0.058   | 0.337   | 0.736   | 0.010  | 0.005   |
| risk3 (j2)   | 0.122    | 0.086   | 1.427   | 0.153   | 0.063  | 0.023   |
| rel (k2)     | -0.013   | 0.014   | -0.958  | 0.338   | -0.007 | -0.013  |
| pol (l2)     | 0.017    | 0.014   | 1.200   | 0.230   | 0.009  | 0.017   |
| age2 (m2)    | 0.255    | 0.070   | 3.653   | 0.000   | 0.132  | 0.064   |
| age3 (n2)    | 0.425    | 0.088   | 4.834   | 0.000   | 0.220  | 0.087   |
| male (o2)    | 0.278    | 0.051   | 5.483   | 0.000   | 0.144  | 0.072   |
| edu (p2)     | 0.113    | 0.056   | 2.020   | 0.043   | 0.059  | 0.025   |
| inc (q2)     | 0.071    | 0.058   | 1.235   | 0.217   | 0.037  | 0.016   |
| imm (r2)     | -0.171   | 0.067   | -2.574  | 0.010   | -0.089 | -0.034  |
| part (s2)    | -0.013   | 0.056   | -0.225  | 0.822   | -0.007 | -0.003  |
| kids (t2)    | -0.116   | 0.061   | -1.908  | 0.056   | -0.060 | -0.026  |
| Covariances: |          |         |         |         |        |         |
|              | Estimate | Std.Err | z-value | P(> z ) | Std.lv | Std.all |
| CCB ~~       |          |         |         |         |        |         |
| SKV          | 0.953    | 0.049   | 19.585  | 0.000   | 0.575  | 0.575   |
| SKD          | 0.581    | 0.041   | 14.113  | 0.000   | 0.432  | 0.432   |
| FCV          | -0.516   | 0.049   | -10.534 | 0.000   | -0.285 | -0.285  |
| TPO          | -0.801   | 0.055   | -14.653 | 0.000   | -0.371 | -0.371  |
| TSC          | -0.821   | 0.048   | -17.129 | 0.000   | -0.533 | -0.533  |
| SKV ~~       |          |         |         |         |        |         |



|        |        |       |         |       |        |        |
|--------|--------|-------|---------|-------|--------|--------|
| SKD    | 0.854  | 0.045 | 18.976  | 0.000 | 0.542  | 0.542  |
| FCV    | -0.601 | 0.049 | -12.376 | 0.000 | -0.284 | -0.284 |
| TPO    | -1.407 | 0.052 | -26.954 | 0.000 | -0.557 | -0.557 |
| TSC    | -1.195 | 0.048 | -24.661 | 0.000 | -0.664 | -0.664 |
| SKD ~~ |        |       |         |       |        |        |
| FCV    | -0.645 | 0.050 | -12.982 | 0.000 | -0.376 | -0.376 |
| TPO    | -0.732 | 0.049 | -15.080 | 0.000 | -0.357 | -0.357 |
| TSC    | -0.684 | 0.040 | -16.958 | 0.000 | -0.468 | -0.468 |
| FCV ~~ |        |       |         |       |        |        |
| TPO    | 1.016  | 0.056 | 18.127  | 0.000 | 0.369  | 0.369  |
| TSC    | 0.910  | 0.048 | 19.103  | 0.000 | 0.463  | 0.463  |
| TPO ~~ |        |       |         |       |        |        |
| TSC    | 1.722  | 0.051 | 33.732  | 0.000 | 0.734  | 0.734  |

Intercepts:

|       | Estimate | Std.Err | z-value | P(> z ) | Std.lv | Std.all |
|-------|----------|---------|---------|---------|--------|---------|
| .att1 | 4.992    | 0.154   | 32.357  | 0.000   | 4.992  | 2.456   |
| .att3 | 4.728    | 0.159   | 29.791  | 0.000   | 4.728  | 2.213   |
| .ccb1 | 1.943    | 0.028   | 68.579  | 0.000   | 1.943  | 1.238   |
| .ccb2 | 2.212    | 0.031   | 72.323  | 0.000   | 2.212  | 1.319   |
| .ccb3 | 1.766    | 0.024   | 73.658  | 0.000   | 1.766  | 1.361   |
| .ccb4 | 1.447    | 0.020   | 70.613  | 0.000   | 1.447  | 1.343   |
| .ccb5 | 1.613    | 0.024   | 66.334  | 0.000   | 1.613  | 1.227   |
| .ccb6 | 2.029    | 0.030   | 68.701  | 0.000   | 2.029  | 1.250   |
| .ccb7 | 1.998    | 0.030   | 66.115  | 0.000   | 1.998  | 1.202   |
| .ccb8 | 1.709    | 0.026   | 66.615  | 0.000   | 1.709  | 1.237   |
| .skv1 | 3.216    | 0.031   | 103.834 | 0.000   | 3.216  | 1.911   |
| .skv2 | 3.882    | 0.033   | 118.820 | 0.000   | 3.882  | 2.150   |
| .skv3 | 3.545    | 0.032   | 109.391 | 0.000   | 3.545  | 1.981   |
| .skd1 | 3.586    | 0.028   | 127.981 | 0.000   | 3.586  | 2.303   |
| .skd2 | 4.173    | 0.028   | 146.760 | 0.000   | 4.173  | 2.642   |
| .fcv1 | 4.514    | 0.033   | 136.309 | 0.000   | 4.514  | 2.448   |
| .fcv2 | 5.179    | 0.032   | 160.180 | 0.000   | 5.179  | 2.877   |
| .fcv3 | 3.560    | 0.034   | 106.138 | 0.000   | 3.560  | 1.906   |
| .tpo1 | 3.438    | 0.034   | 101.604 | 0.000   | 3.438  | 1.824   |
| .tpo2 | 3.431    | 0.033   | 104.247 | 0.000   | 3.431  | 1.872   |
| .tpo3 | 3.601    | 0.034   | 106.715 | 0.000   | 3.601  | 1.916   |
| .tpo4 | 3.814    | 0.032   | 120.232 | 0.000   | 3.814  | 2.161   |
| .tpo5 | 2.951    | 0.030   | 96.853  | 0.000   | 2.951  | 1.740   |
| .tpo6 | 3.129    | 0.032   | 98.876  | 0.000   | 3.129  | 1.777   |
| .tsc1 | 5.200    | 0.028   | 183.511 | 0.000   | 5.200  | 3.294   |
| .tsc2 | 4.986    | 0.031   | 158.894 | 0.000   | 4.986  | 2.853   |
| .tsc3 | 4.587    | 0.036   | 127.748 | 0.000   | 4.587  | 2.293   |
| .tsc4 | 4.548    | 0.031   | 145.383 | 0.000   | 4.548  | 2.616   |
| .int1 | 4.551    | 0.236   | 19.290  | 0.000   | 4.551  | 1.866   |
| .ATT  | 0.000    |         |         |         | 0.000  | 0.000   |
| .CCB  | 0.000    |         |         |         | 0.000  | 0.000   |
| .SKV  | 0.000    |         |         |         | 0.000  | 0.000   |
| .SKD  | 0.000    |         |         |         | 0.000  | 0.000   |
| .FCV  | 0.000    |         |         |         | 0.000  | 0.000   |
| .TPO  | 0.000    |         |         |         | 0.000  | 0.000   |
| .TSC  | 0.000    |         |         |         | 0.000  | 0.000   |

Variances:

|       | Estimate | Std.Err | z-value | P(> z ) | Std.lv | Std.all |
|-------|----------|---------|---------|---------|--------|---------|
| .att1 | 0.402    | 0.035   | 11.516  | 0.000   | 0.402  | 0.097   |
| .att3 | 0.621    | 0.048   | 13.064  | 0.000   | 0.621  | 0.136   |
| .ccb1 | 1.045    | 0.058   | 18.135  | 0.000   | 1.045  | 0.424   |
| .ccb2 | 1.471    | 0.068   | 21.493  | 0.000   | 1.471  | 0.523   |
| .ccb3 | 0.563    | 0.037   | 15.265  | 0.000   | 0.563  | 0.334   |
| .ccb4 | 0.509    | 0.030   | 17.208  | 0.000   | 0.509  | 0.439   |
| .ccb5 | 0.495    | 0.034   | 14.677  | 0.000   | 0.495  | 0.287   |
| .ccb6 | 0.734    | 0.043   | 17.129  | 0.000   | 0.734  | 0.279   |
| .ccb7 | 0.906    | 0.057   | 15.986  | 0.000   | 0.906  | 0.328   |
| .ccb8 | 0.506    | 0.035   | 14.598  | 0.000   | 0.506  | 0.265   |
| .skv1 | 0.892    | 0.044   | 20.463  | 0.000   | 0.892  | 0.315   |
| .skv2 | 0.577    | 0.031   | 18.849  | 0.000   | 0.577  | 0.177   |
| .skv3 | 0.379    | 0.028   | 13.302  | 0.000   | 0.379  | 0.118   |
| .skd1 | 1.146    | 0.060   | 19.027  | 0.000   | 1.146  | 0.473   |
| .skd2 | 1.040    | 0.064   | 16.165  | 0.000   | 1.040  | 0.417   |
| .fcv1 | 1.095    | 0.078   | 14.010  | 0.000   | 1.095  | 0.322   |
| .fcv2 | 0.854    | 0.052   | 16.512  | 0.000   | 0.854  | 0.264   |
| .fcv3 | 1.714    | 0.056   | 30.616  | 0.000   | 1.714  | 0.491   |
| .tpo1 | 0.259    | 0.018   | 14.539  | 0.000   | 0.259  | 0.073   |
| .tpo2 | 0.236    | 0.017   | 14.286  | 0.000   | 0.236  | 0.070   |

|       |       |       |        |       |       |       |
|-------|-------|-------|--------|-------|-------|-------|
| .tpo3 | 0.753 | 0.037 | 20.197 | 0.000 | 0.753 | 0.213 |
| .tpo4 | 1.120 | 0.041 | 27.142 | 0.000 | 1.120 | 0.359 |
| .tpo5 | 0.525 | 0.021 | 25.252 | 0.000 | 0.525 | 0.183 |
| .tpo6 | 0.941 | 0.041 | 23.159 | 0.000 | 0.941 | 0.303 |
| .tsc1 | 0.820 | 0.035 | 23.249 | 0.000 | 0.820 | 0.329 |
| .tsc2 | 0.692 | 0.035 | 19.775 | 0.000 | 0.692 | 0.226 |
| .tsc3 | 0.893 | 0.047 | 19.033 | 0.000 | 0.893 | 0.223 |
| .tsc4 | 1.196 | 0.048 | 24.710 | 0.000 | 1.196 | 0.396 |
| .int1 | 3.188 | 0.128 | 24.918 | 0.000 | 3.188 | 0.536 |
| .ATT  | 1.417 | 0.057 | 24.969 | 0.000 | 0.380 | 0.380 |
| CCB   | 1.418 | 0.080 | 17.801 | 0.000 | 1.000 | 1.000 |
| SKV   | 1.941 | 0.071 | 27.357 | 0.000 | 1.000 | 1.000 |
| SKD   | 1.278 | 0.073 | 17.444 | 0.000 | 1.000 | 1.000 |
| FCV   | 2.305 | 0.094 | 24.477 | 0.000 | 1.000 | 1.000 |
| TPO   | 3.293 | 0.057 | 57.809 | 0.000 | 1.000 | 1.000 |
| TSC   | 1.671 | 0.070 | 23.881 | 0.000 | 1.000 | 1.000 |

R-Square:

|      | Estimate |
|------|----------|
| att1 | 0.903    |
| att3 | 0.864    |
| ccb1 | 0.576    |
| ccb2 | 0.477    |
| ccb3 | 0.666    |
| ccb4 | 0.561    |
| ccb5 | 0.713    |
| ccb6 | 0.721    |
| ccb7 | 0.672    |
| ccb8 | 0.735    |
| skv1 | 0.685    |
| skv2 | 0.823    |
| skv3 | 0.882    |
| skd1 | 0.527    |
| skd2 | 0.583    |
| fcv1 | 0.678    |
| fcv2 | 0.736    |
| fcv3 | 0.509    |
| tpo1 | 0.927    |
| tpo2 | 0.930    |
| tpo3 | 0.787    |
| tpo4 | 0.641    |
| tpo5 | 0.817    |
| tpo6 | 0.697    |
| tsc1 | 0.671    |
| tsc2 | 0.774    |
| tsc3 | 0.777    |
| tsc4 | 0.604    |
| int1 | 0.464    |
| ATT  | 0.620    |

Defined Parameters:

|       | Estimate | Std.Err | z-value | P(> z ) | Std.lv | Std.all |
|-------|----------|---------|---------|---------|--------|---------|
| i_ccb | -0.208   | 0.031   | -6.601  | 0.000   | -0.247 | -0.101  |
| i_skv | -0.262   | 0.034   | -7.649  | 0.000   | -0.364 | -0.149  |
| i_skd | -0.040   | 0.033   | -1.221  | 0.222   | -0.045 | -0.018  |
| i_fcv | 0.299    | 0.026   | 11.334  | 0.000   | 0.453  | 0.186   |
| i_tpo | 0.015    | 0.020   | 0.746   | 0.456   | 0.027  | 0.011   |
| i_tsc | 0.451    | 0.045   | 10.010  | 0.000   | 0.583  | 0.239   |
| i_hea | -0.029   | 0.029   | -0.968  | 0.333   | -0.029 | -0.011  |
| i_ri2 | 0.018    | 0.052   | 0.337   | 0.736   | 0.018  | 0.003   |
| i_ri3 | 0.110    | 0.077   | 1.421   | 0.155   | 0.110  | 0.016   |
| i_rel | -0.012   | 0.012   | -0.960  | 0.337   | -0.012 | -0.009  |
| i_pol | 0.015    | 0.012   | 1.199   | 0.231   | 0.015  | 0.012   |
| i_ag2 | 0.228    | 0.063   | 3.619   | 0.000   | 0.228  | 0.046   |
| i_ag3 | 0.381    | 0.080   | 4.765   | 0.000   | 0.381  | 0.061   |
| i_mal | 0.249    | 0.046   | 5.376   | 0.000   | 0.249  | 0.051   |
| i_edu | 0.101    | 0.050   | 2.017   | 0.044   | 0.101  | 0.018   |
| i_inc | 0.064    | 0.052   | 1.232   | 0.218   | 0.064  | 0.011   |
| i_imm | -0.153   | 0.060   | -2.570  | 0.010   | -0.153 | -0.024  |
| i_par | -0.011   | 0.050   | -0.225  | 0.822   | -0.011 | -0.002  |
| i_kid | -0.104   | 0.054   | -1.905  | 0.057   | -0.104 | -0.018  |
| t_ccb | -0.146   | 0.045   | -3.265  | 0.001   | -0.173 | -0.071  |
| t_skv | -0.277   | 0.050   | -5.493  | 0.000   | -0.386 | -0.158  |
| t_skd | -0.014   | 0.056   | -0.253  | 0.800   | -0.016 | -0.007  |
| t_fcv | 0.319    | 0.037   | 8.538   | 0.000   | 0.484  | 0.199   |

|        |        |       |        |       |        |        |
|--------|--------|-------|--------|-------|--------|--------|
| t_tpo  | 0.029  | 0.035 | 0.826  | 0.409 | 0.053  | 0.022  |
| t_tsc  | 0.385  | 0.064 | 5.989  | 0.000 | 0.498  | 0.204  |
| t_heal | -0.015 | 0.050 | -0.305 | 0.760 | -0.015 | -0.006 |
| t_ri2  | 0.014  | 0.092 | 0.157  | 0.875 | 0.014  | 0.003  |
| t_ri3  | -0.032 | 0.136 | -0.237 | 0.813 | -0.032 | -0.005 |
| t_rel  | -0.013 | 0.021 | -0.644 | 0.520 | -0.013 | -0.010 |
| t_pol  | 0.024  | 0.020 | 1.182  | 0.237 | 0.024  | 0.019  |
| t_ag2  | 0.186  | 0.103 | 1.800  | 0.072 | 0.186  | 0.037  |
| t_ag3  | 0.467  | 0.134 | 3.496  | 0.000 | 0.467  | 0.075  |
| t_mal  | 0.144  | 0.079 | 1.824  | 0.068 | 0.144  | 0.030  |
| t_edu  | 0.125  | 0.095 | 1.311  | 0.190 | 0.125  | 0.022  |
| t_inc  | 0.081  | 0.094 | 0.859  | 0.390 | 0.081  | 0.015  |
| t_imm  | -0.195 | 0.104 | -1.878 | 0.060 | -0.195 | -0.030 |
| t_par  | -0.054 | 0.086 | -0.626 | 0.531 | -0.054 | -0.011 |
| t_kid  | -0.079 | 0.093 | -0.853 | 0.394 | -0.079 | -0.014 |

```
> standardizedSolution(f3,type="std.nox")
```

|    | lhs  | op | rhs    | label | est    | std   | se      | z     | pvalue | ci.lower | ci.upper |
|----|------|----|--------|-------|--------|-------|---------|-------|--------|----------|----------|
| 1  | ATT  | == | att1   |       | 0.950  | 0.005 | 207.082 | 0.000 | 0.941  | 0.959    |          |
| 2  | ATT  | == | att3   |       | 0.929  | 0.006 | 164.819 | 0.000 | 0.918  | 0.940    |          |
| 3  | CCB  | == | ccb1   |       | 0.759  | 0.014 | 54.094  | 0.000 | 0.731  | 0.786    |          |
| 4  | CCB  | == | ccb2   |       | 0.690  | 0.014 | 47.741  | 0.000 | 0.662  | 0.719    |          |
| 5  | CCB  | == | ccb3   |       | 0.816  | 0.013 | 62.434  | 0.000 | 0.790  | 0.842    |          |
| 6  | CCB  | == | ccb4   |       | 0.749  | 0.017 | 43.389  | 0.000 | 0.715  | 0.783    |          |
| 7  | CCB  | == | ccb5   |       | 0.845  | 0.012 | 72.250  | 0.000 | 0.822  | 0.868    |          |
| 8  | CCB  | == | ccb6   |       | 0.849  | 0.009 | 96.303  | 0.000 | 0.832  | 0.867    |          |
| 9  | CCB  | == | ccb7   |       | 0.820  | 0.011 | 72.708  | 0.000 | 0.797  | 0.842    |          |
| 10 | CCB  | == | ccb8   |       | 0.858  | 0.010 | 85.114  | 0.000 | 0.838  | 0.877    |          |
| 11 | SKV  | == | skv1   |       | 0.828  | 0.010 | 86.596  | 0.000 | 0.809  | 0.847    |          |
| 12 | SKV  | == | skv2   |       | 0.907  | 0.005 | 166.573 | 0.000 | 0.897  | 0.918    |          |
| 13 | SKV  | == | skv3   |       | 0.939  | 0.005 | 191.153 | 0.000 | 0.929  | 0.949    |          |
| 14 | SKD  | == | skd1   |       | 0.726  | 0.017 | 41.762  | 0.000 | 0.692  | 0.760    |          |
| 15 | SKD  | == | skd2   |       | 0.764  | 0.017 | 44.564  | 0.000 | 0.730  | 0.797    |          |
| 16 | FCV  | == | fcv1   |       | 0.823  | 0.014 | 59.257  | 0.000 | 0.796  | 0.851    |          |
| 17 | FCV  | == | fcv2   |       | 0.858  | 0.010 | 87.457  | 0.000 | 0.839  | 0.877    |          |
| 18 | FCV  | == | fcv3   |       | 0.713  | 0.011 | 63.118  | 0.000 | 0.691  | 0.735    |          |
| 19 | TPO  | == | tpo1   |       | 0.963  | 0.003 | 364.722 | 0.000 | 0.958  | 0.968    |          |
| 20 | TPO  | == | tpo2   |       | 0.964  | 0.003 | 366.716 | 0.000 | 0.959  | 0.969    |          |
| 21 | TPO  | == | tpo3   |       | 0.887  | 0.006 | 145.014 | 0.000 | 0.875  | 0.899    |          |
| 22 | TPO  | == | tpo4   |       | 0.800  | 0.009 | 91.961  | 0.000 | 0.783  | 0.817    |          |
| 23 | TPO  | == | tpo5   |       | 0.904  | 0.004 | 212.786 | 0.000 | 0.896  | 0.912    |          |
| 24 | TPO  | == | tpo6   |       | 0.835  | 0.008 | 104.258 | 0.000 | 0.819  | 0.850    |          |
| 25 | TSC  | == | tsc1   |       | 0.819  | 0.009 | 87.998  | 0.000 | 0.801  | 0.837    |          |
| 26 | TSC  | == | tsc2   |       | 0.880  | 0.007 | 130.320 | 0.000 | 0.866  | 0.893    |          |
| 27 | TSC  | == | tsc3   |       | 0.881  | 0.007 | 131.131 | 0.000 | 0.868  | 0.895    |          |
| 28 | TSC  | == | tsc4   |       | 0.777  | 0.010 | 74.047  | 0.000 | 0.757  | 0.798    |          |
| 29 | int1 | ~  | ATT    | a     | 0.709  | 0.026 | 27.613  | 0.000 | 0.659  | 0.759    |          |
| 30 | int1 | ~  | CCB    | b1    | 0.030  | 0.019 | 1.605   | 0.109 | -0.007 | 0.067    |          |
| 31 | int1 | ~  | SKV    | c1    | -0.009 | 0.024 | -0.368  | 0.713 | -0.056 | 0.038    |          |
| 32 | int1 | ~  | SKD    | d1    | 0.012  | 0.022 | 0.534   | 0.593 | -0.032 | 0.056    |          |
| 33 | int1 | ~  | FCV    | e1    | 0.013  | 0.020 | 0.645   | 0.519 | -0.026 | 0.051    |          |
| 34 | int1 | ~  | TPO    | f1    | 0.011  | 0.023 | 0.458   | 0.647 | -0.035 | 0.056    |          |
| 35 | int1 | ~  | TSC    | g1    | -0.035 | 0.030 | -1.165  | 0.244 | -0.093 | 0.024    |          |
| 36 | int1 | ~  | health | h1    | 0.005  | 0.018 | 0.306   | 0.759 | -0.029 | 0.040    |          |
| 37 | int1 | ~  | risk2  | i1    | -0.001 | 0.033 | -0.041  | 0.968 | -0.065 | 0.063    |          |
| 38 | int1 | ~  | risk3  | j1    | -0.058 | 0.047 | -1.228  | 0.219 | -0.151 | 0.035    |          |
| 39 | int1 | ~  | rel    | k1    | -0.001 | 0.007 | -0.080  | 0.936 | -0.015 | 0.014    |          |
| 40 | int1 | ~  | pol    | l1    | 0.004  | 0.007 | 0.522   | 0.602 | -0.010 | 0.018    |          |
| 41 | int1 | ~  | age2   | m1    | -0.017 | 0.037 | -0.477  | 0.633 | -0.089 | 0.054    |          |
| 42 | int1 | ~  | age3   | n1    | 0.036  | 0.048 | 0.748   | 0.455 | -0.058 | 0.129    |          |
| 43 | int1 | ~  | male   | o1    | -0.043 | 0.028 | -1.522  | 0.128 | -0.099 | 0.012    |          |
| 44 | int1 | ~  | edu    | p1    | 0.010  | 0.036 | 0.270   | 0.787 | -0.060 | 0.080    |          |
| 45 | int1 | ~  | inc    | q1    | 0.007  | 0.034 | 0.205   | 0.838 | -0.060 | 0.075    |          |
| 46 | int1 | ~  | imm    | r1    | -0.017 | 0.038 | -0.442  | 0.658 | -0.092 | 0.058    |          |
| 47 | int1 | ~  | part   | s1    | -0.017 | 0.030 | -0.578  | 0.564 | -0.077 | 0.042    |          |
| 48 | int1 | ~  | kids   | t1    | 0.010  | 0.033 | 0.297   | 0.766 | -0.056 | 0.075    |          |
| 49 | ATT  | ~  | CCB    | b2    | -0.143 | 0.021 | -6.880  | 0.000 | -0.184 | -0.102   |          |
| 50 | ATT  | ~  | SKV    | c2    | -0.211 | 0.026 | -7.977  | 0.000 | -0.263 | -0.159   |          |
| 51 | ATT  | ~  | SKD    | d2    | -0.026 | 0.021 | -1.229  | 0.219 | -0.068 | 0.016    |          |
| 52 | ATT  | ~  | FCV    | e2    | 0.262  | 0.020 | 12.929  | 0.000 | 0.222  | 0.302    |          |
| 53 | ATT  | ~  | TPO    | f2    | 0.015  | 0.021 | 0.747   | 0.455 | -0.025 | 0.056    |          |
| 54 | ATT  | ~  | TSC    | g2    | 0.337  | 0.031 | 10.895  | 0.000 | 0.276  | 0.398    |          |
| 55 | ATT  | ~  | health | h2    | -0.016 | 0.017 | -0.968  | 0.333 | -0.050 | 0.017    |          |
| 56 | ATT  | ~  | risk2  | i2    | 0.010  | 0.030 | 0.337   | 0.736 | -0.049 | 0.069    |          |
| 57 | ATT  | ~  | risk3  | j2    | 0.063  | 0.044 | 1.426   | 0.154 | -0.024 | 0.151    |          |

|     |        |   |        |    |        |       |         |       |        |        |
|-----|--------|---|--------|----|--------|-------|---------|-------|--------|--------|
| 58  | ATT    | ~ | rel    | k2 | -0.007 | 0.007 | -0.959  | 0.338 | -0.021 | 0.007  |
| 59  | ATT    | ~ | pol    | l2 | 0.009  | 0.007 | 1.204   | 0.229 | -0.005 | 0.023  |
| 60  | ATT    | ~ | age2   | m2 | 0.132  | 0.036 | 3.651   | 0.000 | 0.061  | 0.203  |
| 61  | ATT    | ~ | age3   | n2 | 0.220  | 0.046 | 4.817   | 0.000 | 0.131  | 0.310  |
| 62  | ATT    | ~ | male   | o2 | 0.144  | 0.026 | 5.470   | 0.000 | 0.092  | 0.196  |
| 63  | ATT    | ~ | edu    | p2 | 0.059  | 0.029 | 2.014   | 0.044 | 0.002  | 0.116  |
| 64  | ATT    | ~ | inc    | q2 | 0.037  | 0.030 | 1.234   | 0.217 | -0.022 | 0.095  |
| 65  | ATT    | ~ | imm    | r2 | -0.089 | 0.035 | -2.571  | 0.010 | -0.156 | -0.021 |
| 66  | ATT    | ~ | part   | s2 | -0.007 | 0.029 | -0.225  | 0.822 | -0.064 | 0.050  |
| 67  | ATT    | ~ | kids   | t2 | -0.060 | 0.031 | -1.907  | 0.057 | -0.121 | 0.002  |
| 68  | att1   | ~ | att1   |    | 0.097  | 0.009 | 11.154  | 0.000 | 0.080  | 0.114  |
| 69  | att3   | ~ | att3   |    | 0.136  | 0.010 | 12.995  | 0.000 | 0.116  | 0.157  |
| 70  | ccb1   | ~ | ccb1   |    | 0.424  | 0.021 | 19.936  | 0.000 | 0.383  | 0.466  |
| 71  | ccb2   | ~ | ccb2   |    | 0.523  | 0.020 | 26.211  | 0.000 | 0.484  | 0.563  |
| 72  | ccb3   | ~ | ccb3   |    | 0.334  | 0.021 | 15.665  | 0.000 | 0.292  | 0.376  |
| 73  | ccb4   | ~ | ccb4   |    | 0.439  | 0.026 | 16.944  | 0.000 | 0.388  | 0.489  |
| 74  | ccb5   | ~ | ccb5   |    | 0.287  | 0.020 | 14.513  | 0.000 | 0.248  | 0.325  |
| 75  | ccb6   | ~ | ccb6   |    | 0.279  | 0.015 | 18.607  | 0.000 | 0.249  | 0.308  |
| 76  | ccb7   | ~ | ccb7   |    | 0.328  | 0.018 | 17.771  | 0.000 | 0.292  | 0.365  |
| 77  | ccb8   | ~ | ccb8   |    | 0.265  | 0.017 | 15.318  | 0.000 | 0.231  | 0.299  |
| 78  | skv1   | ~ | skv1   |    | 0.315  | 0.016 | 19.891  | 0.000 | 0.284  | 0.346  |
| 79  | skv2   | ~ | skv2   |    | 0.177  | 0.010 | 17.915  | 0.000 | 0.158  | 0.196  |
| 80  | skv3   | ~ | skv3   |    | 0.118  | 0.009 | 12.829  | 0.000 | 0.100  | 0.136  |
| 81  | skd1   | ~ | skd1   |    | 0.473  | 0.025 | 18.723  | 0.000 | 0.423  | 0.522  |
| 82  | skd2   | ~ | skd2   |    | 0.417  | 0.026 | 15.938  | 0.000 | 0.366  | 0.468  |
| 83  | fcv1   | ~ | fcv1   |    | 0.322  | 0.023 | 14.082  | 0.000 | 0.277  | 0.367  |
| 84  | fcv2   | ~ | fcv2   |    | 0.264  | 0.017 | 15.649  | 0.000 | 0.231  | 0.297  |
| 85  | fcv3   | ~ | fcv3   |    | 0.491  | 0.016 | 30.480  | 0.000 | 0.460  | 0.523  |
| 86  | tpo1   | ~ | tpo1   |    | 0.073  | 0.005 | 14.370  | 0.000 | 0.063  | 0.083  |
| 87  | tpo2   | ~ | tpo2   |    | 0.070  | 0.005 | 13.871  | 0.000 | 0.060  | 0.080  |
| 88  | tpo3   | ~ | tpo3   |    | 0.213  | 0.011 | 19.642  | 0.000 | 0.192  | 0.234  |
| 89  | tpo4   | ~ | tpo4   |    | 0.359  | 0.014 | 25.792  | 0.000 | 0.332  | 0.387  |
| 90  | tpo5   | ~ | tpo5   |    | 0.183  | 0.008 | 23.753  | 0.000 | 0.167  | 0.198  |
| 91  | tpo6   | ~ | tpo6   |    | 0.303  | 0.013 | 22.696  | 0.000 | 0.277  | 0.330  |
| 92  | tsc1   | ~ | tsc1   |    | 0.329  | 0.015 | 21.589  | 0.000 | 0.299  | 0.359  |
| 93  | tsc2   | ~ | tsc2   |    | 0.226  | 0.012 | 19.071  | 0.000 | 0.203  | 0.250  |
| 94  | tsc3   | ~ | tsc3   |    | 0.223  | 0.012 | 18.839  | 0.000 | 0.200  | 0.246  |
| 95  | tsc4   | ~ | tsc4   |    | 0.396  | 0.016 | 24.246  | 0.000 | 0.364  | 0.428  |
| 96  | int1   | ~ | int1   |    | 0.536  | 0.019 | 27.697  | 0.000 | 0.498  | 0.574  |
| 97  | ATT    | ~ | ATT    |    | 0.380  | 0.014 | 26.309  | 0.000 | 0.352  | 0.408  |
| 98  | CCB    | ~ | CCB    |    | 1.000  | 0.000 | NA      | NA    | 1.000  | 1.000  |
| 99  | SKV    | ~ | SKV    |    | 1.000  | 0.000 | NA      | NA    | 1.000  | 1.000  |
| 100 | SKD    | ~ | SKD    |    | 1.000  | 0.000 | NA      | NA    | 1.000  | 1.000  |
| 101 | FCV    | ~ | FCV    |    | 1.000  | 0.000 | NA      | NA    | 1.000  | 1.000  |
| 102 | TPO    | ~ | TPO    |    | 1.000  | 0.000 | NA      | NA    | 1.000  | 1.000  |
| 103 | TSC    | ~ | TSC    |    | 1.000  | 0.000 | NA      | NA    | 1.000  | 1.000  |
| 104 | CCB    | ~ | SKV    |    | 0.575  | 0.015 | 38.117  | 0.000 | 0.545  | 0.604  |
| 105 | CCB    | ~ | SKD    |    | 0.432  | 0.019 | 22.281  | 0.000 | 0.394  | 0.470  |
| 106 | CCB    | ~ | FCV    |    | -0.285 | 0.023 | -12.208 | 0.000 | -0.331 | -0.240 |
| 107 | CCB    | ~ | TPO    |    | -0.371 | 0.021 | -17.494 | 0.000 | -0.412 | -0.329 |
| 108 | CCB    | ~ | TSC    |    | -0.533 | 0.019 | -27.499 | 0.000 | -0.571 | -0.495 |
| 109 | SKV    | ~ | SKD    |    | 0.542  | 0.020 | 26.963  | 0.000 | 0.503  | 0.582  |
| 110 | SKV    | ~ | FCV    |    | -0.284 | 0.022 | -13.046 | 0.000 | -0.327 | -0.241 |
| 111 | SKV    | ~ | TPO    |    | -0.557 | 0.015 | -37.110 | 0.000 | -0.586 | -0.527 |
| 112 | SKV    | ~ | TSC    |    | -0.664 | 0.014 | -47.742 | 0.000 | -0.691 | -0.636 |
| 113 | SKD    | ~ | FCV    |    | -0.376 | 0.023 | -15.999 | 0.000 | -0.422 | -0.330 |
| 114 | SKD    | ~ | TPO    |    | -0.357 | 0.021 | -17.182 | 0.000 | -0.397 | -0.316 |
| 115 | SKD    | ~ | TSC    |    | -0.468 | 0.020 | -23.298 | 0.000 | -0.508 | -0.429 |
| 116 | FCV    | ~ | TPO    |    | 0.369  | 0.018 | 19.959  | 0.000 | 0.333  | 0.405  |
| 117 | FCV    | ~ | TSC    |    | 0.463  | 0.020 | 23.460  | 0.000 | 0.425  | 0.502  |
| 118 | TPO    | ~ | TSC    |    | 0.734  | 0.010 | 72.424  | 0.000 | 0.714  | 0.754  |
| 119 | health | ~ | health |    | 0.856  | 0.000 | NA      | NA    | 0.856  | 0.856  |
| 120 | health | ~ | risk2  |    | -0.070 | 0.000 | NA      | NA    | -0.070 | -0.070 |
| 121 | health | ~ | risk3  |    | -0.130 | 0.000 | NA      | NA    | -0.130 | -0.130 |
| 122 | health | ~ | rel    |    | 0.012  | 0.000 | NA      | NA    | 0.012  | 0.012  |
| 123 | health | ~ | pol    |    | -0.050 | 0.000 | NA      | NA    | -0.050 | -0.050 |
| 124 | health | ~ | age2   |    | 0.013  | 0.000 | NA      | NA    | 0.013  | 0.013  |
| 125 | health | ~ | age3   |    | -0.070 | 0.000 | NA      | NA    | -0.070 | -0.070 |
| 126 | health | ~ | male   |    | -0.022 | 0.000 | NA      | NA    | -0.022 | -0.022 |
| 127 | health | ~ | edu    |    | 0.067  | 0.000 | NA      | NA    | 0.067  | 0.067  |
| 128 | health | ~ | inc    |    | 0.066  | 0.000 | NA      | NA    | 0.066  | 0.066  |
| 129 | health | ~ | imm    |    | 0.023  | 0.000 | NA      | NA    | 0.023  | 0.023  |
| 130 | health | ~ | part   |    | 0.012  | 0.000 | NA      | NA    | 0.012  | 0.012  |
| 131 | health | ~ | kids   |    | 0.032  | 0.000 | NA      | NA    | 0.032  | 0.032  |
| 132 | risk2  | ~ | risk2  |    | 0.214  | 0.000 | NA      | NA    | 0.214  | 0.214  |

|     |       |    |       |        |       |    |    |        |        |
|-----|-------|----|-------|--------|-------|----|----|--------|--------|
| 133 | risk2 | ~~ | risk3 | -0.048 | 0.000 | NA | NA | -0.048 | -0.048 |
| 134 | risk2 | ~~ | rel   | 0.031  | 0.000 | NA | NA | 0.031  | 0.031  |
| 135 | risk2 | ~~ | pol   | 0.009  | 0.000 | NA | NA | 0.009  | 0.009  |
| 136 | risk2 | ~~ | age2  | -0.002 | 0.000 | NA | NA | -0.002 | -0.002 |
| 137 | risk2 | ~~ | age3  | 0.027  | 0.000 | NA | NA | 0.027  | 0.027  |
| 138 | risk2 | ~~ | male  | 0.011  | 0.000 | NA | NA | 0.011  | 0.011  |
| 139 | risk2 | ~~ | edu   | -0.010 | 0.000 | NA | NA | -0.010 | -0.010 |
| 140 | risk2 | ~~ | inc   | -0.009 | 0.000 | NA | NA | -0.009 | -0.009 |
| 141 | risk2 | ~~ | imm   | -0.005 | 0.000 | NA | NA | -0.005 | -0.005 |
| 142 | risk2 | ~~ | part  | 0.017  | 0.000 | NA | NA | 0.017  | 0.017  |
| 143 | risk2 | ~~ | kids  | -0.006 | 0.000 | NA | NA | -0.006 | -0.006 |
| 144 | risk3 | ~~ | risk3 | 0.130  | 0.000 | NA | NA | 0.130  | 0.130  |
| 145 | risk3 | ~~ | rel   | 0.027  | 0.000 | NA | NA | 0.027  | 0.027  |
| 146 | risk3 | ~~ | pol   | 0.001  | 0.000 | NA | NA | 0.001  | 0.001  |
| 147 | risk3 | ~~ | age2  | -0.010 | 0.000 | NA | NA | -0.010 | -0.010 |
| 148 | risk3 | ~~ | age3  | 0.026  | 0.000 | NA | NA | 0.026  | 0.026  |
| 149 | risk3 | ~~ | male  | 0.003  | 0.000 | NA | NA | 0.003  | 0.003  |
| 150 | risk3 | ~~ | edu   | -0.011 | 0.000 | NA | NA | -0.011 | -0.011 |
| 151 | risk3 | ~~ | inc   | -0.013 | 0.000 | NA | NA | -0.013 | -0.013 |
| 152 | risk3 | ~~ | imm   | -0.001 | 0.000 | NA | NA | -0.001 | -0.001 |
| 153 | risk3 | ~~ | part  | -0.003 | 0.000 | NA | NA | -0.003 | -0.003 |
| 154 | risk3 | ~~ | kids  | -0.006 | 0.000 | NA | NA | -0.006 | -0.006 |
| 155 | rel   | ~~ | rel   | 3.487  | 0.000 | NA | NA | 3.487  | 3.487  |
| 156 | rel   | ~~ | pol   | 0.175  | 0.000 | NA | NA | 0.175  | 0.175  |
| 157 | rel   | ~~ | age2  | 0.004  | 0.000 | NA | NA | 0.004  | 0.004  |
| 158 | rel   | ~~ | age3  | 0.013  | 0.000 | NA | NA | 0.013  | 0.013  |
| 159 | rel   | ~~ | male  | -0.033 | 0.000 | NA | NA | -0.033 | -0.033 |
| 160 | rel   | ~~ | edu   | 0.007  | 0.000 | NA | NA | 0.007  | 0.007  |
| 161 | rel   | ~~ | inc   | -0.022 | 0.000 | NA | NA | -0.022 | -0.022 |
| 162 | rel   | ~~ | imm   | 0.084  | 0.000 | NA | NA | 0.084  | 0.084  |
| 163 | rel   | ~~ | part  | 0.037  | 0.000 | NA | NA | 0.037  | 0.037  |
| 164 | rel   | ~~ | kids  | 0.046  | 0.000 | NA | NA | 0.046  | 0.046  |
| 165 | pol   | ~~ | pol   | 3.741  | 0.000 | NA | NA | 3.741  | 3.741  |
| 166 | pol   | ~~ | age2  | 0.080  | 0.000 | NA | NA | 0.080  | 0.080  |
| 167 | pol   | ~~ | age3  | -0.012 | 0.000 | NA | NA | -0.012 | -0.012 |
| 168 | pol   | ~~ | male  | 0.082  | 0.000 | NA | NA | 0.082  | 0.082  |
| 169 | pol   | ~~ | edu   | -0.026 | 0.000 | NA | NA | -0.026 | -0.026 |
| 170 | pol   | ~~ | inc   | 0.013  | 0.000 | NA | NA | 0.013  | 0.013  |
| 171 | pol   | ~~ | imm   | -0.048 | 0.000 | NA | NA | -0.048 | -0.048 |
| 172 | pol   | ~~ | part  | 0.063  | 0.000 | NA | NA | 0.063  | 0.063  |
| 173 | pol   | ~~ | kids  | 0.046  | 0.000 | NA | NA | 0.046  | 0.046  |
| 174 | age2  | ~~ | age2  | 0.237  | 0.000 | NA | NA | 0.237  | 0.237  |
| 175 | age2  | ~~ | age3  | -0.117 | 0.000 | NA | NA | -0.117 | -0.117 |
| 176 | age2  | ~~ | male  | 0.012  | 0.000 | NA | NA | 0.012  | 0.012  |
| 177 | age2  | ~~ | edu   | 0.017  | 0.000 | NA | NA | 0.017  | 0.017  |
| 178 | age2  | ~~ | inc   | 0.027  | 0.000 | NA | NA | 0.027  | 0.027  |
| 179 | age2  | ~~ | imm   | 0.001  | 0.000 | NA | NA | 0.001  | 0.001  |
| 180 | age2  | ~~ | part  | 0.048  | 0.000 | NA | NA | 0.048  | 0.048  |
| 181 | age2  | ~~ | kids  | 0.063  | 0.000 | NA | NA | 0.063  | 0.063  |
| 182 | age3  | ~~ | age3  | 0.155  | 0.000 | NA | NA | 0.155  | 0.155  |
| 183 | age3  | ~~ | male  | 0.030  | 0.000 | NA | NA | 0.030  | 0.030  |
| 184 | age3  | ~~ | edu   | -0.017 | 0.000 | NA | NA | -0.017 | -0.017 |
| 185 | age3  | ~~ | inc   | -0.016 | 0.000 | NA | NA | -0.016 | -0.016 |
| 186 | age3  | ~~ | imm   | -0.010 | 0.000 | NA | NA | -0.010 | -0.010 |
| 187 | age3  | ~~ | part  | 0.010  | 0.000 | NA | NA | 0.010  | 0.010  |
| 188 | age3  | ~~ | kids  | -0.043 | 0.000 | NA | NA | -0.043 | -0.043 |
| 189 | male  | ~~ | male  | 0.250  | 0.000 | NA | NA | 0.250  | 0.250  |
| 190 | male  | ~~ | edu   | 0.001  | 0.000 | NA | NA | 0.001  | 0.001  |
| 191 | male  | ~~ | inc   | -0.003 | 0.000 | NA | NA | -0.003 | -0.003 |
| 192 | male  | ~~ | imm   | -0.007 | 0.000 | NA | NA | -0.007 | -0.007 |
| 193 | male  | ~~ | part  | 0.004  | 0.000 | NA | NA | 0.004  | 0.004  |
| 194 | male  | ~~ | kids  | -0.003 | 0.000 | NA | NA | -0.003 | -0.003 |
| 195 | edu   | ~~ | edu   | 0.179  | 0.000 | NA | NA | 0.179  | 0.179  |
| 196 | edu   | ~~ | inc   | 0.050  | 0.000 | NA | NA | 0.050  | 0.050  |
| 197 | edu   | ~~ | imm   | 0.021  | 0.000 | NA | NA | 0.021  | 0.021  |
| 198 | edu   | ~~ | part  | 0.016  | 0.000 | NA | NA | 0.016  | 0.016  |
| 199 | edu   | ~~ | kids  | 0.015  | 0.000 | NA | NA | 0.015  | 0.015  |
| 200 | inc   | ~~ | inc   | 0.191  | 0.000 | NA | NA | 0.191  | 0.191  |
| 201 | inc   | ~~ | imm   | -0.003 | 0.000 | NA | NA | -0.003 | -0.003 |
| 202 | inc   | ~~ | part  | 0.057  | 0.000 | NA | NA | 0.057  | 0.057  |
| 203 | inc   | ~~ | kids  | 0.029  | 0.000 | NA | NA | 0.029  | 0.029  |
| 204 | imm   | ~~ | imm   | 0.146  | 0.000 | NA | NA | 0.146  | 0.146  |
| 205 | imm   | ~~ | part  | -0.003 | 0.000 | NA | NA | -0.003 | -0.003 |
| 206 | imm   | ~~ | kids  | 0.000  | 0.000 | NA | NA | 0.000  | 0.000  |
| 207 | part  | ~~ | part  | 0.238  | 0.000 | NA | NA | 0.238  | 0.238  |

|     |        |    |                 |        |       |         |       |        |        |
|-----|--------|----|-----------------|--------|-------|---------|-------|--------|--------|
| 208 | part   | ~~ | kids            | 0.051  | 0.000 | NA      | NA    | 0.051  | 0.051  |
| 209 | kids   | ~~ | kids            | 0.189  | 0.000 | NA      | NA    | 0.189  | 0.189  |
| 210 | att1   | ~1 |                 | 2.456  | 0.086 | 28.479  | 0.000 | 2.287  | 2.625  |
| 211 | att3   | ~1 |                 | 2.213  | 0.082 | 26.910  | 0.000 | 2.052  | 2.375  |
| 212 | ccb1   | ~1 |                 | 1.238  | 0.011 | 108.159 | 0.000 | 1.216  | 1.261  |
| 213 | ccb2   | ~1 |                 | 1.319  | 0.012 | 108.460 | 0.000 | 1.296  | 1.343  |
| 214 | ccb3   | ~1 |                 | 1.361  | 0.017 | 81.424  | 0.000 | 1.328  | 1.394  |
| 215 | ccb4   | ~1 |                 | 1.343  | 0.027 | 49.019  | 0.000 | 1.289  | 1.396  |
| 216 | ccb5   | ~1 |                 | 1.227  | 0.017 | 73.208  | 0.000 | 1.194  | 1.260  |
| 217 | ccb6   | ~1 |                 | 1.250  | 0.012 | 107.102 | 0.000 | 1.227  | 1.273  |
| 218 | ccb7   | ~1 |                 | 1.202  | 0.010 | 115.351 | 0.000 | 1.182  | 1.223  |
| 219 | ccb8   | ~1 |                 | 1.237  | 0.015 | 83.025  | 0.000 | 1.207  | 1.266  |
| 220 | skv1   | ~1 |                 | 1.911  | 0.021 | 89.085  | 0.000 | 1.869  | 1.953  |
| 221 | skv2   | ~1 |                 | 2.150  | 0.025 | 84.716  | 0.000 | 2.100  | 2.200  |
| 222 | skv3   | ~1 |                 | 1.981  | 0.022 | 90.339  | 0.000 | 1.938  | 2.024  |
| 223 | skd1   | ~1 |                 | 2.303  | 0.031 | 75.485  | 0.000 | 2.243  | 2.363  |
| 224 | skd2   | ~1 |                 | 2.642  | 0.036 | 72.836  | 0.000 | 2.571  | 2.713  |
| 225 | fcv1   | ~1 |                 | 2.448  | 0.035 | 70.145  | 0.000 | 2.380  | 2.516  |
| 226 | fcv2   | ~1 |                 | 2.877  | 0.048 | 59.839  | 0.000 | 2.783  | 2.972  |
| 227 | fcv3   | ~1 |                 | 1.906  | 0.022 | 85.761  | 0.000 | 1.862  | 1.949  |
| 228 | tpo1   | ~1 |                 | 1.824  | 0.022 | 83.445  | 0.000 | 1.781  | 1.867  |
| 229 | tpo2   | ~1 |                 | 1.872  | 0.023 | 83.112  | 0.000 | 1.827  | 1.916  |
| 230 | tpo3   | ~1 |                 | 1.916  | 0.024 | 81.323  | 0.000 | 1.870  | 1.962  |
| 231 | tpo4   | ~1 |                 | 2.161  | 0.029 | 75.123  | 0.000 | 2.104  | 2.217  |
| 232 | tpo5   | ~1 |                 | 1.740  | 0.019 | 90.637  | 0.000 | 1.702  | 1.777  |
| 233 | tpo6   | ~1 |                 | 1.777  | 0.020 | 89.137  | 0.000 | 1.738  | 1.816  |
| 234 | tsc1   | ~1 |                 | 3.294  | 0.057 | 57.736  | 0.000 | 3.183  | 3.406  |
| 235 | tsc2   | ~1 |                 | 2.853  | 0.046 | 62.438  | 0.000 | 2.763  | 2.942  |
| 236 | tsc3   | ~1 |                 | 2.293  | 0.034 | 66.987  | 0.000 | 2.226  | 2.360  |
| 237 | tsc4   | ~1 |                 | 2.616  | 0.039 | 66.316  | 0.000 | 2.539  | 2.694  |
| 238 | int1   | ~1 |                 | 1.866  | 0.100 | 18.656  | 0.000 | 1.670  | 2.062  |
| 239 | health | ~1 |                 | 3.431  | 0.000 | NA      | NA    | 3.431  | 3.431  |
| 240 | risk2  | ~1 |                 | 0.311  | 0.000 | NA      | NA    | 0.311  | 0.311  |
| 241 | risk3  | ~1 |                 | 0.153  | 0.000 | NA      | NA    | 0.153  | 0.153  |
| 242 | rel    | ~1 |                 | 2.622  | 0.000 | NA      | NA    | 2.622  | 2.622  |
| 243 | pol    | ~1 |                 | 4.859  | 0.000 | NA      | NA    | 4.859  | 4.859  |
| 244 | age2   | ~1 |                 | 0.612  | 0.000 | NA      | NA    | 0.612  | 0.612  |
| 245 | age3   | ~1 |                 | 0.191  | 0.000 | NA      | NA    | 0.191  | 0.191  |
| 246 | male   | ~1 |                 | 0.512  | 0.000 | NA      | NA    | 0.512  | 0.512  |
| 247 | edu    | ~1 |                 | 0.234  | 0.000 | NA      | NA    | 0.234  | 0.234  |
| 248 | inc    | ~1 |                 | 0.258  | 0.000 | NA      | NA    | 0.258  | 0.258  |
| 249 | imm    | ~1 |                 | 0.177  | 0.000 | NA      | NA    | 0.177  | 0.177  |
| 250 | part   | ~1 |                 | 0.611  | 0.000 | NA      | NA    | 0.611  | 0.611  |
| 251 | kids   | ~1 |                 | 0.252  | 0.000 | NA      | NA    | 0.252  | 0.252  |
| 252 | ATT    | ~1 |                 | 0.000  | 0.000 | NA      | NA    | 0.000  | 0.000  |
| 253 | CCB    | ~1 |                 | 0.000  | 0.000 | NA      | NA    | 0.000  | 0.000  |
| 254 | SKV    | ~1 |                 | 0.000  | 0.000 | NA      | NA    | 0.000  | 0.000  |
| 255 | SKD    | ~1 |                 | 0.000  | 0.000 | NA      | NA    | 0.000  | 0.000  |
| 256 | FCV    | ~1 |                 | 0.000  | 0.000 | NA      | NA    | 0.000  | 0.000  |
| 257 | TPO    | ~1 |                 | 0.000  | 0.000 | NA      | NA    | 0.000  | 0.000  |
| 258 | TSC    | ~1 |                 | 0.000  | 0.000 | NA      | NA    | 0.000  | 0.000  |
| 259 | i_ccb  | := | a*b2 i_ccb      | -0.101 | 0.015 | -6.641  | 0.000 | -0.131 | -0.071 |
| 260 | i_skv  | := | a*c2 i_skv      | -0.149 | 0.019 | -7.702  | 0.000 | -0.187 | -0.111 |
| 261 | i_skd  | := | a*d2 i_skd      | -0.018 | 0.015 | -1.223  | 0.221 | -0.048 | 0.011  |
| 262 | i_fcv  | := | a*e2 i_fcv      | 0.186  | 0.016 | 11.783  | 0.000 | 0.155  | 0.217  |
| 263 | i_tpo  | := | a*f2 i_tpo      | 0.011  | 0.015 | 0.747   | 0.455 | -0.018 | 0.040  |
| 264 | i_tsc  | := | a*g2 i_tsc      | 0.239  | 0.024 | 10.083  | 0.000 | 0.192  | 0.285  |
| 265 | i_heal | := | a*h2 i_heal     | -0.012 | 0.012 | -0.967  | 0.333 | -0.035 | 0.012  |
| 266 | i_ri2  | := | a*i2 i_ri2      | 0.007  | 0.021 | 0.337   | 0.736 | -0.035 | 0.049  |
| 267 | i_ri3  | := | a*j2 i_ri3      | 0.045  | 0.032 | 1.420   | 0.156 | -0.017 | 0.107  |
| 268 | i_rel  | := | a*k2 i_rel      | -0.005 | 0.005 | -0.960  | 0.337 | -0.015 | 0.005  |
| 269 | i_pol  | := | a*l2 i_pol      | 0.006  | 0.005 | 1.200   | 0.230 | -0.004 | 0.016  |
| 270 | i_ag2  | := | a*m2 i_ag2      | 0.094  | 0.026 | 3.615   | 0.000 | 0.043  | 0.144  |
| 271 | i_ag3  | := | a*n2 i_ag3      | 0.156  | 0.033 | 4.754   | 0.000 | 0.092  | 0.220  |
| 272 | i_mal  | := | a*o2 i_mal      | 0.102  | 0.019 | 5.373   | 0.000 | 0.065  | 0.139  |
| 273 | i_edu  | := | a*p2 i_edu      | 0.042  | 0.021 | 2.015   | 0.044 | 0.001  | 0.082  |
| 274 | i_inc  | := | a*q2 i_inc      | 0.026  | 0.021 | 1.231   | 0.218 | -0.015 | 0.068  |
| 275 | i_imm  | := | a*r2 i_imm      | -0.063 | 0.024 | -2.568  | 0.010 | -0.111 | -0.015 |
| 276 | i_par  | := | a*s2 i_par      | -0.005 | 0.021 | -0.225  | 0.822 | -0.045 | 0.036  |
| 277 | i_kid  | := | a*t2 i_kid      | -0.042 | 0.022 | -1.904  | 0.057 | -0.086 | 0.001  |
| 278 | t_ccb  | := | (a*b2)+b1 t_ccb | -0.071 | 0.022 | -3.265  | 0.001 | -0.114 | -0.028 |
| 279 | t_skv  | := | (a*c2)+c1 t_skv | -0.158 | 0.029 | -5.530  | 0.000 | -0.214 | -0.102 |
| 280 | t_skd  | := | (a*d2)+d1 t_skd | -0.007 | 0.026 | -0.254  | 0.800 | -0.057 | 0.044  |
| 281 | t_fcv  | := | (a*e2)+e1 t_fcv | 0.199  | 0.023 | 8.758   | 0.000 | 0.154  | 0.243  |
| 282 | t_tpo  | := | (a*f2)+f1 t_tpo | 0.022  | 0.026 | 0.826   | 0.409 | -0.030 | 0.073  |

|     |                    |       |        |       |        |       |        |       |
|-----|--------------------|-------|--------|-------|--------|-------|--------|-------|
| 283 | t_tsc := (a*g2)+g1 | t_tsc | 0.204  | 0.034 | 6.003  | 0.000 | 0.138  | 0.271 |
| 284 | t_hea := (a*h2)+h1 | t_hea | -0.006 | 0.020 | -0.305 | 0.760 | -0.046 | 0.034 |
| 285 | t_ri2 := (a*i2)+i1 | t_ri2 | 0.006  | 0.038 | 0.157  | 0.875 | -0.068 | 0.080 |
| 286 | t_ri3 := (a*j2)+j1 | t_ri3 | -0.013 | 0.056 | -0.237 | 0.813 | -0.122 | 0.096 |
| 287 | t_rel := (a*k2)+k1 | t_rel | -0.005 | 0.008 | -0.644 | 0.520 | -0.022 | 0.011 |
| 288 | t_pol := (a*l2)+l1 | t_pol | 0.010  | 0.008 | 1.185  | 0.236 | -0.006 | 0.026 |
| 289 | t_ag2 := (a*m2)+m1 | t_ag2 | 0.076  | 0.042 | 1.800  | 0.072 | -0.007 | 0.159 |
| 290 | t_ag3 := (a*n2)+n1 | t_ag3 | 0.192  | 0.055 | 3.491  | 0.000 | 0.084  | 0.299 |
| 291 | t_ma1 := (a*o2)+o1 | t_ma1 | 0.059  | 0.032 | 1.823  | 0.068 | -0.004 | 0.123 |
| 292 | t_edu := (a*p2)+p1 | t_edu | 0.051  | 0.039 | 1.309  | 0.190 | -0.025 | 0.128 |
| 293 | t_inc := (a*q2)+q1 | t_inc | 0.033  | 0.039 | 0.858  | 0.391 | -0.043 | 0.109 |
| 294 | t_imm := (a*r2)+r1 | t_imm | -0.080 | 0.043 | -1.878 | 0.060 | -0.163 | 0.003 |
| 295 | t_par := (a*s2)+s1 | t_par | -0.022 | 0.035 | -0.626 | 0.531 | -0.091 | 0.047 |
| 296 | t_kid := (a*t2)+t1 | t_kid | -0.033 | 0.038 | -0.852 | 0.394 | -0.107 | 0.042 |

“Defined Parameters” (pp. 33-34) are the indirect and total effects of the background factors on vaccination intentions mediated via attitudes toward getting vaccinated. Prefixes “i\_” and “t\_” refer to indirect and total effects, respectively.

## A10. Robustness analysis “Model 3”, WLSMV estimator.

```

> # WLSMV (for robustness)
> f3.1 <- sem(m3,data=tpb_data,ordered = c("int1"),estimator="WLSMV")
> summary(f3.1,standardized=TRUE,fit.measures=TRUE,rsquare=TRUE)
lavaan 0.6-9 ended normally after 109 iterations

Estimator                      DWLS
Optimization method             NLMINB
Number of model parameters      144

Number of observations          Used      Total
                                2537      3532

Model Test User Model:

Test Statistic                  Standard      Robust
Degrees of freedom              6558.081    4212.034
P-value (Chi-square)           701         701
Scaling correction factor       0.000       0.000
Shift parameter                 1.753
    simple second-order correction 471.565

Model Test Baseline Model:

Test statistic                   104908.849  15452.338
Degrees of freedom               406         406
P-value                          0.000       0.000
Scaling correction factor        6.945

User Model versus Baseline Model:

Comparative Fit Index (CFI)     0.944       0.767
Tucker-Lewis Index (TLI)       0.968       0.865

Robust Comparative Fit Index (CFI)      NA
Robust Tucker-Lewis Index (TLI)        NA

Root Mean Square Error of Approximation:

RMSEA                           0.057       0.044
90 Percent confidence interval - lower 0.056       0.043
90 Percent confidence interval - upper 0.059       0.046
P-value RMSEA <= 0.05           0.000       1.000

Robust RMSEA                     NA
90 Percent confidence interval - lower NA
90 Percent confidence interval - upper NA

Standardized Root Mean Square Residual:

SRMR                             0.046       0.046

Parameter Estimates:

Standard errors                   Robust.sem
Information                       Expected
Information saturated (h1) model  Unstructured

Latent Variables:

Estimate  Std.Err  z-value  P(>|z|)  Std.lv  Std.all
ATT =~
  att1    1.000
  att3    1.031    0.027   37.538   0.000   1.862   0.946
CCB =~
  ccb1    1.000
  ccb2    0.799    0.029   27.226   0.000   1.920   0.930
  ccb3    1.000
  ccb4    0.730    0.023   31.554   0.000   1.263   0.876
  ccb5    0.799    0.029   27.226   0.000   1.009   0.649
  ccb6    0.730    0.023   31.554   0.000   0.922   0.754
  ccb7    0.478    0.016   29.142   0.000   0.604   0.584
  ccb8    0.738    0.021   34.559   0.000   0.932   0.769
SKV =~
  skv1    1.015    0.032   32.195   0.000   1.282   0.865
  skv1    1.081    0.032   33.427   0.000   1.366   0.897
  skv1    0.813    0.022   36.793   0.000   1.027   0.810
  skv1    1.000
  skv1    1.000
  skv1    1.335    0.844

```



|              |          |         |         |         |        |         |
|--------------|----------|---------|---------|---------|--------|---------|
| skv2         | 1.113    | 0.031   | 35.969  | 0.000   | 1.486  | 0.862   |
| skv3         | 1.191    | 0.031   | 38.907  | 0.000   | 1.590  | 0.939   |
| SKD =~       |          |         |         |         |        |         |
| skd1         | 1.000    |         |         |         | 1.122  | 0.729   |
| skd2         | 1.053    | 0.048   | 21.940  | 0.000   | 1.182  | 0.753   |
| FCV =~       |          |         |         |         |        |         |
| fcv1         | 1.000    |         |         |         | 1.283  | 0.741   |
| fcv2         | 1.274    | 0.054   | 23.787  | 0.000   | 1.634  | 0.979   |
| fcv3         | 0.841    | 0.044   | 18.935  | 0.000   | 1.079  | 0.611   |
| TPO =~       |          |         |         |         |        |         |
| tpo1         | 1.000    |         |         |         | 1.701  | 0.944   |
| tpo2         | 0.969    | 0.018   | 55.206  | 0.000   | 1.648  | 0.940   |
| tpo3         | 0.964    | 0.025   | 39.216  | 0.000   | 1.640  | 0.909   |
| tpo4         | 0.866    | 0.027   | 31.495  | 0.000   | 1.473  | 0.867   |
| tpo5         | 0.813    | 0.021   | 39.366  | 0.000   | 1.382  | 0.841   |
| tpo6         | 0.807    | 0.024   | 33.788  | 0.000   | 1.372  | 0.811   |
| TSC =~       |          |         |         |         |        |         |
| tsc1         | 1.000    |         |         |         | 1.185  | 0.810   |
| tsc2         | 1.168    | 0.030   | 38.634  | 0.000   | 1.385  | 0.863   |
| tsc3         | 1.423    | 0.044   | 32.686  | 0.000   | 1.686  | 0.900   |
| tsc4         | 1.038    | 0.030   | 34.180  | 0.000   | 1.231  | 0.747   |
| Regressions: |          |         |         |         |        |         |
|              | Estimate | Std.Err | z-value | P(> z ) | Std.lv | Std.all |
| intl ~       |          |         |         |         |        |         |
| ATT (a)      | 0.350    | 0.014   | 24.327  | 0.000   | 0.651  | 0.634   |
| CCB (b1)     | 0.018    | 0.016   | 1.116   | 0.265   | 0.023  | 0.023   |
| SKV (c1)     | -0.040   | 0.018   | -2.183  | 0.029   | -0.054 | -0.052  |
| SKD (d1)     | 0.003    | 0.022   | 0.141   | 0.888   | 0.003  | 0.003   |
| FCV (e1)     | 0.029    | 0.016   | 1.770   | 0.077   | 0.037  | 0.036   |
| TPO (f1)     | 0.006    | 0.015   | 0.402   | 0.688   | 0.010  | 0.010   |
| TSC (g1)     | 0.008    | 0.026   | 0.312   | 0.755   | 0.010  | 0.009   |
| health (h1)  | 0.009    | 0.022   | 0.427   | 0.670   | 0.009  | 0.008   |
| risk2 (i1)   | 0.043    | 0.044   | 0.986   | 0.324   | 0.043  | 0.019   |
| risk3 (j1)   | -0.033   | 0.061   | -0.548  | 0.583   | -0.033 | -0.012  |
| rel (k1)     | -0.001   | 0.009   | -0.118  | 0.906   | -0.001 | -0.002  |
| pol (l1)     | -0.002   | 0.009   | -0.188  | 0.851   | -0.002 | -0.003  |
| age2 (m1)    | 0.047    | 0.053   | 0.886   | 0.376   | 0.047  | 0.022   |
| age3 (n1)    | 0.131    | 0.066   | 1.990   | 0.047   | 0.131  | 0.050   |
| male (o1)    | -0.054   | 0.037   | -1.459  | 0.145   | -0.054 | -0.026  |
| edu (p1)     | 0.020    | 0.048   | 0.418   | 0.676   | 0.020  | 0.008   |
| inc (q1)     | 0.052    | 0.044   | 1.172   | 0.241   | 0.052  | 0.022   |
| imm (r1)     | -0.005   | 0.049   | -0.093  | 0.926   | -0.005 | -0.002  |
| part (s1)    | -0.021   | 0.040   | -0.537  | 0.591   | -0.021 | -0.010  |
| kids (t1)    | -0.021   | 0.045   | -0.479  | 0.632   | -0.021 | -0.009  |
| ATT ~        |          |         |         |         |        |         |
| CCB (b2)     | -0.200   | 0.021   | -9.662  | 0.000   | -0.136 | -0.136  |
| SKV (c2)     | -0.265   | 0.028   | -9.388  | 0.000   | -0.190 | -0.190  |
| SKD (d2)     | -0.030   | 0.034   | -0.895  | 0.371   | -0.018 | -0.018  |
| FCV (e2)     | 0.358    | 0.026   | 13.905  | 0.000   | 0.247  | 0.247   |
| TPO (f2)     | -0.005   | 0.023   | -0.197  | 0.844   | -0.004 | -0.004  |
| TSC (g2)     | 0.547    | 0.038   | 14.568  | 0.000   | 0.348  | 0.348   |
| health (h2)  | 0.010    | 0.044   | 0.216   | 0.829   | 0.005  | 0.005   |
| risk2 (i2)   | 0.081    | 0.090   | 0.896   | 0.370   | 0.044  | 0.020   |
| risk3 (j2)   | 0.355    | 0.125   | 2.853   | 0.004   | 0.191  | 0.069   |
| rel (k2)     | -0.008   | 0.019   | -0.416  | 0.677   | -0.004 | -0.008  |
| pol (l2)     | -0.158   | 0.018   | -8.650  | 0.000   | -0.085 | -0.165  |
| age2 (m2)    | 0.380    | 0.102   | 3.716   | 0.000   | 0.204  | 0.099   |
| age3 (n2)    | 0.694    | 0.133   | 5.198   | 0.000   | 0.373  | 0.147   |
| male (o2)    | 0.296    | 0.075   | 3.929   | 0.000   | 0.159  | 0.079   |
| edu (p2)     | 0.656    | 0.098   | 6.716   | 0.000   | 0.353  | 0.153   |
| inc (q2)     | 0.303    | 0.092   | 3.306   | 0.001   | 0.163  | 0.073   |
| imm (r2)     | -0.283   | 0.098   | -2.897  | 0.004   | -0.152 | -0.057  |
| part (s2)    | 0.155    | 0.083   | 1.872   | 0.061   | 0.084  | 0.041   |
| kids (t2)    | -0.312   | 0.090   | -3.488  | 0.000   | -0.168 | -0.073  |
| Covariances: |          |         |         |         |        |         |
|              | Estimate | Std.Err | z-value | P(> z ) | Std.lv | Std.all |
| CCB ~~       |          |         |         |         |        |         |
| SKV          | 0.910    | 0.049   | 18.580  | 0.000   | 0.539  | 0.539   |
| SKD          | 0.595    | 0.042   | 14.207  | 0.000   | 0.420  | 0.420   |
| FCV          | -0.398   | 0.037   | -10.632 | 0.000   | -0.245 | -0.245  |
| TPO          | -0.656   | 0.048   | -13.623 | 0.000   | -0.306 | -0.306  |
| TSC          | -0.693   | 0.037   | -18.624 | 0.000   | -0.463 | -0.463  |
| SKV ~~       |          |         |         |         |        |         |

|        |        |       |         |       |        |        |
|--------|--------|-------|---------|-------|--------|--------|
| SKD    | 0.793  | 0.049 | 16.198  | 0.000 | 0.529  | 0.529  |
| FCV    | -0.429 | 0.041 | -10.381 | 0.000 | -0.251 | -0.251 |
| TPO    | -1.199 | 0.068 | -17.549 | 0.000 | -0.528 | -0.528 |
| TSC    | -1.007 | 0.049 | -20.388 | 0.000 | -0.636 | -0.636 |
| SKD ~~ |        |       |         |       |        |        |
| FCV    | -0.472 | 0.043 | -11.089 | 0.000 | -0.328 | -0.328 |
| TPO    | -0.634 | 0.053 | -11.907 | 0.000 | -0.332 | -0.332 |
| TSC    | -0.572 | 0.039 | -14.610 | 0.000 | -0.430 | -0.430 |
| FCV ~~ |        |       |         |       |        |        |
| TPO    | 0.785  | 0.063 | 12.527  | 0.000 | 0.360  | 0.360  |
| TSC    | 0.649  | 0.045 | 14.550  | 0.000 | 0.427  | 0.427  |
| TPO ~~ |        |       |         |       |        |        |
| TSC    | 1.462  | 0.074 | 19.857  | 0.000 | 0.725  | 0.725  |

Intercepts:

|       | Estimate | Std.Err | z-value | P(> z ) | Std.lv | Std.all |
|-------|----------|---------|---------|---------|--------|---------|
| .att1 | 5.396    | 0.219   | 24.678  | 0.000   | 5.396  | 2.743   |
| .att3 | 5.211    | 0.231   | 22.573  | 0.000   | 5.211  | 2.523   |
| .ccb1 | 1.428    | 0.170   | 8.384   | 0.000   | 1.428  | 0.990   |
| .ccb2 | 1.429    | 0.187   | 7.639   | 0.000   | 1.429  | 0.918   |
| .ccb3 | 1.654    | 0.138   | 11.987  | 0.000   | 1.654  | 1.352   |
| .ccb4 | 1.107    | 0.116   | 9.547   | 0.000   | 1.107  | 1.069   |
| .ccb5 | 1.339    | 0.145   | 9.258   | 0.000   | 1.339  | 1.105   |
| .ccb6 | 1.645    | 0.170   | 9.655   | 0.000   | 1.645  | 1.110   |
| .ccb7 | 1.397    | 0.181   | 7.704   | 0.000   | 1.397  | 0.918   |
| .ccb8 | 1.327    | 0.147   | 9.014   | 0.000   | 1.327  | 1.047   |
| .skv1 | 2.640    | 0.182   | 14.502  | 0.000   | 2.640  | 1.668   |
| .skv2 | 3.386    | 0.202   | 16.742  | 0.000   | 3.386  | 1.965   |
| .skv3 | 2.915    | 0.197   | 14.769  | 0.000   | 2.915  | 1.722   |
| .skd1 | 3.472    | 0.175   | 19.892  | 0.000   | 3.472  | 2.257   |
| .skd2 | 3.722    | 0.179   | 20.790  | 0.000   | 3.722  | 2.372   |
| .fcv1 | 5.209    | 0.194   | 26.792  | 0.000   | 5.209  | 3.010   |
| .fcv2 | 6.224    | 0.194   | 32.127  | 0.000   | 6.224  | 3.728   |
| .fcv3 | 4.236    | 0.199   | 21.327  | 0.000   | 4.236  | 2.398   |
| .tpo1 | 3.111    | 0.210   | 14.844  | 0.000   | 3.111  | 1.726   |
| .tpo2 | 2.987    | 0.203   | 14.737  | 0.000   | 2.987  | 1.704   |
| .tpo3 | 3.197    | 0.211   | 15.183  | 0.000   | 3.197  | 1.772   |
| .tpo4 | 3.304    | 0.194   | 17.045  | 0.000   | 3.304  | 1.946   |
| .tpo5 | 2.497    | 0.192   | 13.028  | 0.000   | 2.497  | 1.520   |
| .tpo6 | 3.228    | 0.196   | 16.458  | 0.000   | 3.228  | 1.908   |
| .tsc1 | 5.067    | 0.163   | 31.005  | 0.000   | 5.067  | 3.462   |
| .tsc2 | 4.987    | 0.180   | 27.752  | 0.000   | 4.987  | 3.110   |
| .tsc3 | 4.877    | 0.215   | 22.716  | 0.000   | 4.877  | 2.602   |
| .tsc4 | 4.310    | 0.182   | 23.742  | 0.000   | 4.310  | 2.618   |
| .int1 | 0.000    |         |         |         | 0.000  | 0.000   |
| .ATT  | 0.000    |         |         |         | 0.000  | 0.000   |
| .CCB  | 0.000    |         |         |         | 0.000  | 0.000   |
| .SKV  | 0.000    |         |         |         | 0.000  | 0.000   |
| .SKD  | 0.000    |         |         |         | 0.000  | 0.000   |
| .FCV  | 0.000    |         |         |         | 0.000  | 0.000   |
| .TPO  | 0.000    |         |         |         | 0.000  | 0.000   |
| .TSC  | 0.000    |         |         |         | 0.000  | 0.000   |

Thresholds:

|         | Estimate | Std.Err | z-value | P(> z ) | Std.lv | Std.all |
|---------|----------|---------|---------|---------|--------|---------|
| int1 t1 | -0.896   | 0.135   | -6.626  | 0.000   | -0.896 | -0.873  |
| int1 t2 | -0.619   | 0.134   | -4.608  | 0.000   | -0.619 | -0.603  |
| int1 t3 | -0.447   | 0.134   | -3.331  | 0.001   | -0.447 | -0.435  |
| int1 t4 | -0.262   | 0.134   | -1.952  | 0.051   | -0.262 | -0.255  |
| int1 t5 | -0.141   | 0.134   | -1.051  | 0.293   | -0.141 | -0.137  |
| int1 t6 | 0.078    | 0.134   | 0.585   | 0.558   | 0.078  | 0.076   |

Variances:

|       | Estimate | Std.Err | z-value | P(> z ) | Std.lv | Std.all |
|-------|----------|---------|---------|---------|--------|---------|
| .att1 | 0.405    | 0.034   | 12.008  | 0.000   | 0.405  | 0.105   |
| .att3 | 0.580    | 0.035   | 16.551  | 0.000   | 0.580  | 0.136   |
| .ccb1 | 0.485    | 0.033   | 14.557  | 0.000   | 0.485  | 0.233   |
| .ccb2 | 1.400    | 0.045   | 31.087  | 0.000   | 1.400  | 0.579   |
| .ccb3 | 0.645    | 0.020   | 32.530  | 0.000   | 0.645  | 0.432   |
| .ccb4 | 0.707    | 0.015   | 45.927  | 0.000   | 0.707  | 0.659   |
| .ccb5 | 0.600    | 0.018   | 32.599  | 0.000   | 0.600  | 0.409   |
| .ccb6 | 0.551    | 0.030   | 18.069  | 0.000   | 0.551  | 0.251   |
| .ccb7 | 0.451    | 0.034   | 13.355  | 0.000   | 0.451  | 0.195   |
| .ccb8 | 0.551    | 0.020   | 26.964  | 0.000   | 0.551  | 0.343   |
| .skv1 | 0.722    | 0.034   | 21.414  | 0.000   | 0.722  | 0.288   |

|                     |          |         |         |         |        |         |
|---------------------|----------|---------|---------|---------|--------|---------|
| .skv2               | 0.761    | 0.032   | 24.063  | 0.000   | 0.761  | 0.256   |
| .skv3               | 0.339    | 0.031   | 10.759  | 0.000   | 0.339  | 0.118   |
| .skd1               | 1.107    | 0.055   | 20.068  | 0.000   | 1.107  | 0.468   |
| .skd2               | 1.066    | 0.056   | 19.048  | 0.000   | 1.066  | 0.433   |
| .fcv1               | 1.350    | 0.078   | 17.356  | 0.000   | 1.350  | 0.451   |
| .fcv2               | 0.116    | 0.098   | 1.182   | 0.237   | 0.116  | 0.042   |
| .fcv3               | 1.955    | 0.082   | 23.762  | 0.000   | 1.955  | 0.627   |
| .tpo1               | 0.355    | 0.036   | 9.949   | 0.000   | 0.355  | 0.109   |
| .tpo2               | 0.355    | 0.033   | 10.910  | 0.000   | 0.355  | 0.116   |
| .tpo3               | 0.564    | 0.039   | 14.452  | 0.000   | 0.564  | 0.173   |
| .tpo4               | 0.715    | 0.046   | 15.520  | 0.000   | 0.715  | 0.248   |
| .tpo5               | 0.789    | 0.030   | 26.366  | 0.000   | 0.789  | 0.292   |
| .tpo6               | 0.980    | 0.040   | 24.782  | 0.000   | 0.980  | 0.342   |
| .tsc1               | 0.739    | 0.025   | 29.090  | 0.000   | 0.739  | 0.345   |
| .tsc2               | 0.655    | 0.028   | 23.727  | 0.000   | 0.655  | 0.255   |
| .tsc3               | 0.671    | 0.045   | 15.034  | 0.000   | 0.671  | 0.191   |
| .tsc4               | 1.197    | 0.038   | 31.533  | 0.000   | 1.197  | 0.441   |
| .int1               | 0.552    |         |         |         | 0.552  | 0.524   |
| .ATT                | 1.341    | 0.053   | 25.229  | 0.000   | 0.387  | 0.387   |
| CCB                 | 1.596    | 0.082   | 19.467  | 0.000   | 1.000  | 1.000   |
| SKV                 | 1.784    | 0.087   | 20.561  | 0.000   | 1.000  | 1.000   |
| SKD                 | 1.259    | 0.083   | 15.172  | 0.000   | 1.000  | 1.000   |
| FCV                 | 1.645    | 0.119   | 13.806  | 0.000   | 1.000  | 1.000   |
| TPO                 | 2.893    | 0.158   | 18.329  | 0.000   | 1.000  | 1.000   |
| TSC                 | 1.404    | 0.067   | 21.017  | 0.000   | 1.000  | 1.000   |
| Scales y*:          |          |         |         |         |        |         |
|                     | Estimate | Std.Err | z-value | P(> z ) | Std.lv | Std.all |
| int1                | 1.000    |         |         |         | 1.000  | 1.000   |
| R-Square:           |          |         |         |         |        |         |
|                     | Estimate |         |         |         |        |         |
| att1                | 0.895    |         |         |         |        |         |
| att3                | 0.864    |         |         |         |        |         |
| ccb1                | 0.767    |         |         |         |        |         |
| ccb2                | 0.421    |         |         |         |        |         |
| ccb3                | 0.568    |         |         |         |        |         |
| ccb4                | 0.341    |         |         |         |        |         |
| ccb5                | 0.591    |         |         |         |        |         |
| ccb6                | 0.749    |         |         |         |        |         |
| ccb7                | 0.805    |         |         |         |        |         |
| ccb8                | 0.657    |         |         |         |        |         |
| skv1                | 0.712    |         |         |         |        |         |
| skv2                | 0.744    |         |         |         |        |         |
| skv3                | 0.882    |         |         |         |        |         |
| skd1                | 0.532    |         |         |         |        |         |
| skd2                | 0.567    |         |         |         |        |         |
| fcv1                | 0.549    |         |         |         |        |         |
| fcv2                | 0.958    |         |         |         |        |         |
| fcv3                | 0.373    |         |         |         |        |         |
| tpo1                | 0.891    |         |         |         |        |         |
| tpo2                | 0.884    |         |         |         |        |         |
| tpo3                | 0.827    |         |         |         |        |         |
| tpo4                | 0.752    |         |         |         |        |         |
| tpo5                | 0.708    |         |         |         |        |         |
| tpo6                | 0.658    |         |         |         |        |         |
| tsc1                | 0.655    |         |         |         |        |         |
| tsc2                | 0.745    |         |         |         |        |         |
| tsc3                | 0.809    |         |         |         |        |         |
| tsc4                | 0.559    |         |         |         |        |         |
| int1                | 0.476    |         |         |         |        |         |
| ATT                 | 0.613    |         |         |         |        |         |
| Defined Parameters: |          |         |         |         |        |         |
|                     | Estimate | Std.Err | z-value | P(> z ) | Std.lv | Std.all |
| i_ccb               | -0.070   | 0.008   | -8.773  | 0.000   | -0.088 | -0.086  |
| i_skv               | -0.093   | 0.011   | -8.747  | 0.000   | -0.124 | -0.120  |
| i_skd               | -0.011   | 0.012   | -0.893  | 0.372   | -0.012 | -0.012  |
| i_fcv               | 0.125    | 0.011   | 11.553  | 0.000   | 0.160  | 0.156   |
| i_tpo               | -0.002   | 0.008   | -0.197  | 0.843   | -0.003 | -0.003  |
| i_tsc               | 0.191    | 0.015   | 12.372  | 0.000   | 0.227  | 0.221   |
| i_hea               | 0.003    | 0.015   | 0.216   | 0.829   | 0.003  | 0.003   |
| i_ri2               | 0.028    | 0.032   | 0.894   | 0.371   | 0.028  | 0.013   |
| i_ri3               | 0.124    | 0.044   | 2.795   | 0.005   | 0.124  | 0.044   |
| i_rel               | -0.003   | 0.007   | -0.416  | 0.678   | -0.003 | -0.005  |

|       |        |       |        |       |        |        |
|-------|--------|-------|--------|-------|--------|--------|
| i_pol | -0.055 | 0.007 | -7.803 | 0.000 | -0.055 | -0.104 |
| i_ag2 | 0.133  | 0.037 | 3.636  | 0.000 | 0.133  | 0.063  |
| i_ag3 | 0.242  | 0.048 | 5.011  | 0.000 | 0.242  | 0.093  |
| i_mal | 0.103  | 0.027 | 3.820  | 0.000 | 0.103  | 0.050  |
| i_edu | 0.229  | 0.037 | 6.285  | 0.000 | 0.229  | 0.097  |
| i_inc | 0.106  | 0.033 | 3.258  | 0.001 | 0.106  | 0.046  |
| i_imm | -0.099 | 0.035 | -2.857 | 0.004 | -0.099 | -0.036 |
| i_par | 0.054  | 0.029 | 1.855  | 0.064 | 0.054  | 0.026  |
| i_kid | -0.109 | 0.032 | -3.412 | 0.001 | -0.109 | -0.046 |
| t_ccb | -0.051 | 0.018 | -2.880 | 0.004 | -0.065 | -0.063 |
| t_skv | -0.133 | 0.021 | -6.287 | 0.000 | -0.177 | -0.173 |
| t_skd | -0.007 | 0.025 | -0.294 | 0.769 | -0.008 | -0.008 |
| t_fcv | 0.154  | 0.017 | 9.020  | 0.000 | 0.197  | 0.192  |
| t_tpo | 0.004  | 0.016 | 0.265  | 0.791 | 0.007  | 0.007  |
| t_tsc | 0.199  | 0.028 | 7.160  | 0.000 | 0.236  | 0.230  |
| t_hea | 0.013  | 0.028 | 0.454  | 0.649 | 0.013  | 0.011  |
| t_ri2 | 0.071  | 0.056 | 1.264  | 0.206 | 0.071  | 0.032  |
| t_ri3 | 0.091  | 0.074 | 1.224  | 0.221 | 0.091  | 0.032  |
| t_rel | -0.004 | 0.012 | -0.314 | 0.753 | -0.004 | -0.007 |
| t_pol | -0.057 | 0.011 | -5.065 | 0.000 | -0.057 | -0.108 |
| t_ag2 | 0.180  | 0.068 | 2.648  | 0.008 | 0.180  | 0.086  |
| t_ag3 | 0.373  | 0.084 | 4.469  | 0.000 | 0.373  | 0.143  |
| t_mal | 0.050  | 0.047 | 1.060  | 0.289 | 0.050  | 0.024  |
| t_edu | 0.249  | 0.056 | 4.488  | 0.000 | 0.249  | 0.105  |
| t_inc | 0.158  | 0.056 | 2.825  | 0.005 | 0.158  | 0.068  |
| t_imm | -0.103 | 0.061 | -1.692 | 0.091 | -0.103 | -0.038 |
| t_par | 0.033  | 0.052 | 0.633  | 0.526 | 0.033  | 0.016  |
| t_kid | -0.131 | 0.057 | -2.291 | 0.022 | -0.131 | -0.055 |

## A11. Power analysis “Model 3”.

```
> # Power analysis
> p1 <- semPower(type='post-hoc',effect=.05,effect.measure='RMSEA',alpha=.05,N=3110,df=701)
> summary(p1)

semPower: Post-hoc power analysis

F0                1.752500
RMSEA             0.050000
Mc                0.416341

df                701
Num Observations  3110
NCP               5448.522

Critical Chi-Square  763.7046
Alpha              0.050000
Beta               < 1.00e-320
Power (1-beta)     > 0.9999
Implied Alpha/Beta Ratio > 1.00e-320

> p2 <- semPower(type='compromise',effect=.1,effect.measure='RMSEA',abratio=1,N=3110,df=701)
> summary(p2)

semPower: Compromise power analysis

WARNING: Alpha and/or Beta are smaller than 1e-240. Cannot determine critical Chi-Square
exactly due to machine precision.
F0                7.010000
RMSEA             0.100000
Mc                0.030047

df                701
Num Observations  3110
Desired Alpha/Beta Ratio 1.000000

Critical Chi-Square  3236.794 < Chi-Square < 13964.40
Implied Alpha       < 1.00e-320
Implied Beta        < 1.00e-240
Implied Power (1-beta) > 0.9999
Actual Alpha/Beta Ratio
```

## A12. Additional models predicting COVID-19 conspiracy beliefs, skepticism toward vaccines, fear of COVID-19, and trust in science.

```

> ### Predicting background factors
> m4.1 <- '
+ # COVID-19 conspiracy beliefs
+ CCB=~ccb1+ccb2+ccb3+ccb4+ccb5+ccb6+ccb7+ccb8
+ CCB ~ health+risk2+risk3+rel+pol+age2+age3+male+edu+inc+imm+part+kids'
> f4.1 <- sem(m4.1,data=tpb_data,missing="FIML",estimator="MLR")
Warnmeldung:
In lav_data_full(data = data, group = group, cluster = cluster, :
lavaan WARNING: 422 cases were deleted due to missing values in
exogenous variable(s), while fixed.x = TRUE.
> summary(f4.1,standardized=TRUE)
lavaan 0.6-9 ended normally after 61 iterations

Estimator              ML
Optimization method    NLMINB
Number of model parameters 37

Number of observations    Used      Total
Number of missing patterns 72

Model Test User Model:

Test Statistic          Standard      Robust
Degrees of freedom      1241.839    873.941
P-value (Chi-square)    111         111
Scaling correction factor 0.000       0.000
Yuan-Bentler correction (Mplus variant) 1.421

Parameter Estimates:

Standard errors          Sandwich
Information bread       Observed
Observed information based on Hessian

Latent Variables:

Estimate Std.Err z-value P(>|z|) Std.lv Std.all
CCB =~
ccb1      1.000
ccb2      0.985    0.030   32.440   0.000   1.172   0.748
ccb3      0.907    0.030   30.616   0.000   1.155   0.689
ccb4      0.700    0.034   20.625   0.000   1.063   0.820
ccb5      0.951    0.032   29.887   0.000   0.820   0.761
ccb6      1.166    0.031   37.659   0.000   1.115   0.849
ccb7      1.148    0.032   35.704   0.000   1.367   0.843
ccb8      1.148    0.032   35.704   0.000   1.346   0.811
ccb8      1.012    0.029   34.971   0.000   1.187   0.860

Regressions:

Estimate Std.Err z-value P(>|z|) Std.lv Std.all
CCB ~
health    -0.010    0.029   -0.354   0.724   -0.009  -0.008
risk2     0.120    0.052    2.327   0.020    0.103   0.048
risk3     0.104    0.080    1.312   0.190    0.089   0.032
rel       0.051    0.013    4.067   0.000    0.044   0.082
pol       0.119    0.013    9.218   0.000    0.102   0.197
age2     -0.153    0.064   -2.390   0.017   -0.131  -0.064
age3     -0.327    0.079   -4.130   0.000   -0.279  -0.110
male     -0.047    0.045   -1.058   0.290   -0.040  -0.020
edu      -0.356    0.047   -7.636   0.000   -0.304  -0.129
inc      -0.348    0.048   -7.313   0.000   -0.297  -0.130
imm       0.172    0.058    2.964   0.003    0.147   0.056
part     -0.057    0.046   -1.238   0.216   -0.049  -0.024
kids      0.203    0.054    3.757   0.000    0.174   0.075

Intercepts:

Estimate Std.Err z-value P(>|z|) Std.lv Std.all
.ccb1     1.513    0.137   11.064   0.000    1.513   0.965
.ccb2     1.786    0.136   13.133   0.000    1.786   1.067
.ccb3     1.374    0.124   11.093   0.000    1.374   1.061
.ccb4     1.145    0.095   12.029   0.000    1.145   1.063
.ccb5     1.203    0.129    9.298   0.000    1.203   0.916

```

```

.ccb6      1.525   0.159   9.595   0.000   1.525   0.941
.ccb7      1.502   0.157   9.581   0.000   1.502   0.905
.ccb8      1.271   0.138   9.235   0.000   1.271   0.921
.CCB       0.000           0.000   0.000   0.000   0.000

Variances:
      Estimate Std.Err z-value P(>|z|) Std.lv Std.all
.ccb1      1.085   0.059  18.367   0.000   1.085   0.441
.ccb2      1.472   0.069  21.262   0.000   1.472   0.525
.ccb3      0.549   0.037  14.899   0.000   0.549   0.327
.ccb4      0.487   0.029  16.830   0.000   0.487   0.420
.ccb5      0.480   0.034  14.314   0.000   0.480   0.279
.ccb6      0.760   0.045  16.849   0.000   0.760   0.289
.ccb7      0.943   0.059  15.905   0.000   0.943   0.342
.ccb8      0.496   0.035  14.325   0.000   0.496   0.261
.CCB       1.227   0.070  17.509   0.000   0.893   0.893

>
> m4.2 <- '
+ # Skepticism toward vaccines
+ SKV=~skv1+skv2+skv3
+ SKV ~ health+risk2+risk3+rel+pol+age2+age3+male+edu+inc+imm+part+kids'
> f4.2 <- sem(m4.2,data=tpb_data,missing="FIML",estimator="MLR")
Warnmeldung:
In lav_data_full(data = data, group = group, cluster = cluster, :
lavaan WARNING: 422 cases were deleted due to missing values in
exogenous variable(s), while fixed.x = TRUE.
> summary(f4.2,standardized=TRUE)
lavaan 0.6-9 ended normally after 53 iterations

Estimator              ML
Optimization method    NLMINB
Number of model parameters      22

Number of observations      3110      Total 3532
Number of missing patterns      8

Model Test User Model:

Test Statistic          Standard      Robust
Degrees of freedom      46.484      44.629
P-value (Chi-square)    26          26
Scaling correction factor 0.008      0.013
Yuan-Bentler correction (Mplus variant) 1.042

Parameter Estimates:

Standard errors          Sandwich
Information bread        Observed
Observed information based on Hessian

Latent Variables:

      Estimate Std.Err z-value P(>|z|) Std.lv Std.all
SKV =~
skv1      1.000           1.387   0.825
skv2      1.188   0.021  55.341   0.000   1.648   0.913
skv3      1.205   0.021  56.912   0.000   1.672   0.935

Regressions:

      Estimate Std.Err z-value P(>|z|) Std.lv Std.all
SKV ~
health    -0.055   0.034  -1.643   0.100  -0.040  -0.037
risk2     0.038   0.060   0.629   0.529   0.027   0.013
risk3     0.038   0.087   0.438   0.661   0.028   0.010
rel       0.037   0.014   2.605   0.009   0.027   0.050
pol       0.133   0.014   9.227   0.000   0.096   0.185
age2      0.045   0.072   0.627   0.530   0.032   0.016
age3     -0.028   0.092  -0.301   0.763  -0.020  -0.008
male     -0.043   0.052  -0.837   0.403  -0.031  -0.016
edu      -0.530   0.061  -8.673   0.000  -0.382  -0.162
inc      -0.361   0.061  -5.911   0.000  -0.261  -0.114
imm       0.208   0.067   3.123   0.002   0.150   0.057
part     -0.101   0.057  -1.771   0.077  -0.073  -0.036
kids      0.155   0.063   2.477   0.013   0.112   0.049

```

## Intercepts:

|       | Estimate | Std.Err | z-value | P(> z ) | Std.lv | Std.all |
|-------|----------|---------|---------|---------|--------|---------|
| .skv1 | 2.844    | 0.156   | 18.253  | 0.000   | 2.844  | 1.691   |
| .skv2 | 3.442    | 0.185   | 18.613  | 0.000   | 3.442  | 1.908   |
| .skv3 | 3.098    | 0.187   | 16.546  | 0.000   | 3.098  | 1.732   |
| .SKV  | 0.000    |         |         |         | 0.000  | 0.000   |

## Variances:

|       | Estimate | Std.Err | z-value | P(> z ) | Std.lv | Std.all |
|-------|----------|---------|---------|---------|--------|---------|
| .skv1 | 0.904    | 0.044   | 20.406  | 0.000   | 0.904  | 0.320   |
| .skv2 | 0.539    | 0.035   | 15.589  | 0.000   | 0.539  | 0.166   |
| .skv3 | 0.405    | 0.035   | 11.671  | 0.000   | 0.405  | 0.127   |
| .SKV  | 1.736    | 0.065   | 26.533  | 0.000   | 0.902  | 0.902   |

```
>
> m4.3 <- '
+ # Fear of COVID-19
+ FCV=~fcv1+fcv2+fcv3
+ FCV ~ health+risk2+risk3+rel+pol+age2+age3+male+edu+inc+imm+part+kids'
> f4.3 <- sem(m4.3,data=tpb_data,missing="FIML",estimator="MLR")
```

## Warnmeldung:

```
In lav_data_full(data = data, group = group, cluster = cluster, :
lavaan WARNING: 422 cases were deleted due to missing values in
exogenous variable(s), while fixed.x = TRUE.
```

```
> summary(f4.3,standardized=TRUE)
lavaan 0.6-9 ended normally after 56 iterations
```

|                            |        |       |
|----------------------------|--------|-------|
| Estimator                  | ML     |       |
| Optimization method        | NLMINB |       |
| Number of model parameters | 22     |       |
|                            | Used   | Total |
| Number of observations     | 3110   | 3532  |
| Number of missing patterns | 6      |       |

## Model Test User Model:

|                                         | Standard | Robust |
|-----------------------------------------|----------|--------|
| Test Statistic                          | 73.235   | 71.557 |
| Degrees of freedom                      | 26       | 26     |
| P-value (Chi-square)                    | 0.000    | 0.000  |
| Scaling correction factor               |          | 1.023  |
| Yuan-Bentler correction (Mplus variant) |          |        |

## Parameter Estimates:

|                               |          |
|-------------------------------|----------|
| Standard errors               | Sandwich |
| Information bread             | Observed |
| Observed information based on | Hessian  |

## Latent Variables:

|        | Estimate | Std.Err | z-value | P(> z ) | Std.lv | Std.all |
|--------|----------|---------|---------|---------|--------|---------|
| FCV =~ |          |         |         |         |        |         |
| fcv1   | 1.000    |         |         |         | 1.577  | 0.856   |
| fcv2   | 0.936    | 0.022   | 41.861  | 0.000   | 1.476  | 0.820   |
| fcv3   | 0.859    | 0.022   | 39.693  | 0.000   | 1.354  | 0.725   |

## Regressions:

|        | Estimate | Std.Err | z-value | P(> z ) | Std.lv | Std.all |
|--------|----------|---------|---------|---------|--------|---------|
| FCV ~  |          |         |         |         |        |         |
| health | -0.258   | 0.039   | -6.561  | 0.000   | -0.163 | -0.151  |
| risk2  | 0.482    | 0.070   | 6.864   | 0.000   | 0.306  | 0.141   |
| risk3  | 0.857    | 0.100   | 8.530   | 0.000   | 0.543  | 0.196   |
| rel    | 0.078    | 0.017   | 4.669   | 0.000   | 0.049  | 0.092   |
| pol    | -0.115   | 0.016   | -7.210  | 0.000   | -0.073 | -0.141  |
| age2   | 0.013    | 0.081   | 0.155   | 0.877   | 0.008  | 0.004   |
| age3   | -0.072   | 0.105   | -0.690  | 0.490   | -0.046 | -0.018  |
| male   | -0.144   | 0.060   | -2.386  | 0.017   | -0.091 | -0.046  |
| edu    | 0.324    | 0.071   | 4.584   | 0.000   | 0.205  | 0.087   |
| inc    | 0.073    | 0.072   | 1.005   | 0.315   | 0.046  | 0.020   |
| imm    | -0.013   | 0.078   | -0.164  | 0.870   | -0.008 | -0.003  |
| part   | 0.239    | 0.066   | 3.624   | 0.000   | 0.152  | 0.074   |
| kids   | -0.162   | 0.072   | -2.245  | 0.025   | -0.103 | -0.045  |

## Intercepts:



```

      Estimate Std.Err z-value P(>|z|) Std.lv Std.all
.fcv1      5.355   0.185  28.961   0.000   5.355   2.905
.fcv2      5.966   0.174  34.254   0.000   5.966   3.315
.fcv3      4.282   0.161  26.631   0.000   4.282   2.293
.FCV       0.000           0.000   0.000   0.000   0.000

Variances:
      Estimate Std.Err z-value P(>|z|) Std.lv Std.all
.fcv1      0.911   0.076  11.924   0.000   0.911   0.268
.fcv2      1.061   0.050  21.382   0.000   1.061   0.328
.fcv3      1.654   0.056  29.466   0.000   1.654   0.474
.FCV       2.164   0.089  24.389   0.000   0.870   0.870

>
> m4.4 <- '
+ # Trust in science
+ TSC=~tsc1+tsc2+tsc3+tsc4
+ TSC ~ health+risk2+risk3+rel+pol+age2+age3+male+edu+inc+imm+part+kids'
> f4.4 <- sem(m4.4,data=tpb_data,missing="FIML",estimator="MLR")
Warnmeldung:
In lav_data_full(data = data, group = group, cluster = cluster, :
lavaan WARNING: 422 cases were deleted due to missing values in
exogenous variable(s), while fixed.x = TRUE.
> summary(f4.4,standardized=TRUE)
lavaan 0.6-9 ended normally after 53 iterations

Estimator              ML
Optimization method    NLMINB
Number of model parameters 25

Number of observations    Used      Total
                        3110      3532
Number of missing patterns 9

Model Test User Model:
                        Standard      Robust
Test Statistic          223.115      208.705
Degrees of freedom      41          41
P-value (Chi-square)    0.000      0.000
Scaling correction factor 1.069
Yuan-Bentler correction (Mplus variant)

Parameter Estimates:

Standard errors          Sandwich
Information bread       Observed
Observed information based on Hessian

Latent Variables:
      Estimate Std.Err z-value P(>|z|) Std.lv Std.all
TSC =~
  tsc1      1.000           1.306   0.827
  tsc2      1.210   0.024  51.269   0.000   1.581   0.904
  tsc3      1.298   0.027  47.992   0.000   1.696   0.848
  tsc4      1.042   0.021  49.106   0.000   1.362   0.783

Regressions:
      Estimate Std.Err z-value P(>|z|) Std.lv Std.all
TSC ~
  health      0.101   0.032   3.118   0.002   0.077   0.071
  risk2       0.119   0.056   2.139   0.032   0.091   0.042
  risk3       0.097   0.080   1.217   0.224   0.075   0.027
  rel         0.007   0.014   0.487   0.626   0.005   0.009
  pol        -0.132   0.013  -9.871   0.000  -0.101  -0.196
  age2        0.002   0.066   0.036   0.971   0.002   0.001
  age3        0.275   0.086   3.180   0.001   0.210   0.083
  male        0.258   0.049   5.294   0.000   0.198   0.099
  edu         0.514   0.055   9.281   0.000   0.394   0.167
  inc         0.269   0.055   4.845   0.000   0.206   0.090
  imm        -0.011   0.060  -0.174   0.862  -0.008  -0.003
  part        0.026   0.054   0.475   0.635   0.020   0.010
  kids       -0.199   0.059  -3.375   0.001  -0.152  -0.066

Intercepts:
      Estimate Std.Err z-value P(>|z|) Std.lv Std.all

```

|            |          |         |         |         |        |         |
|------------|----------|---------|---------|---------|--------|---------|
| .tsc1      | 5.089    | 0.151   | 33.727  | 0.000   | 5.089  | 3.224   |
| .tsc2      | 4.851    | 0.182   | 26.594  | 0.000   | 4.851  | 2.775   |
| .tsc3      | 4.443    | 0.195   | 22.813  | 0.000   | 4.443  | 2.221   |
| .tsc4      | 4.433    | 0.158   | 28.118  | 0.000   | 4.433  | 2.549   |
| .TSC       | 0.000    |         |         |         | 0.000  | 0.000   |
| Variances: |          |         |         |         |        |         |
|            | Estimate | Std.Err | z-value | P(> z ) | Std.lv | Std.all |
| .tsc1      | 0.786    | 0.037   | 20.959  | 0.000   | 0.786  | 0.315   |
| .tsc2      | 0.557    | 0.035   | 15.751  | 0.000   | 0.557  | 0.182   |
| .tsc3      | 1.127    | 0.057   | 19.876  | 0.000   | 1.127  | 0.282   |
| .tsc4      | 1.170    | 0.050   | 23.232  | 0.000   | 1.170  | 0.387   |
| .TSC       | 1.520    | 0.066   | 23.120  | 0.000   | 0.891  | 0.891   |
